# Supplementary material for: Pd-catalyzed S -glycosylation of cysteine-containing peptides at room temperature
Source: Royal Society of Chemistry journal article supplement (doi:10.1039/d4qo01389a), 2024-01-01

## Supporting information

### Pd-Catalyzed S-glycosylation of cysteine-containing peptides at room temperature

Linhua Chen,<sup>a</sup> Franck Le Bideau,<sup>a</sup> Gong Chen<sup>b</sup> and Samir Messaoudi<sup>\*[a,c]</sup>

*[a] Université Paris-Saclay, BioCIS, CNRS, 17, Avenue des Sciences, 91400 Orsay, France*

*[b] State Key Laboratory and Institute of Elemento-Organic Chemistry, College of Chemistry, Nankai University, Tianjin 300071, China*

*[c] Laboratoire de Synthèse Organique, Ecole Polytechnique, CNRS, ENSTA, Institut Polytechnique de Paris, Palaiseau, France*

\*To whom the correspondence should be addressed. E-mail [samir.messaoudi@cnrs.fr](mailto:samir.messaoudi@cnrs.fr)

#### Table of Contents

|                                                                                |    |
|--------------------------------------------------------------------------------|----|
| 1. General information .....                                                   | 2  |
| 2. General Procedures .....                                                    | 2  |
| 3. Characterization Data for products <b>3</b> , <b>5</b> and <b>7</b> : ..... | 3  |
| 7. References .....                                                            | 17 |
| 8. NMR Spectra .....                                                           | 18 |

## 1. General information

Solvents and reagents are obtained from commercial suppliers and were used without further purification. Analytical TLC was performed using Merck silica gel F254 (230-400 mesh) plates and analyzed by UV light or by staining upon heating with vanilin solution (15 g of vanilin in 250 mL ethanol and 2.5 mL of concentrated sulfuric acid). For silica gel chromatography, the flash chromatography technique was used, with Merck silica gel 60 (230-400 mesh) and p.a. grade solvents unless otherwise noted. The  $^1\text{H}$  NMR and  $^{13}\text{C}$  NMR spectra were recorded in either acetone or MeOD- $d_4$  on Bruker Avance 300 spectrometers. The chemical shifts of  $^1\text{H}$  and  $^{13}\text{C}$  are reported in ppm relative to the solvent residual peaks. IR spectra were measured on a Bruker Vector 22 spectrophotometer. Merck silica gel 60 (0.015–0.040 mm) was used for column chromatography. Melting points were recorded on a Büchi B-450 apparatus and are uncorrected. High resolution mass spectra (HR-MS) were recorded on a MicroMass LCT Premier Spectrometer spectrometer, mass analyzer type: Time of Flight Mass Spectrometer (TOF). Optical rotations were obtained with a PolAAr 32 polarimeter. Merck silica gel 60 (0.015–0.040 mm) was used for column chromatography. Melting points were recorded on a Büchi B-450 apparatus and are uncorrected. High resolution mass spectra (HR-MS) were recorded on a MicroMass LCT Premier Spectrometer spectrometer, mass analyzer type: Time of Flight Mass Spectrometer (TOF). Optical rotations were obtained with a PolAAr 32 polarimeter.

## 2. General Procedure for the coupling of iodoglycals with Cysteine containing peptides

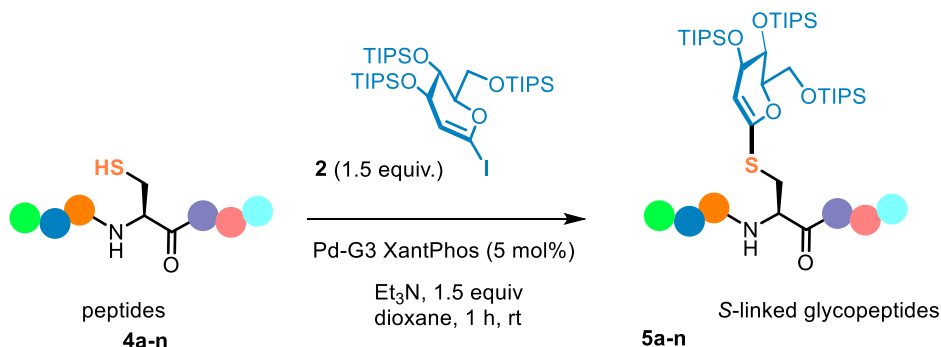

All 1-iodine sugars were synthesized according to previously reported protocols.<sup>1,2</sup>  
All cysteine-containing peptides were synthesized according to literature procedures.<sup>3,4,5</sup>

## 3. General Procedure for the coupling of iodoglycals with other thiols

A vial (5 mL) with a stir bar was charged with iodoglycal (0.12 mmol), cysteine-containing peptide (0.1 mmol), Xantphos Pd-G<sub>3</sub> (0.005 mmol). The vial was then evacuated and backfilled with an argon balloon. Dry 1,4-dioxane (1 mL) was added and the mixture stirred at room temperature for 1 min. Et<sub>3</sub>N (0.15 mmol) was added and the reaction mixture stirred intensely under Ar at room temperature for one hour. The reaction mixture was extracted with DCM, and the organic layer was washed with brine, dried over Na<sub>2</sub>SO<sub>4</sub> and concentrated. The residue was purified by flash chromatography.

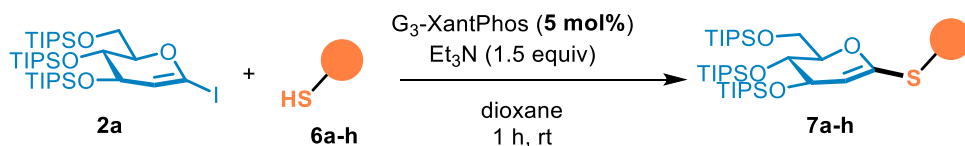

A vial (5 mL) with a stir bar was charged with iodoglycal (0.12 mmol), thiol (0.1 mmol), Xantphos Pd-G<sub>3</sub> (0.005 mmol). The vial was then evacuated and backfilled with an argon balloon. Dry 1,4-dioxane (1 mL) was added and the mixture stirred at room temperature for 1 min. Et<sub>3</sub>N (0.15 mmol) was added and the reaction mixture stirred intensely under Ar at room temperature for one hour. The reaction mixture was extracted with DCM, and the organic layer was washed with brine, dried over Na<sub>2</sub>SO<sub>4</sub> and concentrated. The residue was purified by flash chromatography.

### 3. Experimental data

*Methyl-S-((2S,3S,4S)-3,4-bis((triisopropylsilyl)oxy)-2-(((triisopropylsilyl)oxy)methyl)-3,4-dihydro-2H-pyran-6-yl)-N-(tert-butoxycarbonyl)-L-cysteinate*

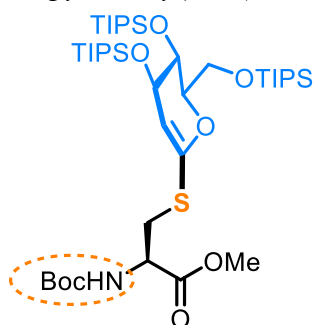

Following the general procedure, starting from cysteine (23.5 mg, 0.1 mmol) and iodoglycal (89 mg, 0.12 mmol), the residue was purified by flash chromatography (PE) to provide compound **3a** (75.3 mg, 89 %) as a colorless liquid.  $R_f = 0.5$  (cyclohexane);  $[\alpha]_D^{22} = -14.8$  (c, 0.5, DCM); <sup>1</sup>H NMR (300 MHz, acetone-*d*<sub>6</sub>):  $\delta$  6.20 (bd,  $J = 9.0$  Hz, 1 H), 5.20 (dd,  $J = 5.1, 1.5$  Hz, 1H), 4.48–4.32 (m, 2 H), 4.24–4.10 (m, 3 H), 4.02 (dd,  $J = 11.1, 4.5$  Hz, 1H), 3.70 (s, 3 H), 3.27 (dd,  $J = 13.8, 5.4$  Hz, 1H), 3.10 (dd,  $J = 13.8, 8.4$  Hz, 1H), 1.42 (s, 9 H), 1.24–0.99 (m, 63H); <sup>13</sup>C NMR (75 MHz, acetone-*d*<sub>6</sub>) 172.5, 156.3, 149.45, 103.4, 84.5, 79.8, 71.1, 68.5, 62.7, 54.9, 52.7, 33.7, 28.9, 18.8, 13.6, 13.5, 13.14; IR (neat): 2943, 2891, 2362, 1749, 1653, 1463, 1213, 1064, 1059, 1030, 881, 752, 657 cm<sup>-1</sup>; HRMS (ESI):  $m/z$  calc. for C<sub>42</sub>H<sub>85</sub>NNaO<sub>8</sub>SSi<sub>3</sub> [M+Na]<sup>+</sup> 870.5196; found 870.5199.

*Methyl-N-(((9H-fluoren-9-yl)methoxy)carbonyl)-S-((2S,3S,4S)-3,4-bis((triisopropylsilyl)oxy)-2-(((triisopropylsilyl)oxy)methyl)-3,4-dihydro-2H-pyran-6-yl)-L-cysteinate*

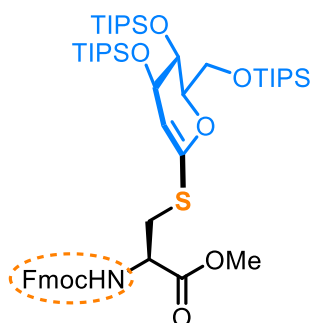

Following the general procedure, starting from cysteine **2b** (35.8 mg, 0.1 mmol) and iodoglycal (89 mg, 0.12 mmol), the residue was purified by flash chromatography (PE) to provide compound **3b** (83.4 mg, 84 %) as a colorless liquid.  $R_f = 0.5$  (cyclohexane);  $[\alpha]_D^{22} = -15.6$  (c, 0.4, DCM); <sup>1</sup>H NMR (300 MHz, acetone-*d*<sub>6</sub>)  $\delta$  7.87 (d,  $J = 7.2$  Hz, 2H), 7.79–7.65 (m, 2H), 7.43 (t,  $J = 7.4$  Hz, 2H), 7.34 (t,  $J = 7.4$  Hz, 2H), 6.89 (bd,  $J = 7.9$  Hz, 1H), 5.23 (d,  $J = 5.0$  Hz, 1H), 4.57–4.42 (m, 2H), 4.39–4.25 (m, 3H), 4.25–4.00 (m, 4H), 3.73 (s, 3H), 3.38 (dd,  $J = 13.7, 5.0$  Hz, 1H), 3.14 (dd,  $J = 13.6, 8.8$  Hz, 1H), 1.24–0.98

(m, 63H);  $^{13}\text{C}$  NMR (75 MHz, acetone- $d_6$ )  $\delta$  172.1, 156.7, 148.8, 145.4, 142.4, 142.1, 128.8, 128.2, 126.4, 126.4, 121.1, 102.4, 84.5, 70.9, 68.3, 67.7, 62.7, 55.4, 52.8, 48.3, 33.2, 18.9, 18.8, 18.8, 13.5, 12.4, 13.1; IR (neat): 2943, 2891, 2866, 2372, 2324, 1749, 1653, 1508, 1458, 1246, 1085, 881, 790, 756, 681  $\text{cm}^{-1}$ ; HRMS (ESI):  $m/z$  calc. for  $\text{C}_{52}\text{H}_{87}\text{NNaO}_8\text{SSi}_3$   $[\text{M}+\text{Na}]^+$  992.5352; found 992.5359.

*Methyl-N-acetyl-S-((2S,3S,4S)-3,4-bis((triisopropylsilyl)oxy)-2-(((triisopropylsilyl)oxy)methyl)-3,4-dihydro-2H-pyran-6-yl)-L-cysteinate*

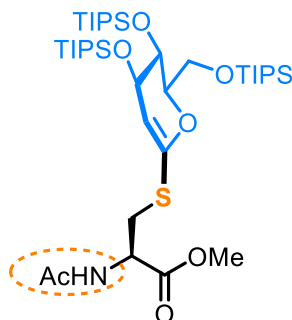

Following the general procedure, starting from cysteine **2c** (18 mg, 0.1 mmol) and iodosugar (89 mg, 0.12 mmol), the residue was purified by flash chromatography (PE) to provide compound **3c** (64.7 mg, 82 %) as a colorless liquid.  $R_f$  = 0.5 (cyclohexane);  $[\alpha]_D^{22} = -13.1$  (c, 0.5, DCM);  $^1\text{H}$  NMR (300 MHz, acetone- $d_6$ )  $\delta$  7.35 (bd,  $J = 7.8$  Hz, 1 H), 5.17 (dd,  $J = 5.1, 1.2$  Hz, 1H), 4.68-4.61 (m, 1H), 4.44-4.42 (m, 1H), 4.22-4.11 (m, 3 H), 4.01 (dd,  $J = 11.4, 4.5$  Hz, 1H), 3.68 (s, 3 H), 3.25 (dd,  $J = 13.5, 5.1$  Hz, 1H), 3.11 (dd,  $J = 13.5, 7.8$  Hz, 1H), 1.93 (s, 3H), 1.13-1.10 (m, 63 H);  $^{13}\text{C}$  NMR (75 MHz, acetone- $d_6$ )  $\delta$  172.1, 169.7, 149.0, 103.1, 84.5, 71.0, 68.3, 62.6, 53.5, 52.6, 33.5, 22.9, 18.7, 13.4, 13.1; IR (neat): 2943, 2891, 2866, 2360, 1749, 1653, 1463, 1085, 1059, 1030, 881, 790, 752, 680  $\text{cm}^{-1}$ ; HRMS (ESI):  $m/z$  calc. for  $\text{C}_{39}\text{H}_{79}\text{NNaO}_7\text{SSi}_3$   $[\text{M}+\text{Na}]^+$  812.4777; found 812.4795.

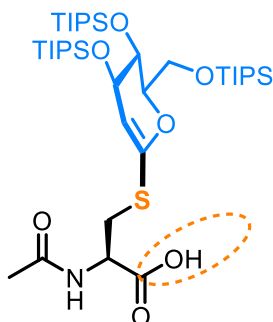

Following the general procedure, starting from cysteine **2d** (16.2 mg, 0.1 mmol) and iodosugar (89 mg, 0.12 mmol), the residue was purified by flash chromatography (DCM/MeOH = 99/1) to provide compound **3d** (54.4 mg, 62 %) as a colorless liquid.  $R_f$  = 0.2 (DCM/MeOH=99/1);  $[\alpha]_D^{22} = -18.9$  (c, 0.6, DCM);  $^1\text{H}$  NMR (300 MHz, Methanol- $d_4$ )  $\delta$  5.00 (dd,  $J = 5.1, 1.5$  Hz, 1H), 4.37 (dd,  $J = 7.4, 4.3$  Hz, 1H), 4.24 (m, 1H), 4.12 – 3.91 (m, 3H), 3.84 (dd,  $J = 11.3, 4.6$  Hz, 1H), 3.35 – 3.23 (m, 1H), 1.89 (s, 3H), 1.07 – 0.79 (m, 63H).  $^{13}\text{C}$  NMR (75 MHz, Methanol- $d_4$ )  $\delta$  150.5, 84.6, 71.4, 68.8, 63.0, 55.0, 47.8, 35.2, 22.9, 18.6, 13.8, 13.1, 9.23; IR (neat): 2949, 2891, 2866, 2360, 1765, 1653, 1467, 1097, 1067, 881, 790, 752, 680, 485  $\text{cm}^{-1}$ ; HRMS (ESI):  $m/z$  calc. for  $\text{C}_{38}\text{H}_{77}\text{NNaO}_7\text{SSi}_3$   $[\text{M}+\text{H}]^+$  776.4801; found 776.4797.

*Methyl-N-(tert-butoxycarbonyl)-S-((2S,3S,4S)-2-methyl-3,4-bis((triisopropylsilyl)oxy)-3,4-dihydro-2H-pyran-6-yl)-L-cysteinate.*

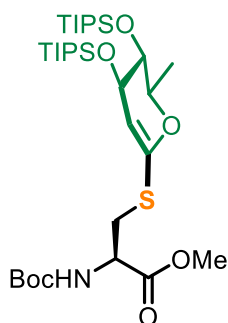

Following the general procedure, starting from cysteine **2a** (23.5 mg, 0.1 mmol) and iodosugar (68.5 mg, 0.12 mmol), the residue was purified by flash chromatography (PE) to provide compound **3f** (58.7 mg, 85 %) as a colorless liquid.  $R_f = 0.5$  (cyclohexane);  $[\alpha]_D^{22} = -30.7$  (c, 0.4, DCM);  $^1\text{H NMR}$  (300 MHz, acetone-*d*<sub>6</sub>)  $\delta$  6.16 (bd,  $J = 7.3$  Hz, 1H), 5.29–5.03 (m, 1H), 4.61–4.29 (m, 2H), 4.21–4.10 (m, 1H), 4.05 (d,  $J = 1.5$  Hz, 1H), 3.72 (s, 3H), 3.36 (dd,  $J = 14.0, 4.3$  Hz, 1H), 2.91 (dd,  $J = 13.9, 8.9$  Hz, 1H), 1.49 (d,  $J = 7.1$  Hz, 3H), 1.43 (s, 9H), 1.19–1.03 (m, 42H);  $^{13}\text{C NMR}$  (75 MHz, acetone-*d*<sub>6</sub>)  $\delta$  171.3, 155.2, 146.8, 102.8, 78.6, 77.4, 73.3, 68.0, 66.7, 53.9, 51.5, 32.5, 27.4, 17.7, 15.1, 12.4, 12.3; IR (neat): 2943, 2891, 2866, 2359, 2324, 1749, 1717, 1624, 1463, 1338, 1167, 1085, 10498, 881, 756, 680  $\text{cm}^{-1}$ ; HRMS (ESI):  $m/z$  calc. for  $\text{C}_{33}\text{H}_{65}\text{NNaO}_7\text{SSi}_2$   $[\text{M}+\text{Na}]^+$  698.3912; found 698.3910.

*Methyl-S-((2R,3R,4S)-2,4-bis((triisopropylsilyl)oxy)-3-(((triisopropylsilyl)oxy)methyl)-3,4-dihydro-2H-pyran-6-yl)-N-(tert-butoxycarbonyl)-L-cysteinate.*

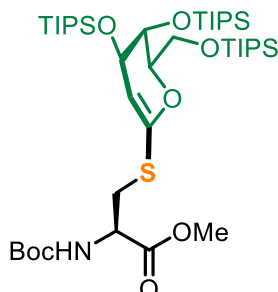

Following the general procedure, starting from cysteine **2a** (23.5 mg, 0.1 mmol) and iodosugar (89 mg, 0.12 mmol), the residue was purified by flash chromatography (PE) to provide compound **3g** (75.8 mg, 87 %) as a colorless liquid.  $R_f = 0.5$  (cyclohexane);  $[\alpha]_D^{22} = -48.3$  (c, 0.5, DCM);  $^1\text{H NMR}$  (300 MHz, acetone-*d*<sub>6</sub>)  $\delta$  6.22 (bd,  $J = 9.0$  Hz, 1H), 5.20 (dd,  $J = 5.1, 1.5$  Hz, 1H), 4.53–4.47 (m, 2H), 4.25–4.09 (m, 3H), 4.02 (dd,  $J = 11.4, 4.5$  Hz, 1H), 3.70 (s, 3H), 3.27 (dd,  $J = 13.5, 5.1$  Hz, 1H), 3.00 (dd,  $J = 13.5, 8.4$  Hz, 1H), 1.42 (s, 9H), 1.22–1.10 (m, 63H);  $^{13}\text{C NMR}$  (75 MHz, acetone-*d*<sub>6</sub>)  $\delta$  171.8, 161.9, 149.0, 103.3, 84.5, 79.8, 71.1, 68.4, 62.7, 54.9, 52.7, 33.7, 28.9, 18.8, 13.6, 13.5, 13.1; IR (neat): 2943, 2891, 2362, 1749, 1653, 1463, 1213, 1064, 1059, 1030, 881, 752, 657  $\text{cm}^{-1}$ ; HRMS (ESI):  $m/z$  calc. for  $\text{C}_{42}\text{H}_{85}\text{NNaO}_8\text{SSi}_3$   $[\text{M}+\text{Na}]^+$  870.5196; found 870.5198.

*Methyl-S-((3S,4S)-3,4-bis((triisopropylsilyl)oxy)-3,4-dihydro-2H-pyran-6-yl)-N-(tert-butoxycarbonyl)-L-cysteinate.*

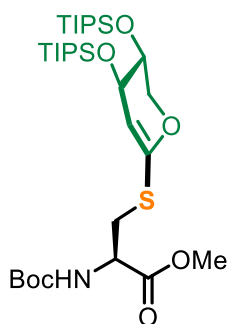

Following the general procedure, starting from cysteine **2a** (23.5 mg, 0.1 mmol) and iodosugar (66.5 mg, 0.12 mmol), the residue was purified by flash chromatography (PE) to provide compound **3h** (53.5 mg, 81 %) as a colorless liquid.  $R_f = 0.5$  (cyclohexane); colorless liquid;  $[\alpha]_D^{22} = -60.8$  (c, 0.53, DCM);  $^1\text{H NMR}$  (300 MHz, acetone- $d_6$ )  $\delta$  6.20 (bd,  $J = 6.9$  Hz, 1H), 5.21 (dd,  $J = 5.2, 1.3$  Hz, 1H), 4.42 (d,  $J = 6.8$  Hz, 1H), 4.22 (dt,  $J = 13.2, 2.1$  Hz, 1H), 4.14 (bd,  $J = 10.7$  Hz, 1H), 4.08–4.04 (m, 1H), 4.01–3.95 (m, 1H), 3.72 (s, 3H), 3.17 (d,  $J = 6.3$  Hz, 2H), 1.43 (s, 9H), 1.27–0.96 (m, 42H).  $^{13}\text{C NMR}$  (75 MHz, acetone- $d_6$ )  $\delta$  171.6, 156.0, 150.8, 104.3, 79.5, 70.1, 68.9, 67.0, 54.5, 52.0, 33.6, 28.6, 18.5, 13.3, 13.2; IR (neat): 2943, 2891, 2866, 2362, 1749, 1718, 1622, 1506, 1436, 1365, 1114, 1097, 1049, 914, 881, 752, 680  $\text{cm}^{-1}$ ; HRMS (ESI):  $m/z$  calc. for  $\text{C}_{32}\text{H}_{63}\text{NNaO}_7\text{SSi}_2$   $[\text{M}+\text{Na}]^+$  684.3756; found 684.3757.

*methyl N-(((9H-fluoren-9-yl)methoxy)carbonyl)-S-((2R,3R)-3,4-bis((triisopropylsilyl)oxy)-2-(((triisopropylsilyl)oxy)methyl)-3,4-dihydro-2H-pyran-6-yl)-L-cysteinyl-L-isoleucinate.*

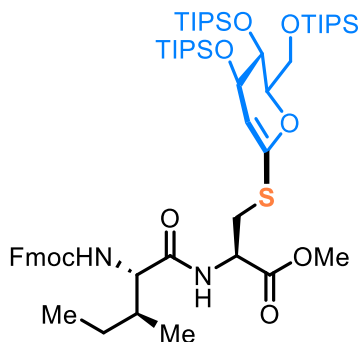

Following the general procedure, starting from cysteine containing peptide (46.9 mg, 0.1 mmol) and iodosugar (89 mg, 0.12 mmol), the residue was purified by flash chromatography (PE) to provide compound **5a** (90.1 mg, 84 % yield) as a colorless liquid.  $R_f = 0.4$  ((EtOAc /cyclohexane = 1:9);  $[\alpha]_D^{22} = -67$  (c, 0.7, DCM)  $^1\text{H NMR}$  (300 MHz, Acetone- $d_6$ )  $\delta$  7.86 (d,  $J = 7.5$  Hz, 2H), 7.77 – 7.67 (m, 2H), 7.62 (d,  $J = 7.5$  Hz, 1H), 7.48 – 7.32 (m, 4H), 6.40 (d,  $J = 8.8$  Hz, 1H), 5.19 (d,  $J = 5.2$  Hz, 1H), 4.75 – 4.52 (m, 1H), 4.46 – 4.02 (m, 10H), 3.70 (s, 3H), 3.35 (dd,  $J = 13.6, 5.3$  Hz, 1H), 3.15 (dd,  $J = 13.6, 8.2$  Hz, 1H), 1.93 (m, 1H), 1.23 – 0.87 (m, 69H);  $^{13}\text{C NMR}$  (75 MHz, acetone- $d_6$ )  $\delta$  133.8, 130.9, 128.5, 127.9, 126.1, 120.8, 84.3, 70.7, 68.0, 67.4, 62.4, 55.1, 48.1, 33.1, 25.3, 18.4, 13.3, 12.8; IR (neat): 2978, 2889, 2389, 2330, 1749, 1547, 1508, 1467, 1246, 1085, 897, 756, 787, 687  $\text{cm}^{-1}$ ; HRMS (ESI):  $m/z$  calc. for  $\text{C}_{58}\text{H}_{98}\text{N}_2\text{NaO}_9\text{SSi}_3$   $[\text{M}+\text{Na}]^+$  1105.6193; found 1105.6190.

*Methyl-N-(N2-(((9H-fluoren-9-yl)methoxy)carbonyl)-N5-trityl-L-glutaminy)-S-((2S,3S,4S)-3,4-bis((triisopropylsilyl)oxy)-2-(((triisopropylsilyl)oxy)methyl)-3,4-dihydro-2H-pyran-6-yl)-L-cysteinate.*

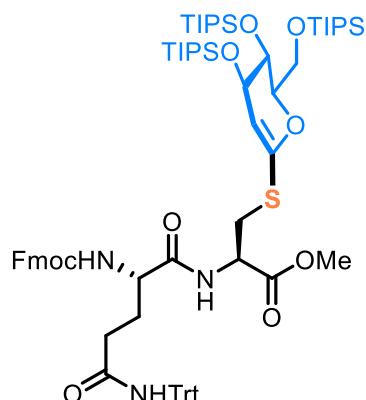

Following the general procedure, starting from cysteine containing peptide (72.7 mg, 0.1 mmol) and iodosugar (89 mg, 0.12 mmol), the residue was purified by flash chromatography (PE) to provide compound **5b** (70.5 mg, 53 %) as a colorless liquid.  $R_f = 0.4$  (EtOAc/cyclohexane = 1:9);  $[\alpha]_D^{22} = -25.3$  (c, 0.5, DCM);  $^1\text{H NMR}$  (300 MHz, acetone- $d_6$ )  $\delta$  7.92–7.81 (m, 3H), 7.85–7.5 (m, 3H), 7.48 (bt,  $J = 7.5$  Hz, 2H), 7.43–7.24 (m, 15H), 6.67 (bd,  $J = 12.3$  Hz, 1H), 5.25 (bd,  $J = 5.1$  Hz, 1H), 4.71 (bq,  $J = 5.2$  Hz, 1H), 4.54–4.46 (m, 1H), 4.46–3.96 (m, 8H), 3.74 (s, 3H), 3.42 (dd,  $J = 13.6, 5.1$  Hz, 1H), 3.10 (dd,  $J = 13.6, 8.4$  Hz, 1H), 2.69–2.55 (m, 2H), 2.25–2.10 (m, 2H), 1.26–0.95 (m, 63H);  $^{13}\text{C NMR}$  (75 MHz, acetone- $d_6$ )  $\delta$  172.9, 172.8, 172.0, 157.4, 149.1, 146.7, 145.6, 142.6, 130.3, 129.1, 128.9, 127.9, 125.7, 121.4, 103.8, 84.8, 71.5, 71.2, 68.5, 67.9, 63.0, 55.6, 53.8, 53.1, 48.6, 34.0, 33.6, 19.0, 13.8, 13.7, 13.3; HRMS (ESI):  $m/z$  calc. for  $\text{C}_{76}\text{H}_{109}\text{N}_3\text{NaO}_{10}\text{Si}_3$   $[\text{M}+\text{Na}]^+$  1362.7034; found 1362.7049.

*Methyl-N-(((9H-fluoren-9-yl)methoxy)carbonyl)glycyl)-S-((2S,3S,4S)-3,4-bis((triisopropylsilyl)oxy)-2-(((triisopropylsilyl)oxy)methyl)-3,4-dihydro-2H-pyran-6-yl)-L-cysteinate.*

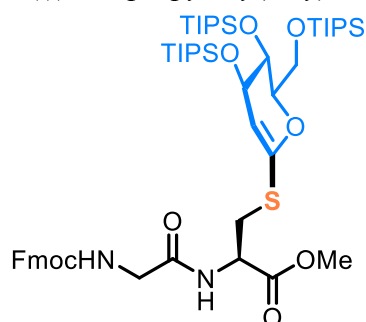

Following the general procedure, starting from cysteine containing peptide (41.5 mg, 0.1 mmol) and iodosugar (89 mg, 0.12 mmol), the residue was purified by flash chromatography (EtOAc/cyclohexane = 10:90) to provide compound **5c** (74.7 mg, 73%) as a colorless liquid  $R_f = 0.3$  (EtOAc/cyclohexane = 2:8);  $[\alpha]_D^{22} = -14.9$  (c, 0.5, DCM);  $^1\text{H NMR}$  (300 MHz, acetone- $d_6$ )  $\delta$  7.95 (d,  $J = 7.0$  Hz, 2H), 7.81 (dd,  $J = 6.9, 4.1$  Hz, 1H), 7.48 (t,  $J = 7.0$  Hz, 1H), 7.42 (t,  $J = 7.0$  Hz, 1H), 6.96 (bd,  $J = 7.6$  Hz, 1H), 5.31 (d,  $J = 5.1$  Hz, 1H), 4.66–4.48 (m, 2H), 4.47–4.33 (m, 3H), 4.32–4.18 (m, 3H), 4.17–4.06 (m, 1H), 3.81 (s, 3H), 3.57–3.35 (m, 1H), 3.22 (dd,  $J = 13.8, 8.8$  Hz, 1H), 1.29–1.05 (m, 63H);  $^{13}\text{C NMR}$  (75 MHz, acetone- $d_6$ )  $\delta$  172.2, 148.9, 145.3, 142.5, 128.9, 128.3, 126.5, 121.1, 103.9, 84.6, 71.1, 68.4, 67.8, 62.8, 55.3, 52.9, 48.4, 33.7, 18.8, 13.6, 13.5, 13.2; IR (neat): 2943, 2891,

2866, 2372, 2324, 1683, 1508, 1458, 1246, 1085, 881, 756, 740, 680  $\text{cm}^{-1}$ ; HRMS (ESI):  $m/z$  calc. for  $\text{C}_{54}\text{H}_{90}\text{N}_2\text{NaO}_9\text{SSi}_3$   $[\text{M}+\text{Na}]^+$  1049.5567; found 1049.5570.

*Methyl-N-(((9H-fluoren-9-yl)methoxy)carbonyl)-L-methionyl)-S-((2S,3S,4S)-3,4-bis((triisopropylsilyl)oxy)-2-(((triisopropylsilyl)oxy)methyl)-3,4-dihydro-2H-pyran-6-yl)-L-cysteinate.*

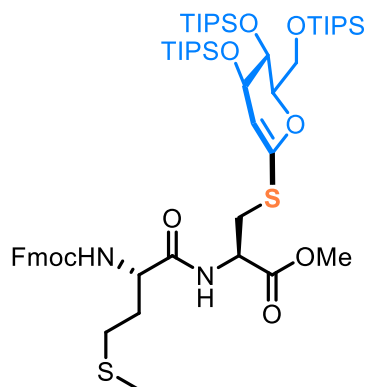

Following the general procedure, starting from cysteine containing peptide (48.8 mg, 0.1 mmol) and iodosugar (89 mg, 0.12 mmol), the residue was purified by flash chromatography (PE) to provide compound **5d** (83.4 mg, 76 % yield) as a colorless liquid.  $R_f = 0.4$  (EtOAc /cyclohexane = 1:9);  $[\alpha]_D^{22} = -32.7$  (c, 0.4, DCM);  $^1\text{H}$  NMR (300 MHz, acetone- $d_6$ )  $\delta$  7.87 (d,  $J = 7.3$  Hz, 1H), 7.79–7.62 (m, 3H), 7.47–7.26 (m, 4H), 6.63 (bd,  $J = 7.6$  Hz, 1H), 5.19 (dd,  $J = 5.2, 1.3$  Hz, 1H), 4.80–4.57 (m, 1H), 4.47–4.24 (m, 5H), 4.22–4.07 (m, 3H), 4.03 (dd,  $J = 11.2, 4.7$  Hz, 1H), 3.71 (s, 3H), 3.36 (dd,  $J = 13.6, 5.2$  Hz, 1H), 3.14 (dd,  $J = 13.6, 8.3$  Hz, 1H), 2.60 (t,  $J = 7.7$  Hz, 2H), 2.15–2.04 (m, 6H), 1.25–0.99 (m, 63H);  $^{13}\text{C}$  NMR (75 MHz, acetone- $d_6$ )  $\delta$  172.2, 171.7, 148.8, 142.4, 128.8, 128.2, 126.4, 121.0, 103.7, 84.5, 70.9, 68.3, 67.5, 62.7, 55.1, 53.4, 52.8, 48.3, 33.5, 33.4, 18.7, 15.5, 13.5, 13.4, 13.0; IR (neat): 2943, 2891, 2866, 2374, 2330, 1749, 1683, 1541, 1508, 1458, 1246, 1085, 883, 756, 740, 681  $\text{cm}^{-1}$ ; HRMS (ESI):  $m/z$  calc. for  $\text{C}_{57}\text{H}_{96}\text{N}_2\text{NaO}_9\text{S}_2\text{Si}_3$   $[\text{M}+\text{Na}]^+$  1123.5757; found 1123.5760.

*(9H-fluoren-9-yl)methyl-(S)-2-(((R)-3-(((2S,3S,4S)-3,4-bis((triisopropylsilyl)oxy)-2-(((triisopropylsilyl)oxy)methyl)-3,4-dihydro-2H-pyran-6-yl)thio)-1-methoxy-1-oxopropan-2-yl)glycyl)pyrrolidine-1-carboxylate*

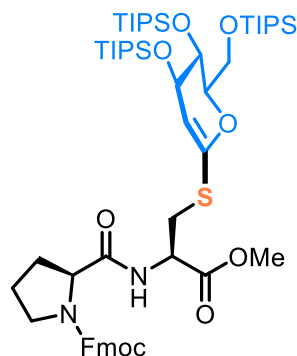

Following the general procedure, starting from cysteine containing peptide (46.8 mg, 0.1 mmol) and iodosugar (89 mg, 0.12 mmol), the residue was purified by flash chromatography (PE) to provide compound **5e** (73.1 mg, 68 %) as a colorless liquid.  $R_f = 0.3$  (EtOAc/cyclohexane = 2:8);  $[\alpha]_D^{22} = -23.1$  (c, 0.5, DCM);  $^1\text{H}$  NMR (300 MHz, acetone- $d_6$ )  $\delta$  7.91 (bd,  $J = 7.3$  Hz, 2H), 7.78–7.63 (m, 2H), 7.53–7.23 (m, 3H), 5.19 (bs, 1H), 4.90–4.65 (m, 1H), 4.58–4.30 (m, 4H), 4.26–4.02 (m, 4H), 3.80–



3.69 (m, 1H), 3.69–3.58 (m, 3H), 3.58–3.46 (m, 1H), 3.43–3.31 (m, 1H), 3.16 (dd,  $J = 13.4, 8.6$  Hz, 1H), 2.44–2.18 (m, 2H), 2.04–1.85 (m, 2H), 1.44–0.92 (m, 63H);  $^{13}\text{C}$  NMR (75 MHz, acetone- $d_6$ )  $\delta$  171.9, 149.0, 142.5, 128.9, 128.3, 126.5, 121.1, 103.9, 84.5, 71.0, 68.7, 68.4, 62.8, 61.7, 53.3, 52.8, 53.1, 48.5, 34.9, 33.8, 26.9, 26.0, 18.8, 13.6, 13.5, 13.1; IR (neat): 2943, 2891, 2866, 2359, 1734, 1508, 1463, 1365, 1247, 1170, 1083, 1064, 1014, 883, 792, 683, 657  $\text{cm}^{-1}$ ; HRMS (ESI):  $m/z$  calc. for  $\text{C}_{57}\text{H}_{94}\text{N}_2\text{NaO}_9\text{SSi}_3$   $[\text{M}+\text{Na}]^+$  1089.5880.

*Methyl-N-(N2-(((9H-fluoren-9-yl)methoxy)carbonyl)-N6-(tert-butoxycarbonyl)-L-lysyl)-S-((2S,3S,4S)-3,4-bis((triisopropylsilyl)oxy)-2-(((triisopropylsilyl)oxy)methyl)-3,4-dihydro-2H-pyran-6-yl)-L-cysteinate*

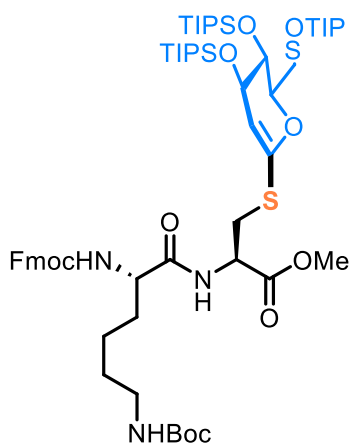

Following the general procedure, starting from cysteine containing peptide (58.7 mg, 0.1 mmol) and iodosugar (89 mg, 0.12 mmol), the residue was purified by flash chromatography (EtOAc/cyclohexane = 10:90) to provide compound **5f** (81.9 mg, 66%) as a colorless liquid.  $R_f = 0.3$  (EtOAc/cyclohexane = 2:8);  $[\alpha]_D^{22} = -3.2$  (c, 0.4, DCM);  $^1\text{H}$  NMR (300 MHz, acetone- $d_6$ )  $\delta$  7.94–7.81 (m, 2H), 7.78–7.63 (m, 3H), 7.39 (dt,  $J = 24.1, 7.4$  Hz, 4H), 6.53 (bd,  $J = 7.5$  Hz, 1H), 5.89 (bs, 1H), 5.18 (d,  $J = 5.0$  Hz, 1H), 4.67 (bd,  $J = 5.6$  Hz, 1H), 4.48–3.97 (m, 9H), 3.71 (s, 1H), 3.35 (dd,  $J = 13.5, 5.1$  Hz, 1H), 3.17–3.00 (m, 3H), 2.84 (bs, 1H), 1.93–1.78 (m, 2H), 1.81–1.62 (m, 1H), 1.64–1.47 (m, 4H), 1.41 (s, 9H), 1.18–1.01 (m, 63H);  $^{13}\text{C}$  NMR (75 MHz, acetone- $d_6$ )  $\delta$  171.6, 170.6, 147.7, 141.2, 127.6, 127.0, 125.2, 119.9, 102.4, 83.4, 69.8, 67.2, 66.4, 61.6, 54.7, 52.3, 51.6, 47.2, 40.0, 33.7, 32.3, 29.7, 27.8, 24.8, 22.5, 17.7, 12.4, 12.3, 11.9; IR (neat): 3315, 2943, 2866, 2362, 1717, 1522, 1463, 1365, 1247, 1170, 1066, 1014, 883, 790, 682  $\text{cm}^{-1}$ ; HRMS (ESI):  $m/z$  calc. for  $\text{C}_{63}\text{H}_{107}\text{N}_3\text{NaO}_{11}\text{SSi}_3$   $[\text{M}+\text{Na}]^+$  1220.6826; found 1220.6839.

*Methyl-N-(((9H-fluoren-9-yl)methoxy)carbonyl)-L-phenylalanyl)-S-((2S,3S,4S)-3,4-bis((triisopropylsilyl)oxy)-2-(((triisopropylsilyl)oxy)methyl)-3,4-dihydro-2H-pyran-6-yl)-L-cysteinate.*

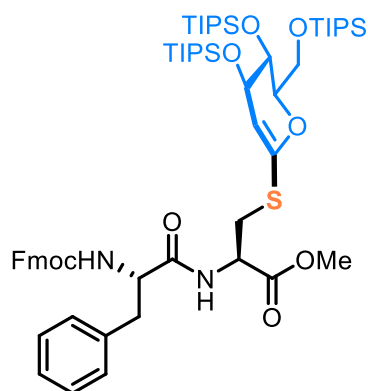

Following the general procedure, starting from cysteine containing peptide (50.6 mg, 0.1 mmol) and iodosugar (89 mg, 0.12 mmol), the residue was purified by flash chromatography (EtOAc/cyclohexane = 5:95 ) to provide compound **5g** (91.5 mg, 82%) as a colorless liquid.  $R_f = 0.4$  (EtOAc /cyclohexane = 1:9),  $[\alpha]_D^{22} = -22.7$  (c, 0.4, DCM);  $^1\text{H NMR}$  (300 MHz, acetone- $d_6$ )  $\delta$  7.86 (d,  $J = 7.2$  Hz, 2H), 7.75–7.58 (m, 3H), 7.42 (t,  $J = 7.5$  Hz, 2H), 7.37–7.18 (m, 7H), 6.53 (bd,  $J = 8.2$  Hz, 1H), 5.22–5.14 (m, 1H), 4.78–4.62 (m, 1H), 4.59–4.48 (m, 1H), 4.47–4.38 (m, 1H), 4.37–4.27 (m, 1H), 4.27–3.99 (m, 6H), 3.71 (s, 3H), 3.41–3.07 (m, 3H), 3.06–2.82 (m, 1H), 1.26–0.92 (m, 63H);  $^{13}\text{C NMR}$  (75 MHz, acetone- $d_6$ )  $\delta$  172.1, 171.7, 172.0, 148.9, 145.3, 142.4, 138.8, 134.9, 130.6, 129.4, 128.8, 128.2, 127.6, 125.4, 121.0, 103.6, 84.5, 71.0, 68.4, 67.6, 62.7, 57.2, 53.5, 52.8, 48.3, 39.2, 33.5, 18.9, 13.6, 13.5, 13.0; IR (neat): 3315, 2943, 2891, 2866, 2372, 2322, 1683, 1541, 1458, 1209, 1087, 883, 788, 756, 681  $\text{cm}^{-1}$ ; HRMS (ESI):  $m/z$  calc. for  $\text{C}_{61}\text{H}_{96}\text{N}_2\text{NaO}_9\text{SSi}_3$   $[\text{M}+\text{Na}]^+$  1139.6037; found 1139.6036.

*Methyl-N-(((benzyloxy)carbonyl)-D-tryptophyl)-S-((2S,3S,4S)-3,4-bis((triisopropylsilyl)oxy)-2-(((triisopropylsilyl)oxy)methyl)-3,4-dihydro-2H-pyran-6-yl)-L-cysteinate*

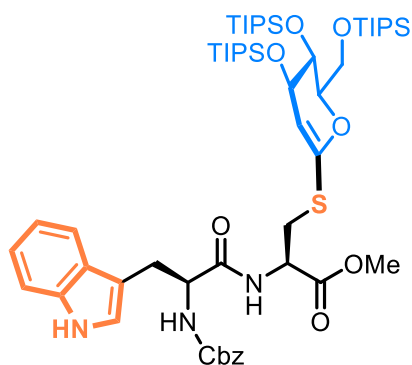

Following the general procedure, starting from cysteine containing peptide (45.5 mg, 0.1 mmol) and iodosugar (89 mg, 0.12 mmol), the residue was purified by flash chromatography (EtOAc/cyclohexane = 5:95 ) to provide compound **5h** (78.8 mg) as a colorless liquid.  $R_f = 0.4$  (EtOAc/cyclohexane = 1:9);  $[\alpha]_D^{22} = -20.4$  (c, 0.6, DCM);  $^1\text{H NMR}$  (300 MHz, acetone- $d_6$ )  $\delta$  10.01 (bs, 1H), 7.62 (bs, 2H), 7.45–7.15 (m, 7H), 7.16–6.85 (m, 2H), 6.26 (bs, 1H), 5.24–5.16 (m, 1H), 5.04 (s, 2H), 4.76–4.35 (m, 3H), 4.28–3.97 (m, 4H), 3.69 (s, 3H), 3.55–2.93 (m, 4H), 1.24–0.90 (m, 63H);  $^{13}\text{C NMR}$  (75 MHz, acetone- $d_6$ )  $\delta$  172.4, 171.7, 148.9, 137.8, 129.4, 129.0, 128.7, 124.8, 122.3, 119.8, 119.5, 112.3, 111.3, 103.5, 84.4, 70.9, 68.3, 67.0, 62.6, 55.7, 53.4, 52.7, 33.4, 18.7, 13.5, 13.4, 13.0; IR (neat): 3363, 2943, 2891, 2866, 2376, 2322, 1743, 1670, 1506, 1458, 1232, 1232, 1087, 883, 740, 681  $\text{cm}^{-1}$ ; HRMS (ESI):  $m/z$  calc. for  $\text{C}_{56}\text{H}_{93}\text{N}_3\text{NaO}_9\text{SSi}_3$   $[\text{M}+\text{Na}]^+$  1090.5833; found 1090.5839.

*Methyl-N-(((9H-fluoren-9-yl)methoxy)carbonyl)-D-histidyl)-S-((2S,3S,4S)-3,4-bis((triisopropylsilyl)oxy)-2-(((triisopropylsilyl)oxy)methyl)-3,4-dihydro-2H-pyran-6-yl)-L-cysteinate*

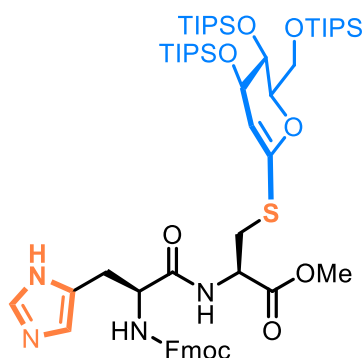

Following the general procedure, starting from cysteine containing peptide (49.5 mg, 0.1 mmol) and iodosugar (89 mg, 0.12 mmol), the residue was purified by flash chromatography (EtOAc/cyclohexane = 5:95) to provide compound **5i** (78.9 mg, 71%) as a colorless liquid.  $R_f = 0.4$  (EtOAc/cyclohexane = 1:9);  $[\alpha]_D^{22} = -26.8$  (c, 0.5, DCM);  $^1\text{H NMR}$  (300 MHz, MeOD)  $\delta$  7.85 (bd,  $J = 7.3$  Hz, 2H), 7.77–7.56 (m, 3H), 7.58–7.24 (m, 4H), 6.96 (s, 1H), 5.19 (bs, 1H), 4.71–4.59 (m, 1H), 4.58–4.49 (m, 1H), 4.49–4.41 (m, 1H), 4.40–4.33 (m, 2H), 4.28 (d,  $J = 6.4$  Hz, 1H), 4.22–4.08 (m, 3H), 4.09–3.90 (m, 1H), 3.78 (s, 3H), 3.51–3.33 (m, 3H), 3.30–3.05 (m, 3H), 3.05–2.92 (m, 1H), 1.20–0.85 (m, 63H); (75 MHz, MeOD)  $\delta$  173.8, 172.2, 158.1, 148.8, 145.3, 142.5, 138.8, 128.2, 126.3, 120.9, 104.0, 84.7, 71.1, 68.4, 68.2, 63.0, 56.3, 53.9, 52.9, 48.4, 33.2, 30.8), 18.6, 13.7, 13.6, 13.3; IR (neat): 3308, 2868, 2891, 2480, 2071, 1674, 1458, 1120, 1026, 975, 883, 790, 681  $\text{cm}^{-1}$ ; HRMS (ESI):  $m/z$  calc. for  $\text{C}_{58}\text{H}_{94}\text{N}_4\text{NaO}_9\text{SSi}_3$   $[\text{M}+\text{Na}]^+$  1129.5942; found 1129.5941.

*Methyl N-(((benzyloxy)carbonyl)-L-seryl)-S-((2S,3S,4S)-3,4-bis((triisopropylsilyl)oxy)-2-(((triisopropylsilyl)oxy)methyl)-3,4-dihydro-2H-pyran-6-yl)-L-cysteinate*

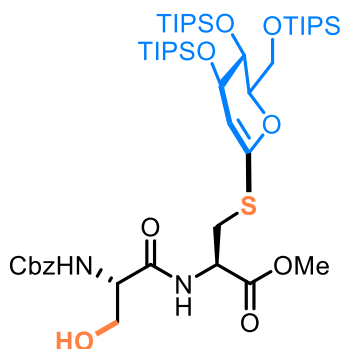

Following the general procedure, starting from cysteine containing peptide (35.7 mg, 0.1 mmol) and iodosugar (89 mg, 0.12 mmol), the residue was purified by flash chromatography (EtOAc/cyclohexane = 5:95) to provide compound **5j** (69.7 mg, 72%) as a colorless liquid.  $R_f = 0.3$  (EtOAc/cyclohexane = 1:9);  $[\alpha]_D^{22} = -57$  (c, 0.7, DCM);  $^1\text{H NMR}$  (300 MHz,  $\text{CDCl}_3$ )  $\delta$  7.72 (bd,  $J = 7.6$  Hz, 1H), 7.53–7.19 (m, 5H), 6.29 (bs, 1H), 5.20 (dd,  $J = 5.2, 1.4$  Hz, 1H), 5.10 (s, 2H), 4.78–4.58 (m, 1H), 4.51–4.35 (m, 1H), 4.34–4.25 (m, 1H), 4.24–4.19 (m, 1H), 4.18–4.10 (m, 2H), 4.10–4.00 (m, 2H), 3.88–3.75 (m, 2H), 3.70 (s, 3H), 3.32 (dd,  $J = 13.6, 5.5$  Hz, 1H), 3.14 (dd,  $J = 13.6, 7.8$  Hz, 1H), 1.16–1.00 (m, 63H);  $^{13}\text{C NMR}$  (75 MHz,  $\text{CDCl}_3$ )  $\delta$  171.8, 171.3, 148.9, 138.3, 129.4, 128.9, 126.8, 103.6, 84.5, 71.0, 68.3, 67.2, 63.7, 62.7, 57.7, 53.5, 52.9, 33.4, 18.7, 13.5, 13.4, 13.0; IR (neat): 3367, 2943, 2891, 2866, 2376, 2322, 1743, 1670, 1506, 1465, 1232, 1087, 740, 681  $\text{cm}^{-1}$ ; HRMS (ESI):  $m/z$  calc. for  $\text{C}_{48}\text{H}_{88}\text{N}_2\text{NaO}_{10}\text{SSi}_3$

[M+Na]<sup>+</sup> 991.5360; found 991.5367.

*Methyl-(R,E)-11-((S)-2-(((benzyloxy)carbonyl)amino)-3-(4-hydroxyphenyl)propanamido)-3,3-diisopropyl-2-methyl-8-(2-(((triisopropylsilyl)oxy)ethylidene)-6-(((triisopropylsilyl)oxy)methyl)-4,7-dioxo-9-thia-3-siladodecan-12-olate*

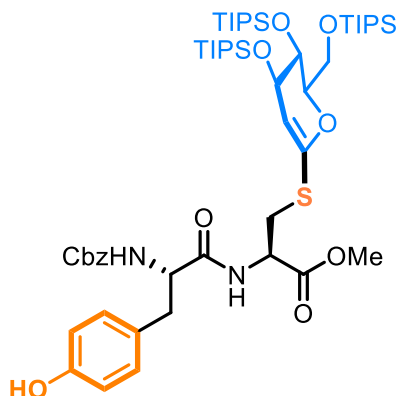

Following the general procedure, starting from cysteine containing peptide (43.3 mg, 0.1 mmol) and iodosugar (89 mg, 0.12 mmol), the residue was purified by flash chromatography (EtOAc/cyclohexane = 5:95) to provide compound **5k** (82.3 mg, 74%) as a colorless liquid. *R*<sub>f</sub> = 0.4 (EtOAc/cyclohexane = 1:9); [α]<sub>D</sub><sup>22</sup> = -16.9 (c, 0.4, DCM); <sup>1</sup>H NMR (300 MHz, acetone-*d*<sub>6</sub>) δ: 8.09 (s, 1H), 7.63 (d, *J* = 7.7 Hz, 1H), 7.43–7.18 (m, 5H), 7.10 (d, *J* = 8.5 Hz, 2H), 6.86–6.49 (m, 2H), 6.25 (bs, 1H), 5.21 (dd, *J* = 5.2, 1.4 Hz, 1H), 5.13–4.88 (m, 2H), 4.77–4.58 (m, 1H), 4.52–4.32 (m, 2H), 4.32–3.97 (m, 4H), 3.71 (s, 3H), 3.30 (dd, *J* = 13.6, 5.7 Hz, 1H), 3.19–3.02 (m, 2H), 2.97–2.85 (m, 4H), 1.25–0.87 (m, 63H); <sup>13</sup>C NMR (75 MHz, acetone-*d*<sub>6</sub>) δ 172.5, 171.9, 157.5, 149.2, 131.8, 129.7, 129.5, 129.0, 128.9, 116.5, 103.9, 84.7, 71.3, 68.6, 67.2, 63.0, 57.7, 53.7, 53.1, 38.7, 33.8, 19.0, 13.8, 13.7, 13.3; IR (neat): 3503, 2945, 2891, 2868, 2376, 2322, 1705, 1683, 1508, 1419, 1361, 1220, 1091, 883, 681 cm<sup>-1</sup>; HRMS (ESI): *m/z* calc. for C<sub>61</sub>H<sub>96</sub>N<sub>2</sub>O<sub>9</sub>SSi<sub>3</sub> [M+Na]<sup>+</sup> 1067.5673; found 1067.5676.

*Methyl-N-((R)-4-acetoxy-4-((tert-butoxycarbonyl)amino)butanoyl)-S-((2S,3S,4S)-3,4-bis(((triisopropylsilyl)oxy)-2-(((triisopropylsilyl)oxy)methyl)-3,4-dihydro-2H-pyran-6-yl)-L-cysteinylglycinate*

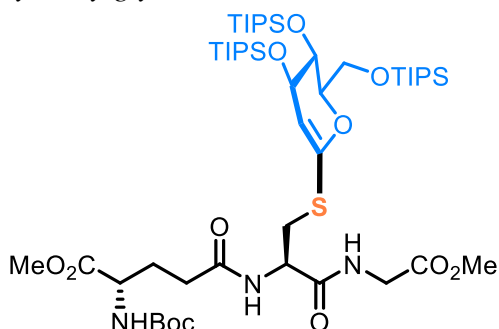

Following the general procedure, starting from cysteine containing peptide (43.6 mg, 0.1 mmol) and iodosugar (89 mg, 0.12 mmol), the residue was purified by flash chromatography (EtOAc/cyclohexane = 10:90) to provide compound **5l** (64.7 mg, 71%) as a colorless liquid. *R*<sub>f</sub> = 0.3 (EtOAc/cyclohexane = 2:8); [α]<sub>D</sub><sup>22</sup> = -6.3 (c, 0.6, DCM); <sup>1</sup>H NMR (300 MHz, acetone-*d*<sub>6</sub>) δ 7.55 (bs, 1H), 7.48 (d, *J* = 7.8 Hz, 1H), 6.34 (bd, *J* = 7.8 Hz, 1H), 5.19 (dd, *J* = 5.1, 1.4 Hz, 1H), 4.63 (d, *J* = 6.0 Hz, 1H), 4.50–4.31 (m, 1H), 4.27–4.17 (m, 2H), 4.17–4.07 (m, 2H), 4.07–3.91 (m, 3H), 3.70 (s, 3H), 3.68 (s, 3H), 3.30

(dd,  $J = 13.5, 5.7$  Hz, 1H), 3.20–3.01 (m, 1H), 2.41 (t,  $J = 7.4$  Hz, 2H), 2.21–2.01 (m, 2H), 1.42 (s, 9H), 1.22–0.93 (m, 63H);  $^{13}\text{C}$  NMR (75 MHz, acetone- $d_6$ )  $\delta$  173.7, 172.8, 171.3, 170.8, 149.4, 102.8, 84.3, 79.5, 70.9, 68.3, 62.4, 54.3, 53.7, 52.4, 52.3, 41.7, 33.2, 32.7, 28.7, , 28.3, 18.6, 13.4, 13.3, 12.9; IR (neat): 3304, 2943, 2891, 2866, 2480, 1745, 1642, 1502, 1436, 1367, 1254, 1209, 1160, 1052, 1026, 975, 883, 802, 772, 730, 680  $\text{cm}^{-1}$ ; HRMS (ESI):  $m/z$  calc. for  $\text{C}_{50}\text{H}_{97}\text{N}_3\text{NaO}_{12}\text{SSi}_3$   $[\text{M}+\text{Na}]^+$  1070.5993; found 1070.5990.

*Methyl-S-((2S,3S,4S)-3,4-bis((triisopropylsilyl)oxy)-2-(((triisopropylsilyl)oxy)methyl)-3,4-dihydro-2H-pyran-6-yl)-N-(tert-butoxycarbonyl)-L-tryptophyl-D-phenylalanyl-D-cysteinate*

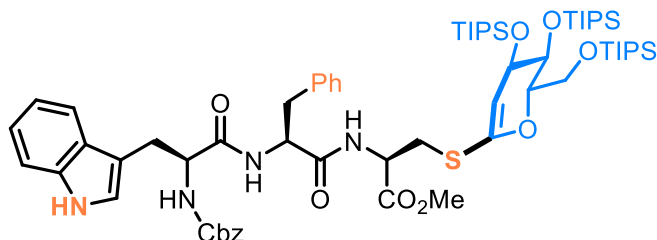

Following the general procedure, starting from cysteine containing peptide (57.1 mg, 0.1 mmol) and iodosugar (89 mg, 0.12 mmol), the residue was purified by flash chromatography (EtOAc /cyclohexane = 10:90) to provide compound **5m** (67.1 mg, 54%) as a colorless liquid.  $R_f = 0.3$  (EtOAc /cyclohexane: 3/7);  $[\alpha]_D^{22} = -11.6$  (c, 0.3, DCM);  $^1\text{H}$  NMR (300 MHz, acetone- $d_6$ )  $\delta$  10.00 (bs, 1H), 7.62 (t,  $J = 7.4$  Hz, 2H), 7.43–7.35 (m, 1H), 7.28–6.98 (m, 8H), 5.87 (bs, 1H), 5.22 (dd,  $J = 5.2, 1.4$  Hz, 1H), 4.83–4.51 (m, 2H), 4.48–4.29 (m, 2H), 4.25–3.94 (m, 4H), 3.70 (s, 3H), 3.39–3.19 (m, 3H), 3.10 (dd,  $J = 13.6, 7.9$  Hz, 2H), 3.00 (d,  $J = 6.5$  Hz, 2H), 1.34 (s, 9H), 1.27–0.92 (m, 63H);  $^{13}\text{C}$  NMR (75 MHz, acetone- $d_6$ )  $\delta$  172.5, 171.7, 171.5, 148.9, 138.2, 137.9, 130.6, 129.3, 127.5, 124.8, 122.4, 119.8, 119.7, 112.4, 111.6, 103.5, 84.4, 79.8, 70.9, 68.3, 62.7, 54.9, 53.6, 52.8, 38.6, 33.3, 28.8, , 18.4, 13.5, 13.4, 13.0; IR (neat): 3311, 2943, 2891, 2866, 2372, 2324, 1749, 1647, 1508, 1458, 1247, 1089, 883, 742, 682  $\text{cm}^{-1}$ ; HRMS (ESI):  $m/z$  calc. for  $\text{C}_{62}\text{H}_{104}\text{N}_4\text{NaO}_{10}\text{SSi}_3$   $[\text{M}+\text{Na}]^+$  1203.6673; found 1203.6676.

*Methyl-S-((2S,3S,4S)-3,4-bis((triisopropylsilyl)oxy)-2-(((triisopropylsilyl)oxy)methyl)-3,4-dihydro-2H-pyran-6-yl)-N-(tert-butoxycarbonyl)-D-phenylalanylprolyl-L-cysteinate*

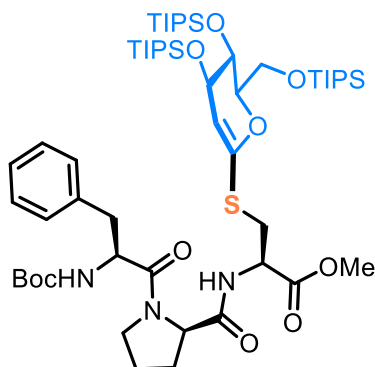

Following the general procedure, starting from cysteine containing peptide (47.5 mg, 0.1 mmol) and iodosugar (89 mg, 0.12 mmol), the residue was purified by flash chromatography (EtOAc /cyclohexane = 10:90) to provide compound **5n** (80.7 mg, 74%) as a colorless liquid.  $[\alpha]_D^{22} = -13.3$  (c, 0.2, DCM);  $^1\text{H}$  NMR (300 MHz, acetone- $d_6$ )  $\delta$  7.68 (bd,  $J = 6.9$  Hz, 1H), 7.51–7.13 (m, 5H), 5.96 (bd,  $J = 8.6$  Hz, 1H), 5.48–5.08 (m, 1H), 4.79–4.33 (m, 4H), 4.34–3.97 (m, 4H), 3.78 (s, 3H), 3.52 (d,

$J = 8.9$  Hz, 2H), 3.34–2.92 (m, 4H), 2.27–2.09 (m, 4H), 1.42 (d,  $J = 6.0$  Hz, 9H), 1.26–1.07 (m, 63H);  $^{13}\text{C}$  NMR (75 MHz, acetone- $d_6$ )  $\delta$  171.4, 170.9, 170.5, 129.6, 129.5, 128.5, 128.1, 126.4, 102.5, 83.2, 83.0, 69.7, 67.2, 61.4, 59.7, 53.6, 52.3, 51.6, 47.0, 38.0, 32.4, 27.6, 24.7, 17.6, 12.4, 12.3, 11.9; IR (neat): 3311, 2943, 2891, 2866, 2372, 1758, 1683, 1541, 1458, 1209, 1087, 883, 788, 756, 680  $\text{cm}^{-1}$ ; HRMS (ESI):  $m/z$  calc. for  $\text{C}_{56}\text{H}_{101}\text{N}_3\text{NaO}_{10}\text{SSi}_3$   $[\text{M}+\text{Na}]^+$  1114.6408; found 1114.6409.

*(2S,3S,4R,5S,6R)-2-(acetoxymethyl)-6-(((2R,3R)-3,4-bis((triisopropylsilyl)oxy)-2-(((triisopropylsilyl)oxy)methyl)-3,4-dihydro-2H-pyran-6-yl)thio)tetrahydro-2H-pyran-3,4,5-triyl triacetate*

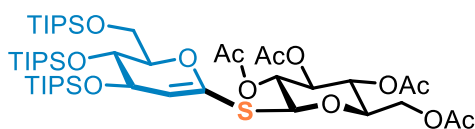

Following the general procedure, starting from thiosugar (36.3 mg, 0.1 mmol) and iodosugar (89 mg, 0.12 mmol), the residue was purified by flash chromatography (EtOAc/cyclohexane = 10:90) to provide compound **7a** (113.5 mg, 93% yield) as a colorless liquid.  $R_f = 0.2$  ((EtOAc/cyclohexane = 1/9);  $[\alpha]_D^{22} = -10.8$  (c, 0.5, DCM);  $^1\text{H}$  NMR (300 MHz, acetone- $d_6$ )  $\delta$  5.42–5.17 (m, 2H), 5.18–4.81 (m, 3H), 4.55–4.38 (m, 1H), 4.34–3.97 (m, 6H), 3.97–3.80 (m, 1H), 2.03 (s, 3H), 2.01 (s, 3H), 2.00 (s, 3H), 1.96 (s, 3H), 1.22–1.04 (m, 63H);  $^{13}\text{C}$  NMR (75 MHz, acetone- $d_6$ )  $\delta$  169.6, 169.2, 168.9, 168.9, 168.6, 147.0, 103.6, 83.6, 83.0, 75.7, 73.6, 70.0, 68.2, 67.2, 61.9, 61.5, 19.8, 19.7, 19.6, 19.6, 17.6, 12.4, 12.3, 11.9; IR (neat): 2943, 2894, 2865, 2364, 2327, 1759, 1627, 1463, 1340, 1229, 1109, 1085, 881, 830, 670  $\text{cm}^{-1}$ ; HRMS (ESI):  $m/z$  calc. for  $\text{C}_{67}\text{H}_{96}\text{NO}_{13}\text{SSi}_3$   $[\text{M}+\text{Na}]^+$  999.5146; found 999.5151.

*(2R,3R,4S,5R,6S)-2-((benzyloxy)methyl)-6-(((2R,3R)-3,4-bis((triisopropylsilyl)oxy)-2-(((triisopropylsilyl)oxy)methyl)-3,4-dihydro-2H-pyran-6-yl)thio)tetrahydro-2H-pyran-3,4,5-triyl tribenzoate*

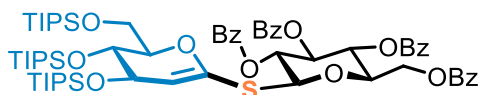

Following the general procedure, starting from thiosugar (61.3 mg, 0.1 mmol) and iodosugar (89 mg, 0.12 mmol), the residue was purified by flash chromatography (EtOAc/cyclohexane = 10:90) to provide compound **7b** (64.7 mg, 71%) as a colorless liquid.  $R_f = 0.3$  ((EtOAc/cyclohexane = 1:9);  $[\alpha]_D^{22} = -32.4$  (c, 0.6, DCM);  $^1\text{H}$  NMR (300 MHz, acetone- $d_6$ )  $\delta$  8.08–8.02 (m, 2H), 8.00–7.89 (m, 4H), 7.87–7.77 (m, 2H), 7.67–7.53 (m, 3H), 7.53–7.32 (m, 9H), 6.05 (t,  $J = 9.3$  Hz, 1H), 5.84 (t,  $J = 9.7$  Hz, 1H), 5.73–5.42 (m, 2H), 5.29 (dd,  $J = 5.1, 1.4$  Hz, 1H), 4.68–4.55 (m, 2H), 4.52–4.37 (m, 2H), 4.25–4.10 (m, 3H), 4.04 (dd,  $J = 11.2, 4.2$  Hz, 1H), 1.36–0.81 (m, 63H);  $^{13}\text{C}$  NMR (75 MHz, acetone- $d_6$ )  $\delta$  165.4, 165.3, 164.8, 164.7, 146.7, 133.4, 133.3, 133.1, 129.9, 129.5, 129.4, 129.2, 129.1, 128.5, 128.4, 104.1, 83.7, 83.3, 75.8, 74.5, 70.6, 70.0, 69.7, 67.3, 63.2, 61.5, 17.6, 12.4, 12.3, 11.9; IR (neat): 2943, 2893, 2866, 2370, 2322, 1743, 1458, 1109, 1066, 830, 680  $\text{cm}^{-1}$ ; HRMS (ESI):  $m/z$  calc. for  $\text{C}_{67}\text{H}_{96}\text{NaO}_{13}\text{SSi}_3$   $[\text{M}+\text{Na}]^+$  1247.5772; found 1247.5771.

*Tribenzyl-((2R,3S,4S,5R,6S)-2-(((benzyloxy)carbonyl)oxy)methyl)-6-(((2R,3R)-3,4-bis((triisopropylsilyl)oxy)-2-(((triisopropylsilyl)oxy)methyl)-3,4-dihydro-2H-pyran-6-yl)thio)tetrahydro-2H-pyran-3,4,5-triyl tricarbonate*

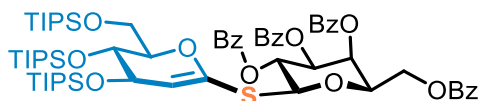

Following the general procedure, starting from thiosugar (61 mg, 0.1 mmol) and iodosugar (89 mg, 0.12 mmol), the residue was purified by flash chromatography (EtOAc/cyclohexane = 10:90 ) to provide compound **7c** (103.1 mg, 84%) as a colorless liquid.  $R_f = 0.3$  (EtOAc/cyclohexane = 2:8);  $[\alpha]_D^{22} = 12.3$  (c, 0.4, DCM);  $^1\text{H NMR}$  (300 MHz, acetone- $d_6$ )  $\delta$  8.10–7.99 (m, 2H), 8.01–7.88 (m, 4H), 7.84 (dd,  $J = 5.2, 3.3$  Hz, 2H), 7.67–7.53 (m, 3H), 7.517.30 (m, 9H), 6.19–5.95 (m, 1H), 5.83 (dd,  $J = 23.4, 13.8$  Hz, 1H), 5.70–5.48 (m, 2H), 5.30 (dd,  $J = 5.1, 1.3$  Hz, 1H), 4.74–4.55 (m, 2H), 4.52–4.39 (m, 2H), 4.25–4.12 (m, 3H), 4.08–3.97 (m, 1H), 1.27–0.93 (m, 63H);  $^{13}\text{C NMR}$  (75 MHz, acetone- $d_6$ )  $\delta$  165.4, 165.3, 164.8, 164.7, 146.7, 133.4, 133.3, 133.1, 129.9, 129.5, 129.4, 129.2, 129.1, 128.5, 128.4, 104.2, 83.5, 83.3, 75.9, 74.5, 70.6, 70.0, 69.7, 67.3, 66.7, 63.2, 61.6, 17.7, 12.5, 12.3, 12.0; IR (neat): 2943, 2893, 2866, 2363, 2322, 1743, 2362, 1749, 1653, 1463, 1066, 881, 757 680, 658  $\text{cm}^{-1}$ ; HRMS (ESI):  $m/z$  calc. for  $\text{C}_{67}\text{H}_{96}\text{O}_{13}\text{SSi}_3$   $[\text{M}+\text{Na}]^+$  1247.5772; found 1247.5771.

*(2S,3R,4S,5S,6R)-2-(((2R,3R)-3,4-bis((triisopropylsilyl)oxy)-2-(((triisopropylsilyl)oxy)methyl)-3,4-dihydro-2H-pyran-6-yl)thio)-6-methyltetrahydro-2H-pyran-3,4,5-triyl triacetate*

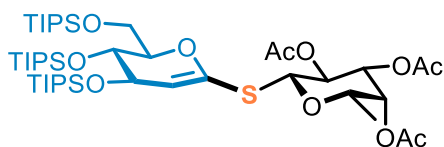

Following the general procedure, starting from thiosugar (30.6 mg, 0.1 mmol) and iodosugar (89 mg, 0.12 mmol), the residue was purified by flash chromatography (EtOAc /cyclohexane = 10:90 ) to provide compound **7d** (80.1 mg, 87%) as a colorless liquid.  $R_f = 0.3$  ((EtOAc/cyclohexane = 1:9);  $[\alpha]_D^{22} = -17.8$  (c, 0.4, DCM);  $^1\text{H NMR}$  (300 MHz, acetone- $d_6$ )  $\delta$  5.34–5.23 (m, 2H), 5.21–5.13 (m, 1H), 5.13–4.99 (m, 2H), 4.49–4.36 (m, 1H), 4.25 (d,  $J = 1.7$  Hz, 1H), 4.17–4.05 (m, 3H), 4.06–3.94 (m, 1H), 2.16 (s, 3H), 2.02 (s, 3H), 1.93 (s, 3H), 1.18 (d,  $J = 3.6$  Hz, 3H), 1.18 – 1.06 (m, 63H);  $^{13}\text{C NMR}$  (75 MHz, acetone- $d_6$ )  $\delta$  170.0, 169.2, 169.1, 146.0, 105.2, 83.3, 82.2, 73.0, 72.0, 70.4, 70.0, 67.2, 67.1, 61.5, 19.6, 17.7, 17.6, 15.7, 12.4, 12.3, 11.9; IR (neat): 2943, 2893, 2866, 2370, 2322, 1743, 1720, 1628, 1458, 1336, 1109, 1066, 880, 830, 680  $\text{cm}^{-1}$ ; HRMS (ESI):  $m/z$  calc. for  $\text{C}_{45}\text{H}_{86}\text{NaO}_{11}\text{SSi}_3$   $[\text{M}+\text{Na}]^+$  941.5091; found 941.5089.

*(2S,3R,4S,5R,6R)-2-(((2R,3R)-3,4-bis((triisopropylsilyl)oxy)-2-(((triisopropylsilyl)oxy)methyl)-3,4-dihydro-2H-pyran-6-yl)thio)-6-methyltetrahydro-2H-pyran-3,4,5-triol*

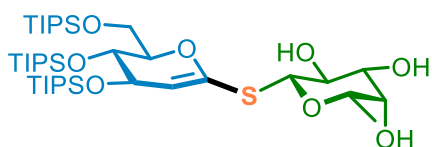

Following the general procedure, starting from thiosugar (18 mg, 0.1 mmol) and iodosugar (89 mg, 0.12 mmol), the residue was purified by flash chromatography (EtOAc/cyclohexane = 10:90 ) to provide compound **7e** (44.5 mg, 57%) as a colorless liquid.  $R_f = 0.3$  ((MeOH/cyclohexane = 5:95); colorless liquid;  $[\alpha]_D^{22} = -15.7$  (c, 0.3, DCM);  $^1\text{H NMR}$  (300 MHz, MeOD)  $\delta$  5.30 (d,  $J = 3$  Hz, 1H), 4.97–4.87 (m, 1H), 4.42 (bs, 1H), 4.26 (s, 1H), 4.22–4.03 (m, 3H), 3.76–3.65 (m, 2H), 3.62–3.47 (m,

2H), 3.46–3.42 (m, 3H), 1.31 (d,  $J = 6$  Hz, 3H), 1.26–0.96 (m, 63H);  $^{13}$ CNMR (75 MHz, MeOD)  $\delta$  145.5, 103.5, 83.4, 81.9, 74.0, 73.4, 70.5, 68.8, 68.1, 66.0, 60.4, 16.0, 14.5, 11.1, 11.0, 10.7; IR (neat): 3310, 2943, 2893, 2866, 2370, 2322, 11759, 1627, 1463, 1340, 1219, 1109, 1085, 881, 830, 655  $\text{cm}^{-1}$ ; HRMS (ESI):  $m/z$  calc. for  $\text{C}_{39}\text{H}_{80}\text{NaO}_8\text{SSi}_3$   $[\text{M}+\text{Na}]^+$  815.4774; found 815.4777.

*((2R,3S,4R,5R)-5-(acetoxymethyl)-6-(((2R,3R,4S,5R,6S)-4,5-diacetoxy-2-(acetoxymethyl)-6-(((2R,3R)-3,4-bis((triisopropylsilyl)oxy)-2-(((triisopropylsilyl)oxy)methyl)-3,4-dihydro-2H-pyran-6-yl)thio)tetrahydro-2H-pyran-3-yl)oxy)tetrahydro-2H-pyran-2,3,4-triyl triacetate*

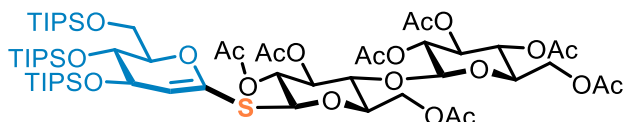

Following the general procedure, starting from thiodisaccharde (65 mg, 0.1 mmol) and iodose (89 mg, 0.12 mmol), the residue was purified by flash chromatography (EtOAc/cyclohexane = 10:90) to provide compound **7f** (88.4 mg, 70%) as a colorless liquid.  $R_f = 0.3$  (EtOAc/cyclohexane = 3:7);  $[\alpha]_D^{22} = -37.1$  (c, 0.5, DCM);  $^1\text{H}$  NMR (300 MHz, acetone- $d_6$ )  $\delta$  5.28–5.12 (m, 2H), 5.06 (d,  $J = 9.9$ , 1H), 5.02 (d,  $J = 8.1$ , 1H), 4.95–4.77 (m, 3H), 4.58–4.27 (m, 3H), 4.26–3.89 (m, 9H), 3.83–3.70 (m, 1H), 2.17–1.85 (m, 21H), 1.23–1.01 (m, 63H);  $^{13}$ CNMR (75 MHz, acetone- $d_6$ )  $\delta$  170.0, 169.8, 169.7, 169.4, 169.1, 168.9, 168.8, 168.6, 147.2, 103.2, 100.4, 83.6, 83.0, 76.6, 76.0, 73.4, 72.7, 71.4, 68.0, 67.3, 62.0, 61.5, 19.7, 17.7, 17.6, 12.4, 12.3, 11.9; IR (neat): 2943, 2891, 2866, 2360, 2341, 1746, 1380, 1366, 1228, 1216, 1097, 1043, 830, 774, 680  $\text{cm}^{-1}$ ; HRMS (ESI):  $m/z$  calc. for  $\text{C}_{59}\text{H}_{104}\text{O}_{21}\text{SSi}_3$   $[\text{M}+\text{Na}]^+$  1287.5991; found 1287.5994.

*(((2R,3R)-6-((4-chlorophenyl)thio)-2-(((triisopropylsilyl)oxy)methyl)-3,4-dihydro-2H-pyran-3,4-diyl)bis(oxy))bis(triisopropylsilane)*

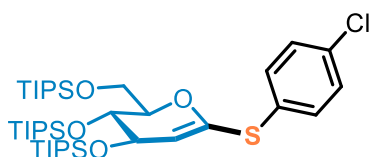

Following the general procedure, starting from 4-chlorobenzenethiol (14.3 mg, 0.1 mmol) and iodose (89 mg, 0.12 mmol), the residue was purified by flash chromatography (cyclohexane) to provide compound **7g** (31.6 mg, 42%) as a colorless liquid.  $R_f = 0.5$  (cyclohexane);  $[\alpha]_D^{22} = -25.6$  (c, 0.4, DCM);  $^1\text{H}$  NMR (300 MHz, acetone- $d_6$ )  $\delta$  7.46 (d,  $J = 8.5$  Hz, 2H), 7.35 (d,  $J = 8.4$  Hz, 2H), 5.44 (d,  $J = 5.3$  Hz, 1H), 4.53–4.34 (m, 1H), 4.28–4.09 (m, 2H), 4.08–3.93 (m, 2H), 1.22–0.84 (m, 63H);  $^{13}$ CNMR (75 MHz, acetone- $d_6$ )  $\delta$  131.3, 128.9, 106.8, 83.8, 83.0, 69.4, 67.1, 61.8, 17.5, 12.3, 12.2, 11.9; IR (neat): 2943, 2891, 2866, 2364, 2322, 1744, 1463, 1232, 1107, 1066, 1014, 881, 806, 678  $\text{cm}^{-1}$ ; HRMS (ESI):  $m/z$  calc. for  $\text{C}_{39}\text{H}_{73}\text{ClNaO}_4\text{SSi}_3$   $[\text{M}+\text{Na}]^+$  779.4118; found 779.4116.

*(((2R,3R)-6-(((3S,5S,7S)-adamantan-1-yl)thio)-2-(((triisopropylsilyl)oxy)methyl)-3,4-dihydro-2H-pyran-3,4-diyl)bis(oxy))bis(triisopropylsilane)*



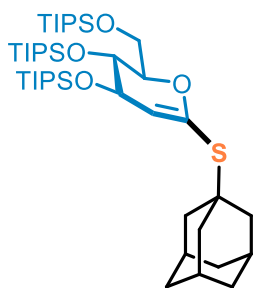

Following the general procedure, starting from adamantane-1-thiol (16.8 mg, 0.1 mmol) and iodosugar (89 mg, 0.12 mmol), the residue was purified by flash chromatography (cyclohexane) to provide compound **7h** (69.7 mg, 89%) as a colorless liquid.  $R_f = 0.5$  (cyclohexane);  $[\alpha]_D^{22} = -56.8$  (c, 0.8, DCM);  $^1\text{H NMR}$  (300 MHz, Acetone- $d_6$ )  $\delta$  5.31 (dd,  $J = 5.3, 1.6$  Hz, 1H), 4.39 (m,  $J = 7.5$ , 1H), 4.20 – 4.07 (m, 3H), 4.02 (dd,  $J = 11.2, 4.4$  Hz, 1H), 2.80 – 2.56 (m, 1H), 2.03 – 1.92 (m, 9H), 1.71 (m, 6H), 1.21 – 1.02 (m, 63H).  $^{13}\text{CNMR}$  (75 MHz, acetone- $d_6$ )  $\delta$  149.8, 125.9, 84.1, 70.2, 68.0, 63.1, 44.8, 36.9, 31.0, 30.3, 18.5, 13.2, 12.8; IR (neat): 2947, 2888, 2379, 2341, 1767, 1366, 1228, 1216, 1087, 1043, 830, 795,  $\text{cm}^{-1}$ ; HRMS (ESI):  $m/z$  calc. for  $\text{C}_{43}\text{H}_{84}\text{O}_4\text{SSi}_3$   $[\text{M}+\text{Na}]^+$  803.5290; found 803.5297.

#### 4. Referecnce

1. M. Liu, Y. Niu, Y. F. Wu, X. S. Ye. *Org. Lett.* **2017**, 19, 13, 3608
2. S. ZHANG, Y. H. Niu, X. S. Ye. *Org. Lett.* **2016**, 18, 8, 1836
3. S. Verhoog, C. W. Kee, Y. Wang, T. Khotavivattana, T. C. Wilson, V. Kersemans, S. Smart, M. Tredwell, B. G. Davis and V. Gouverneur. *J. Am. Chem. Soc.*, **2018**, 140, 5, 1572–1575
4. R. Frei, J. Waser, *J. Am. Chem. Soc.*, **2013**, 135, 9620.
5. J. M. Chalker, C. S. C. Wood, B. G. Davis, *J. Am. Chem. Soc.*, **2009**, 131, 16346

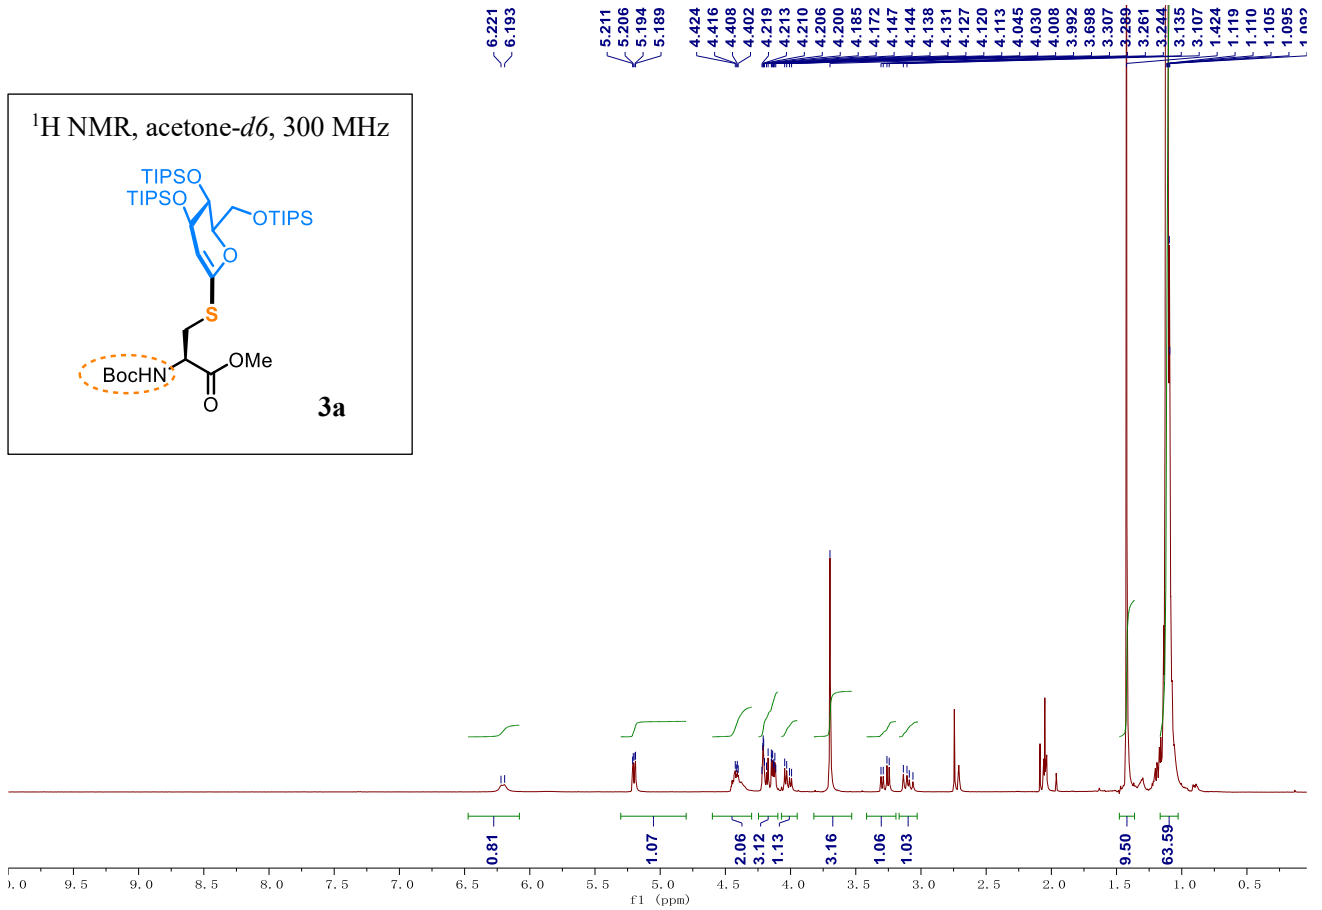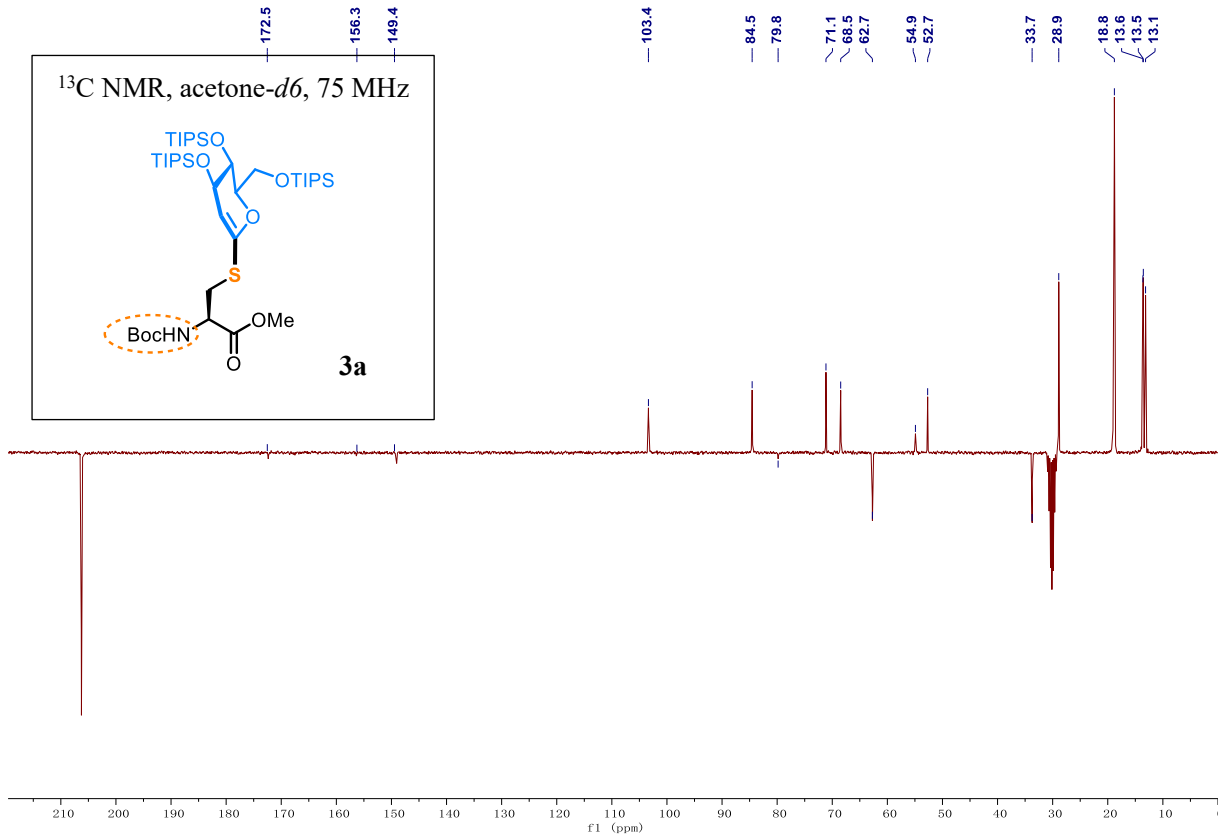

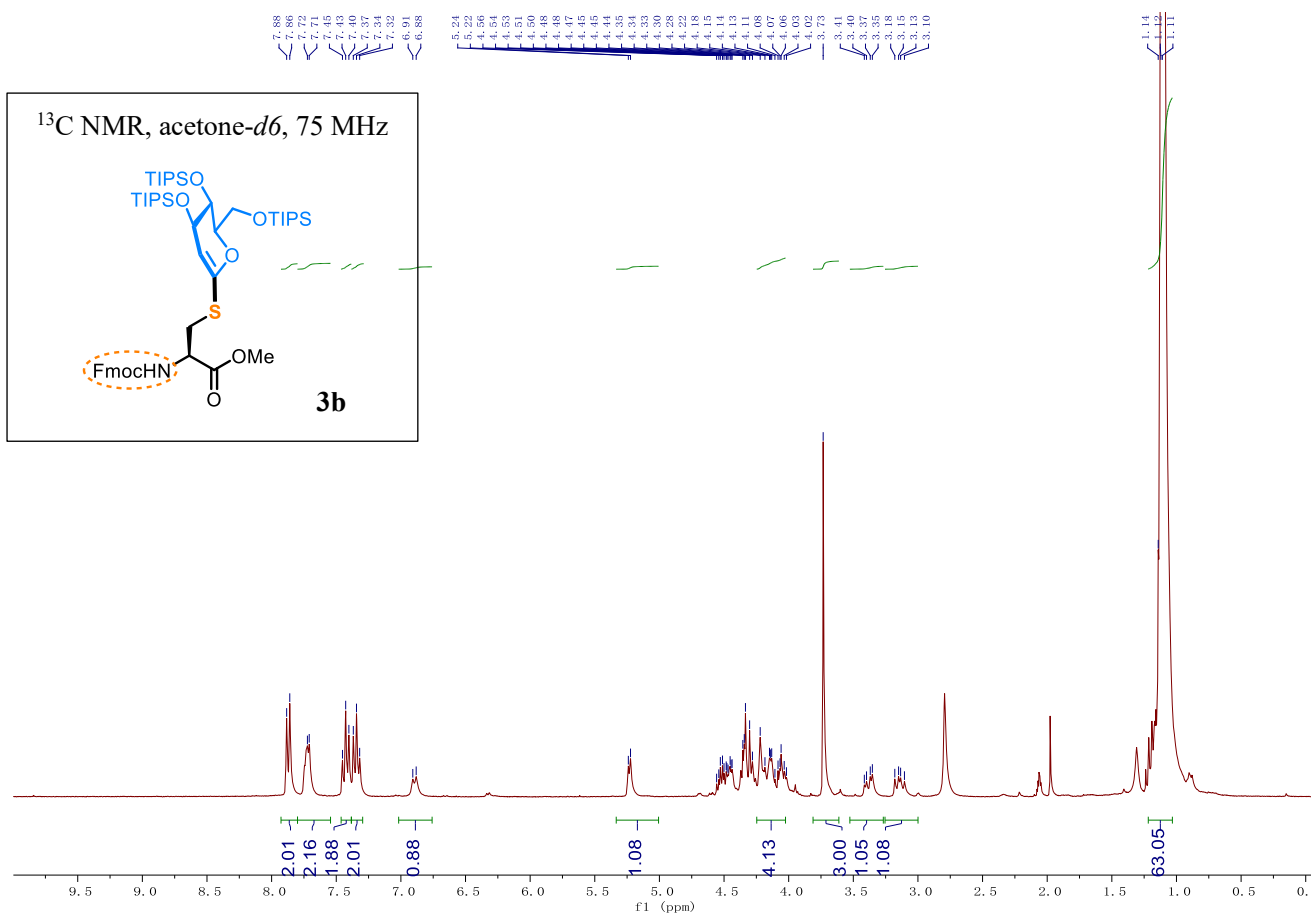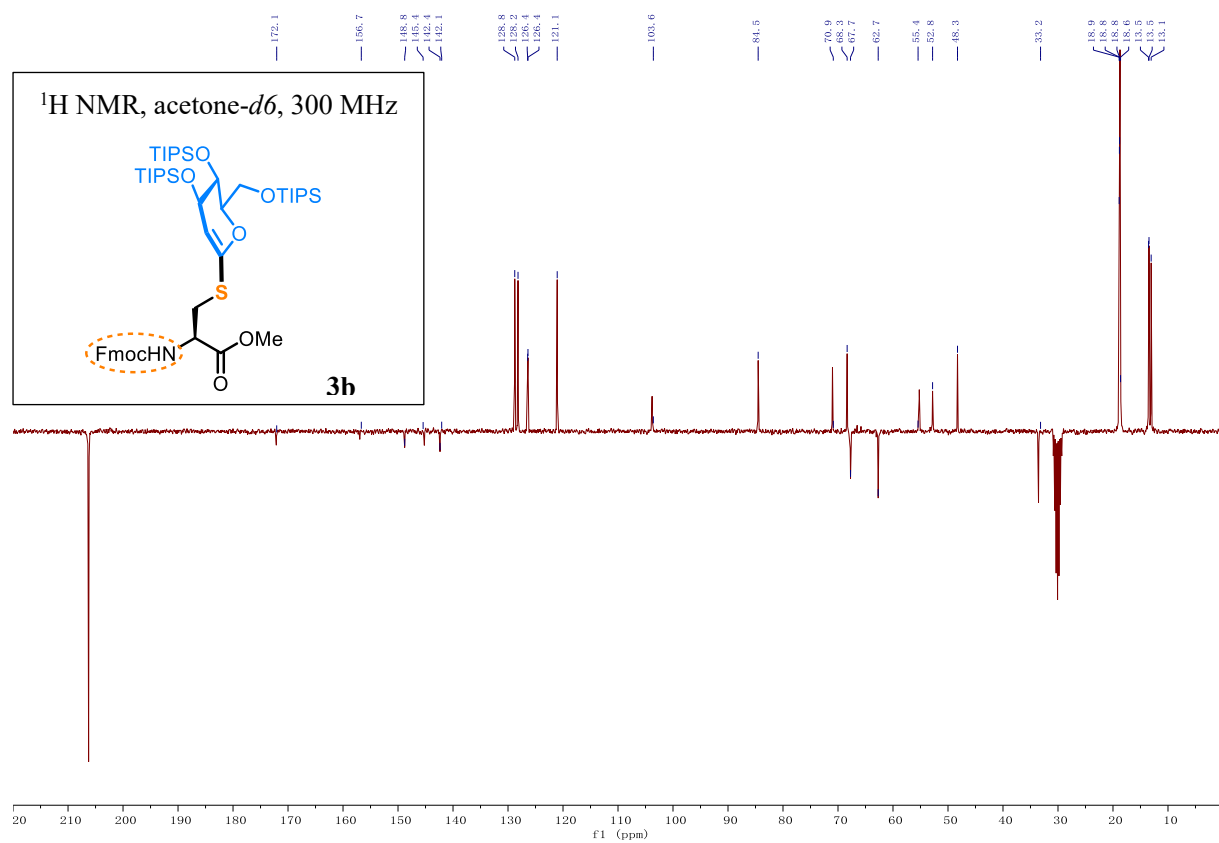

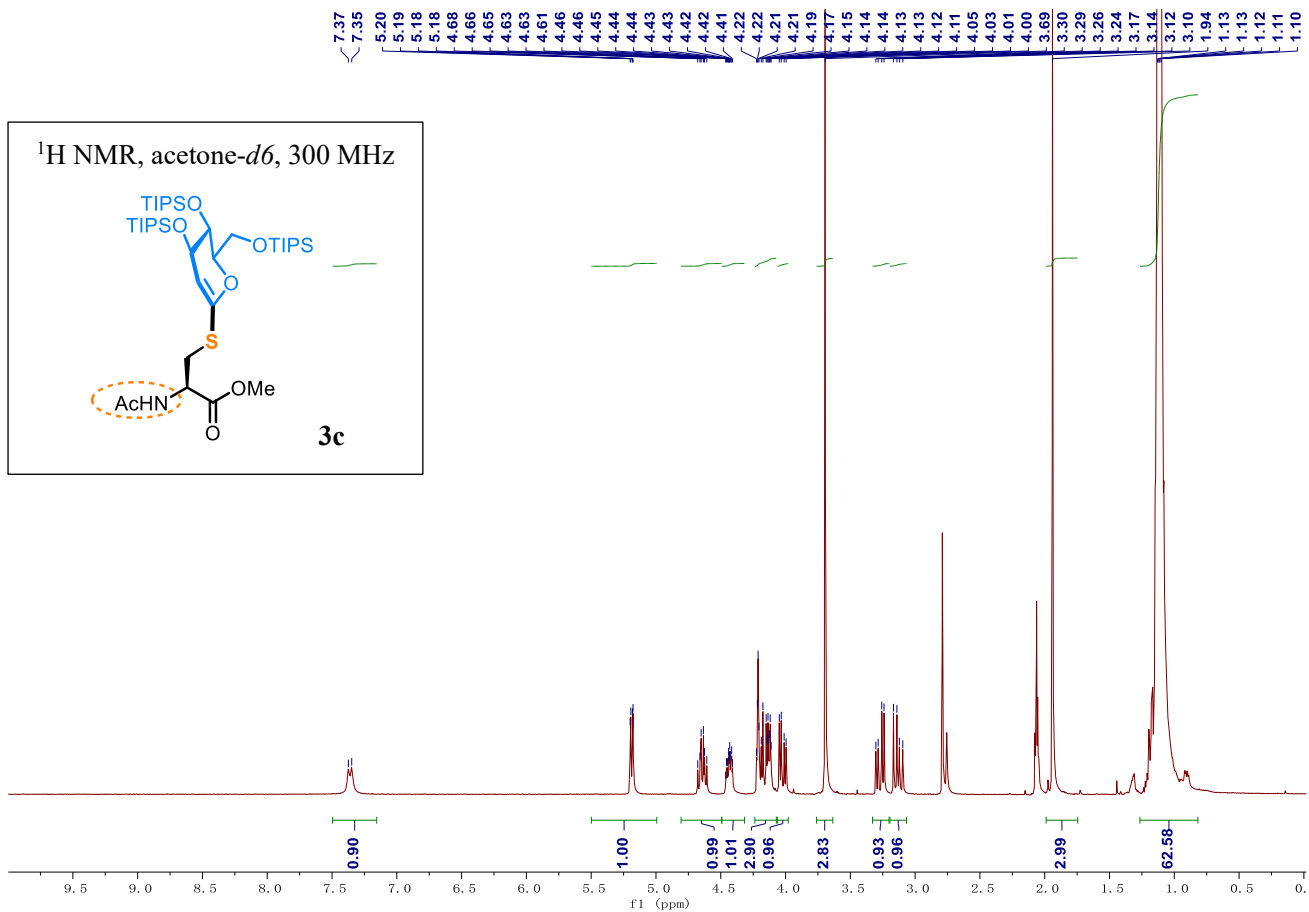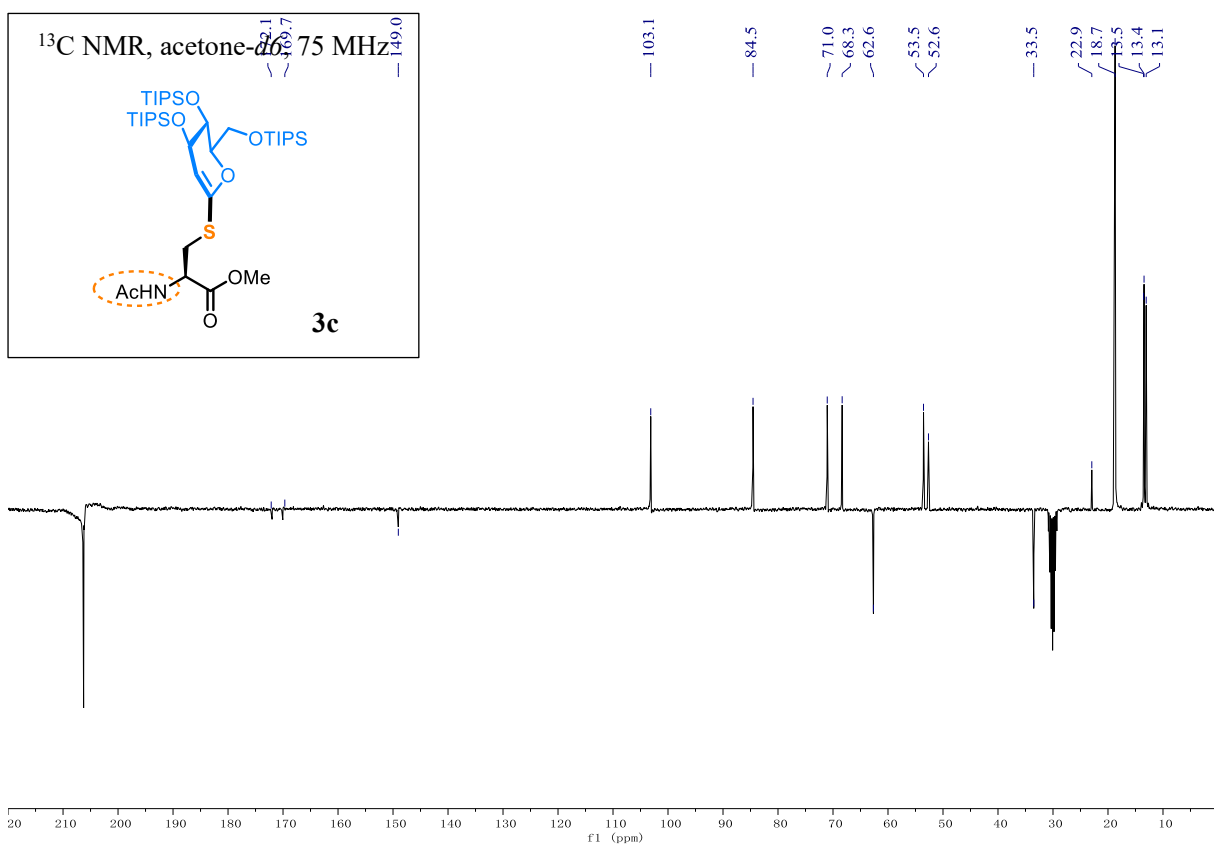

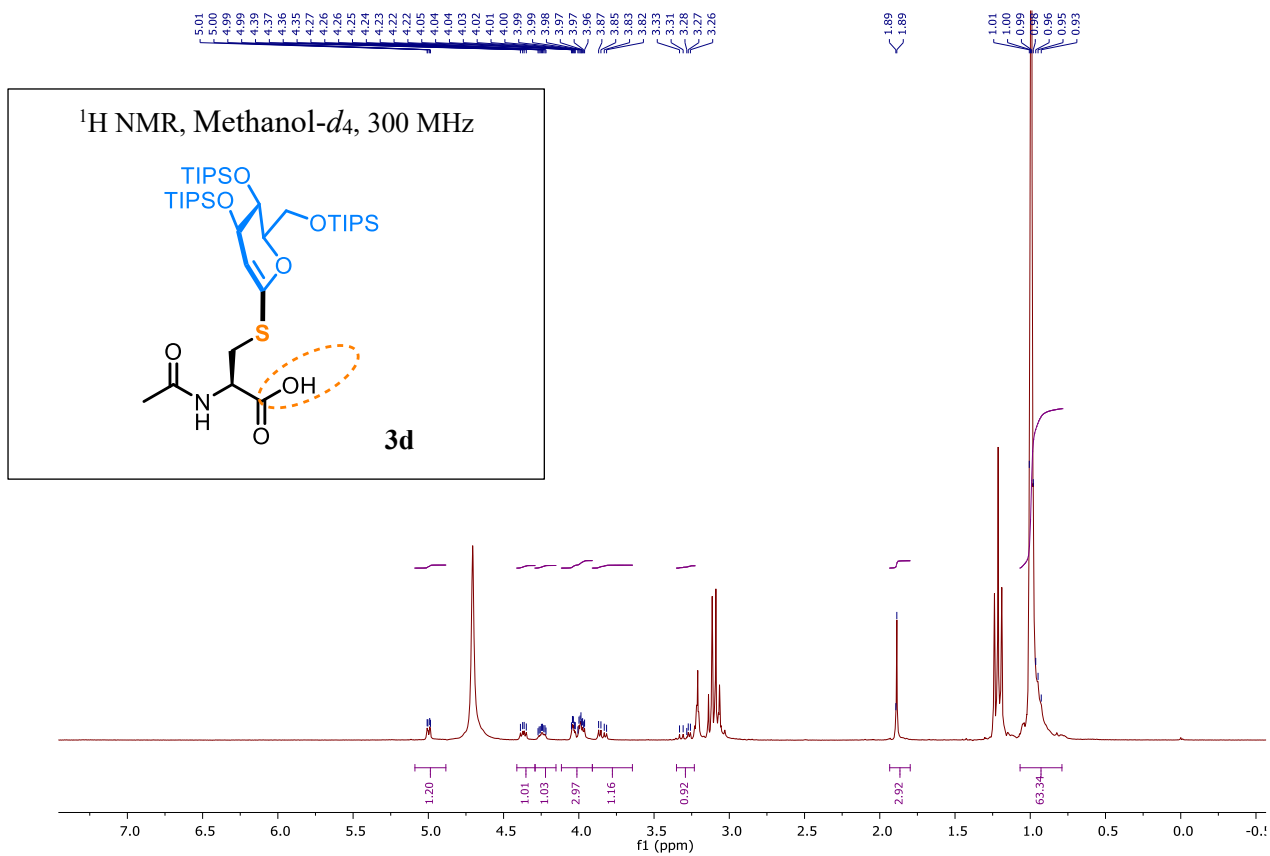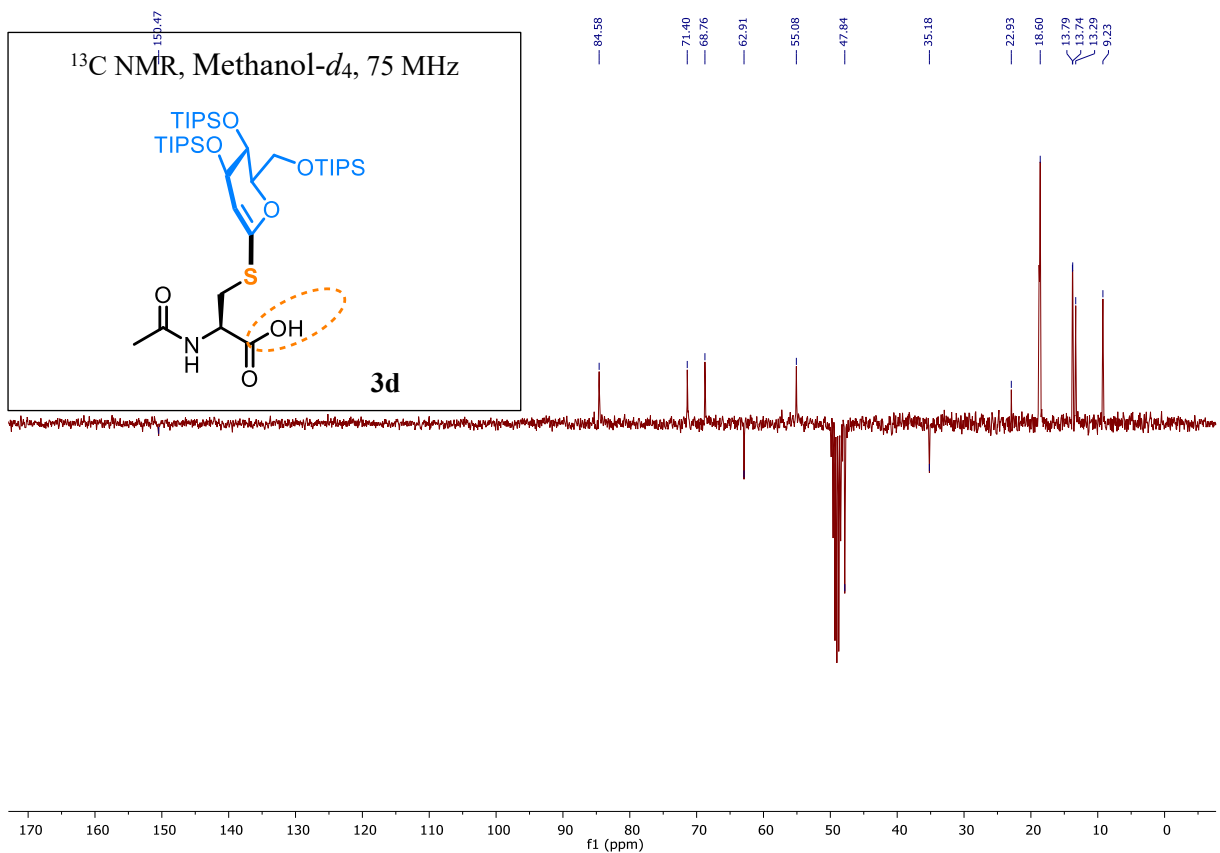

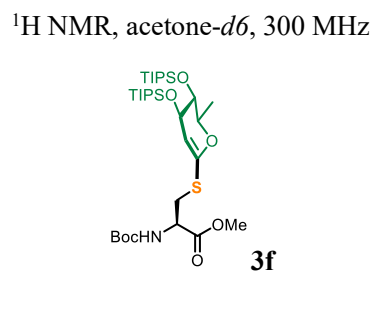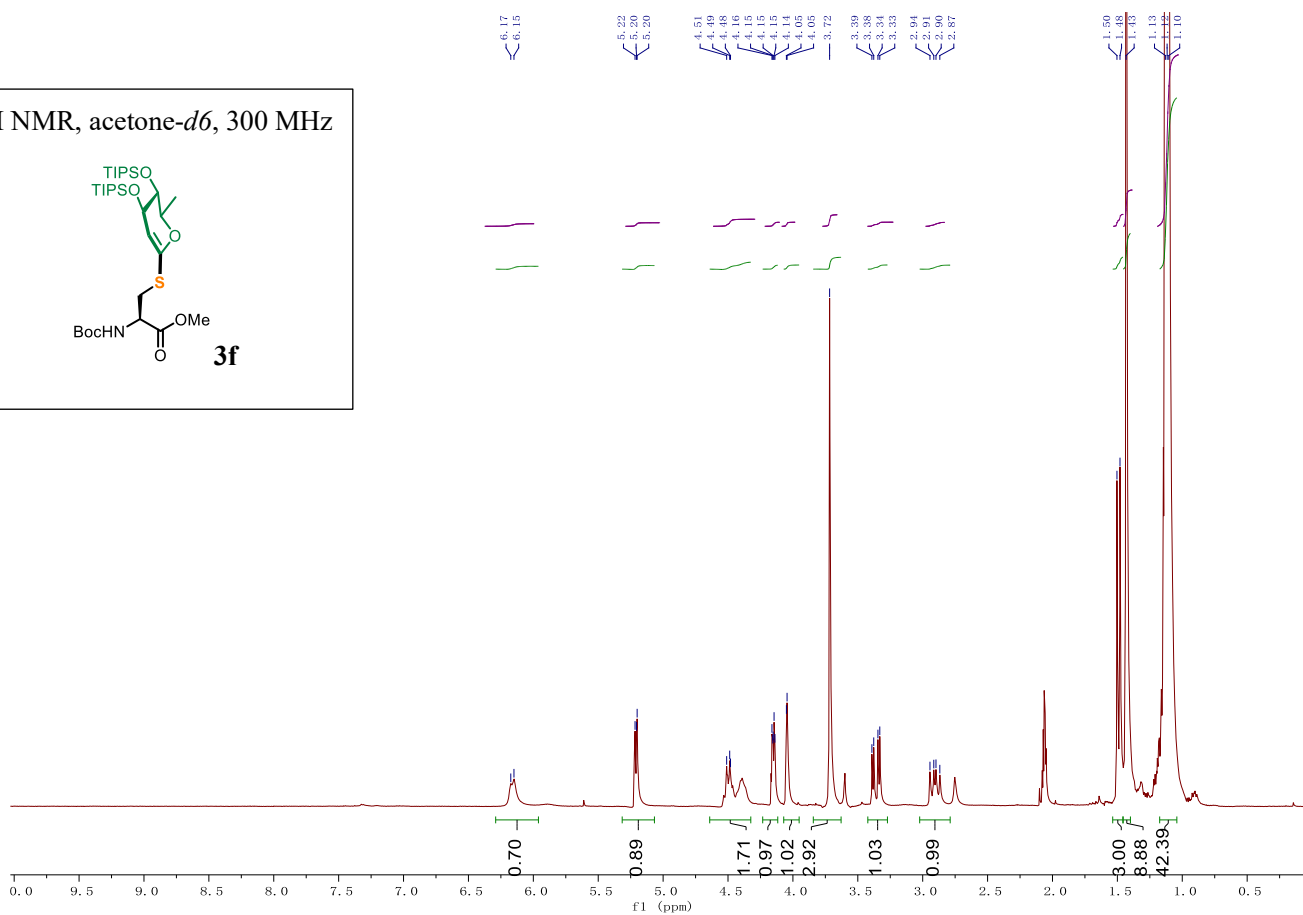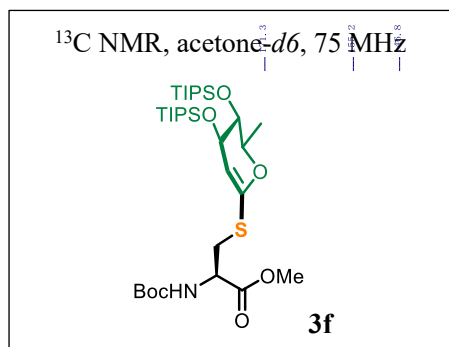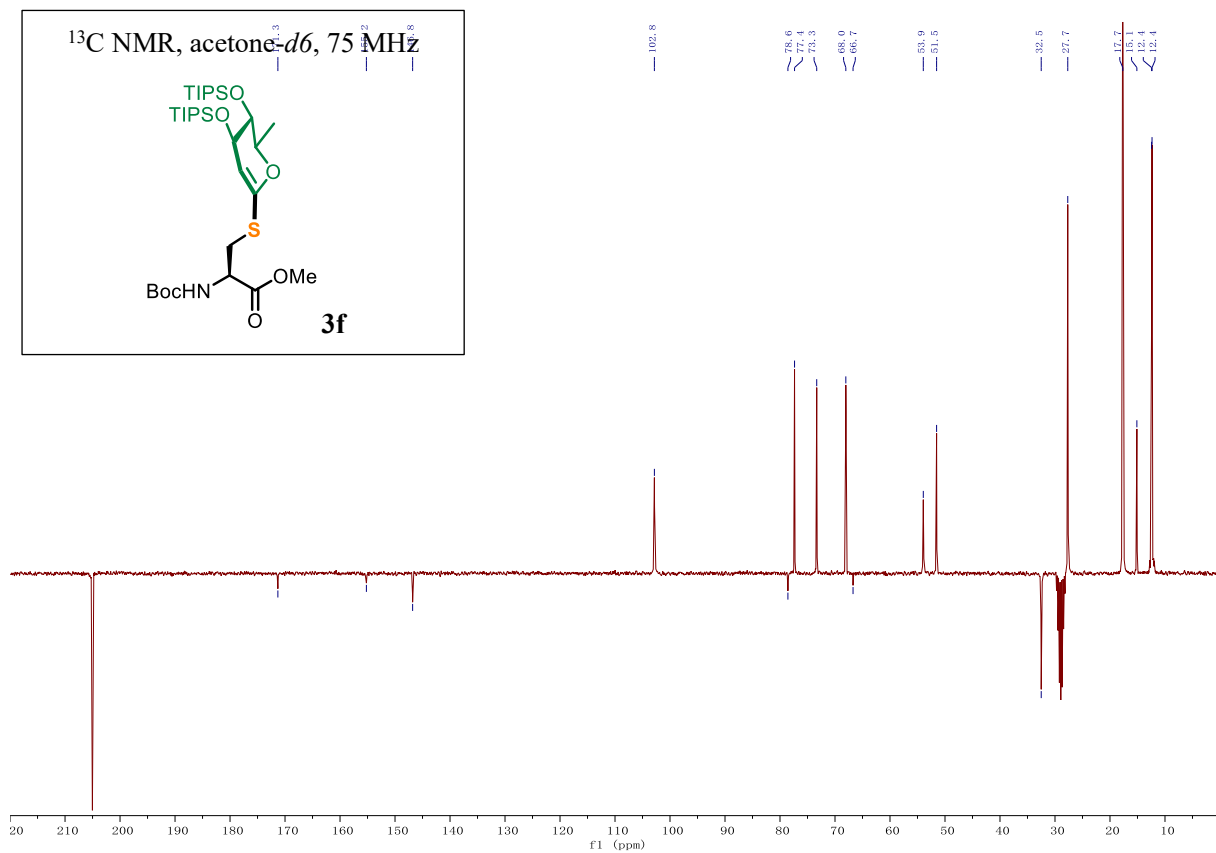

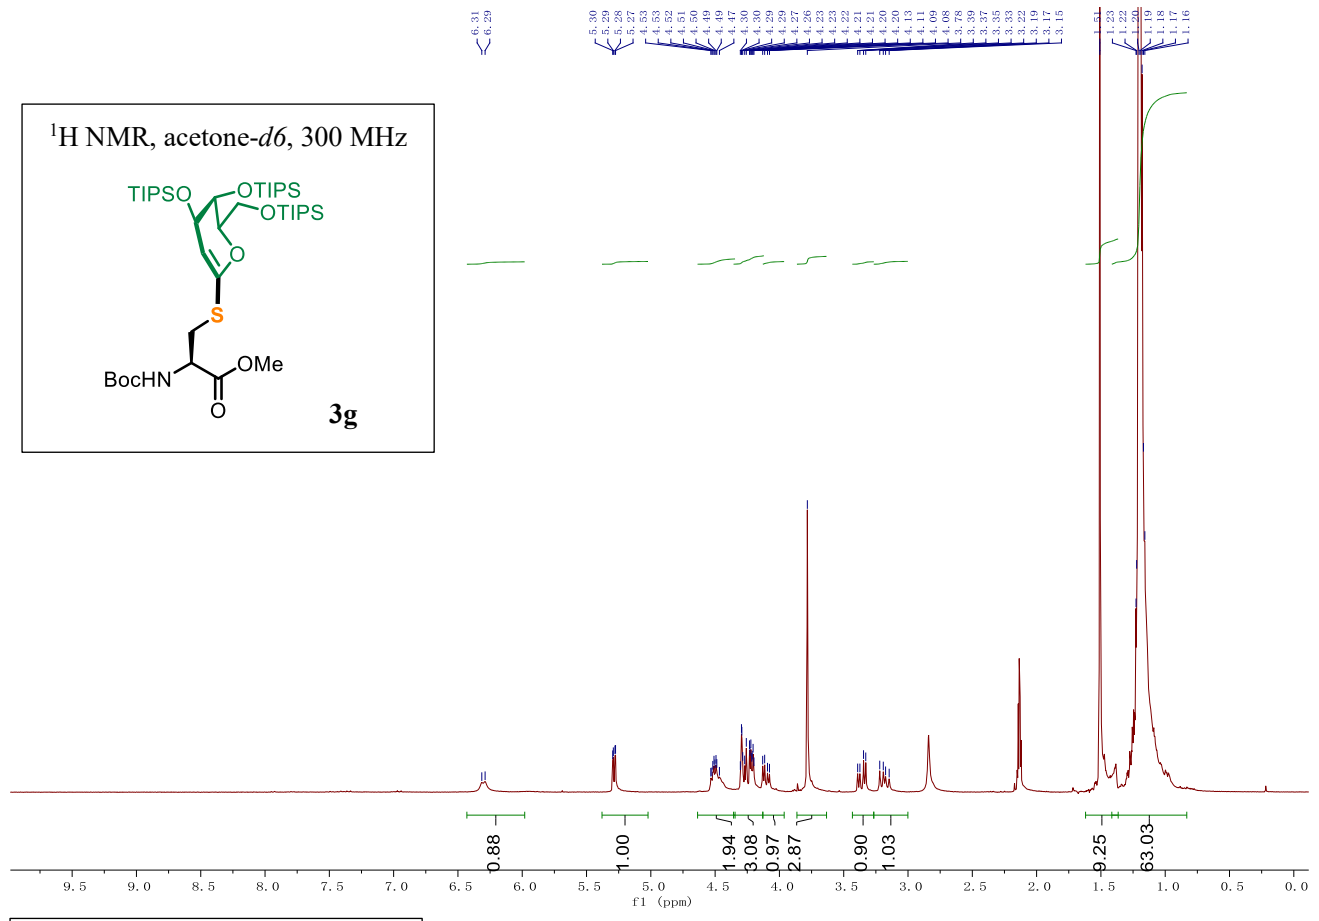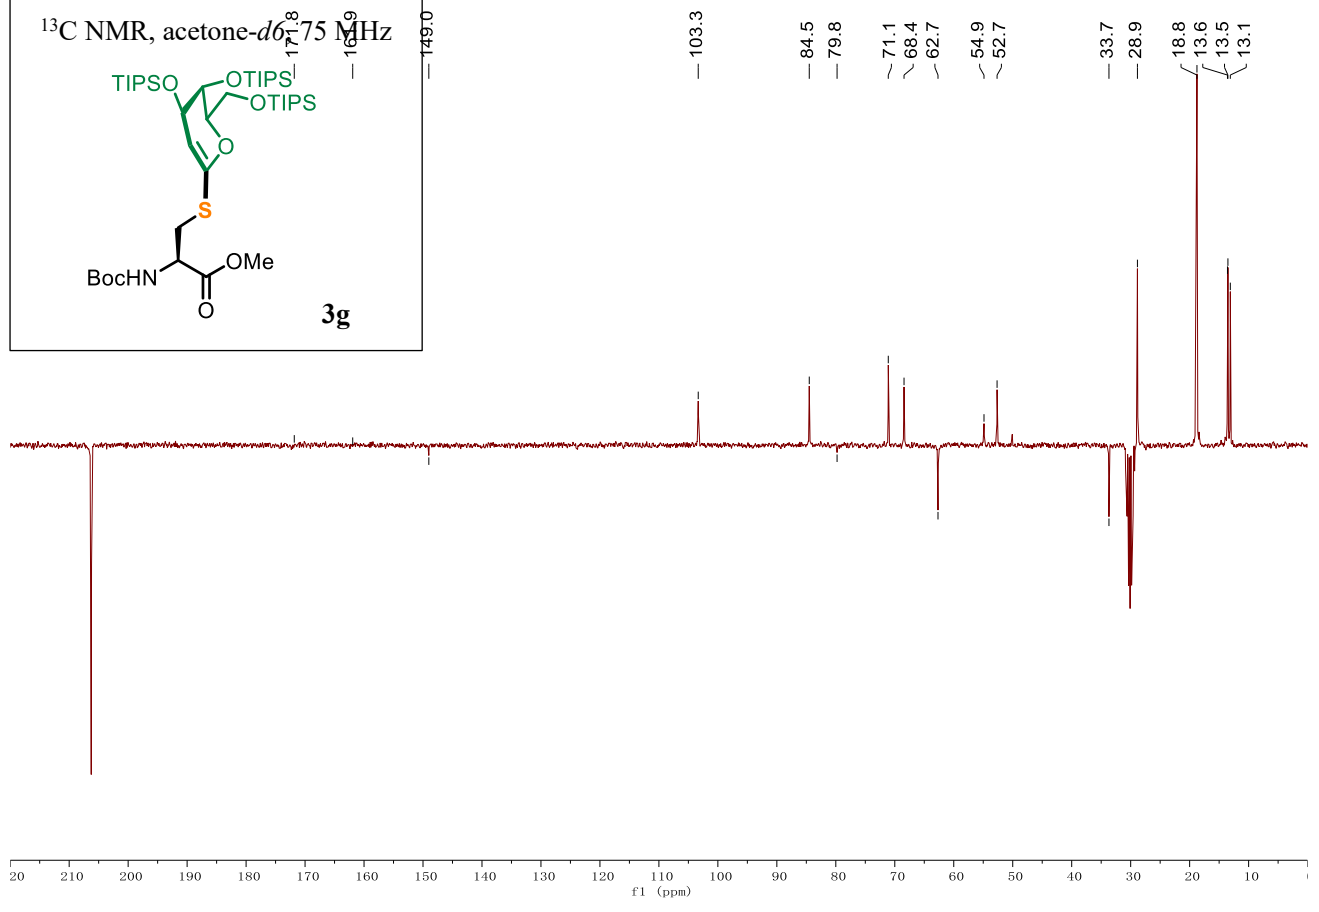

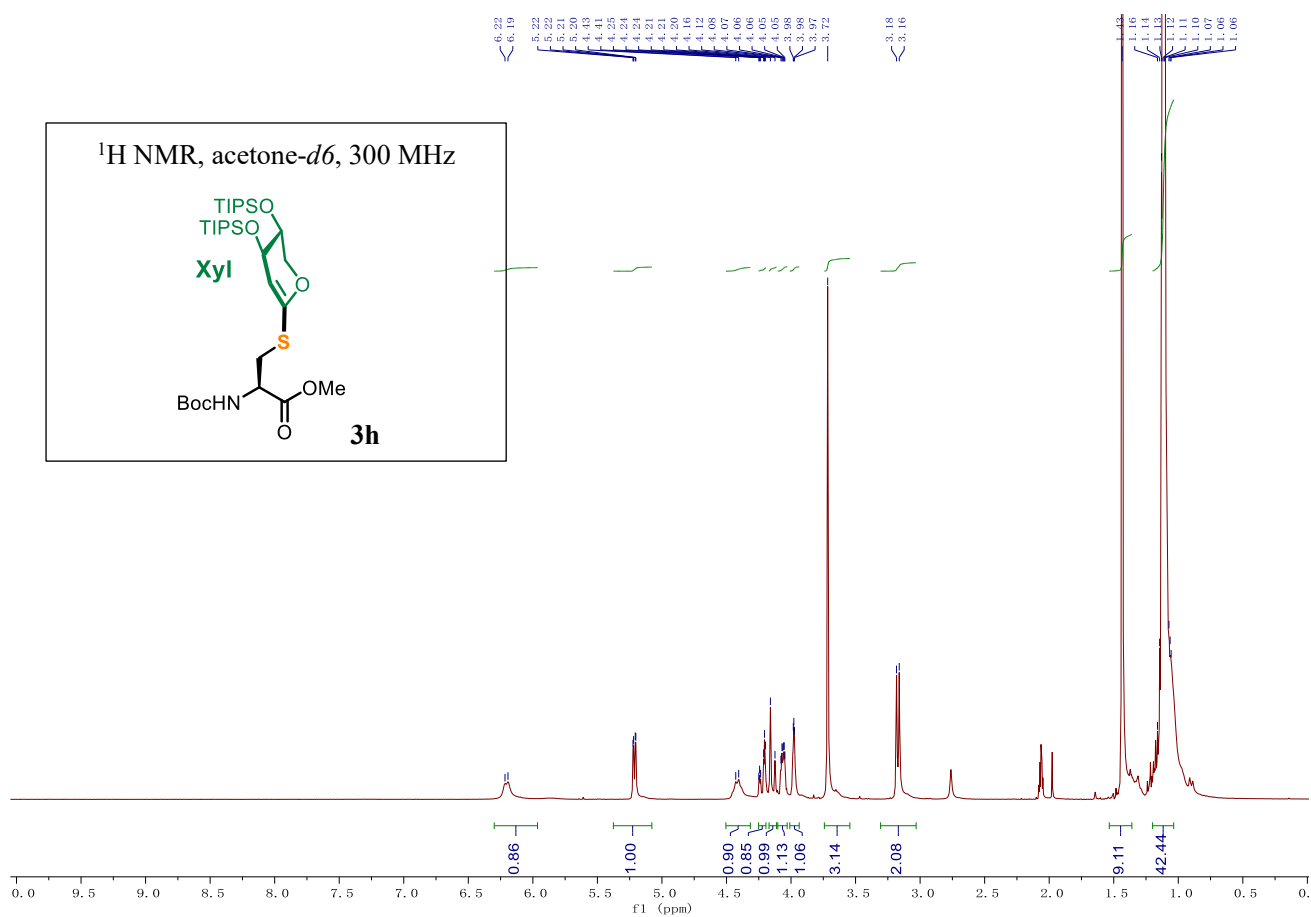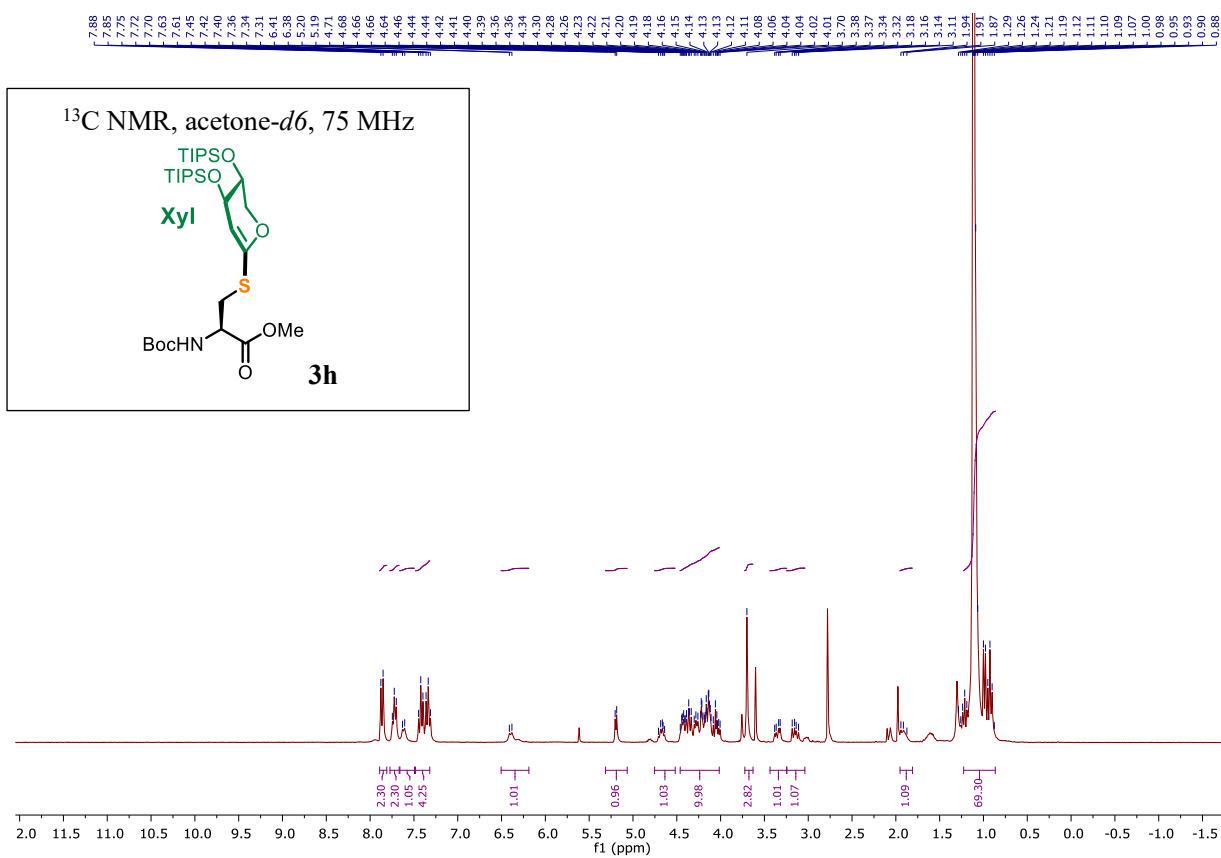



7.42  
7.40  
7.36  
7.34  
7.31  
6.41  
6.38  
5.20  
5.19  
4.71  
4.68  
4.66  
4.64  
4.46  
4.44  
4.44  
4.42  
4.41  
4.40  
4.39  
4.36  
4.36  
4.34  
4.30  
4.28  
4.26  
4.23  
4.22  
4.21  
4.20  
4.19  
4.18  
4.16  
4.15  
4.14  
4.13  
4.12  
4.11  
4.08  
4.06  
4.04  
4.04  
4.02  
4.01  
3.70  
3.38  
3.37  
3.34  
3.32  
3.16  
3.16  
3.14  
3.11  
3.11  
1.94  
1.91  
1.87  
1.29  
1.26  
1.24  
1.21  
1.19

<sup>1</sup>H NMR, acetone-*d*<sub>6</sub>, 300 MHz

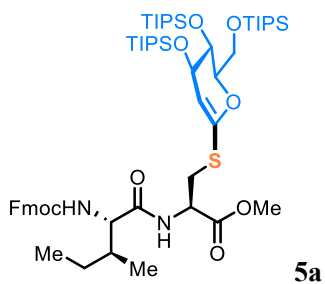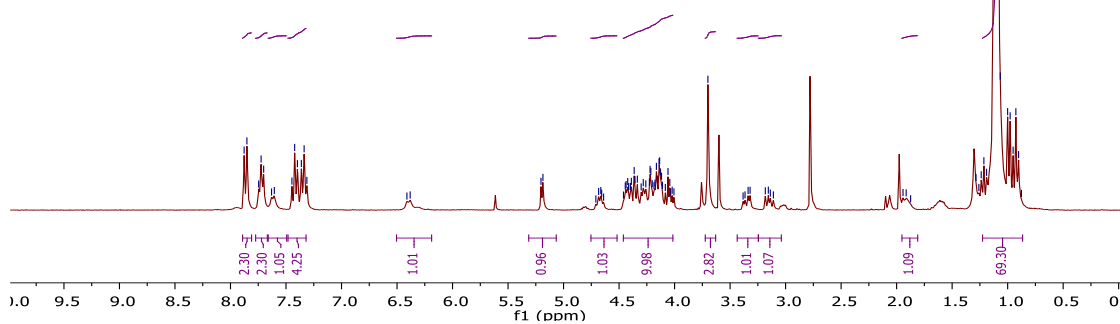

<sup>13</sup>C NMR, acetone-*d*<sub>6</sub>, 75 MHz

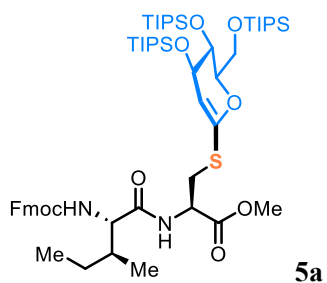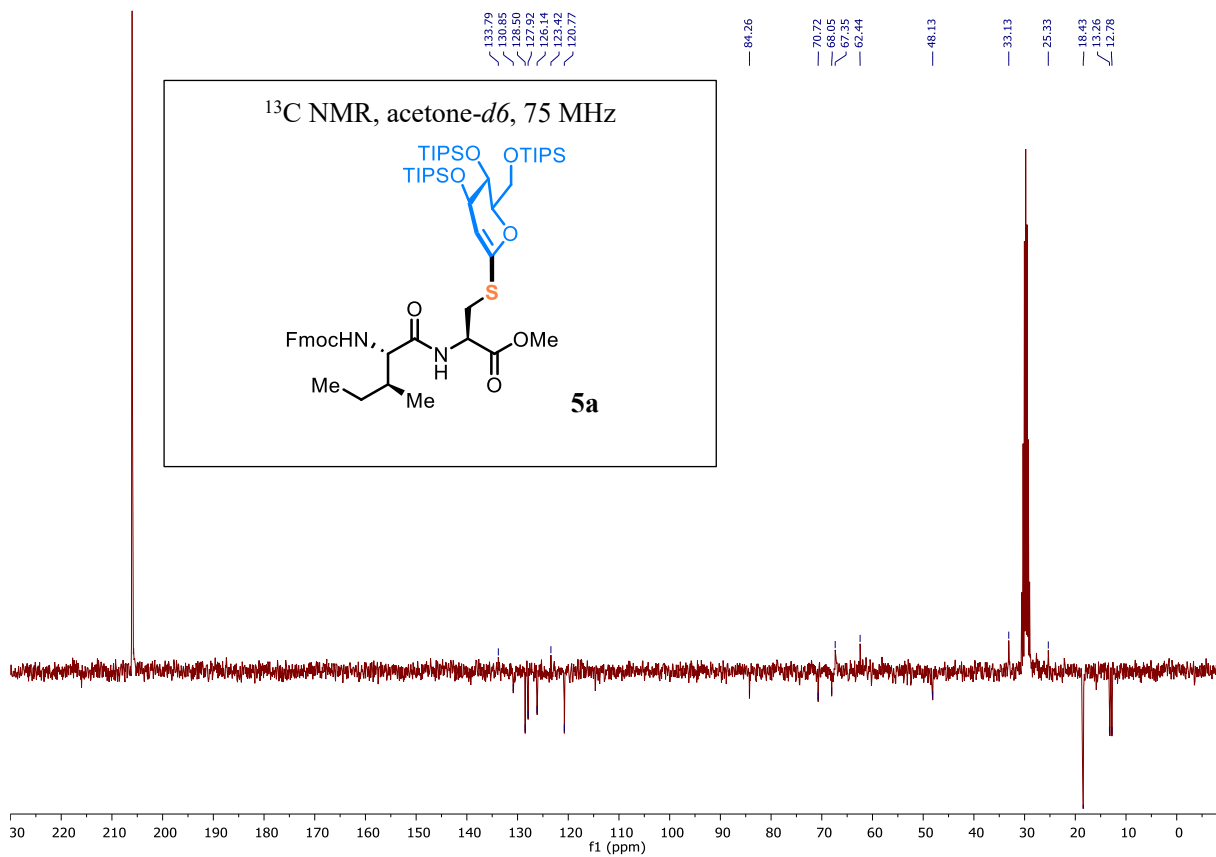

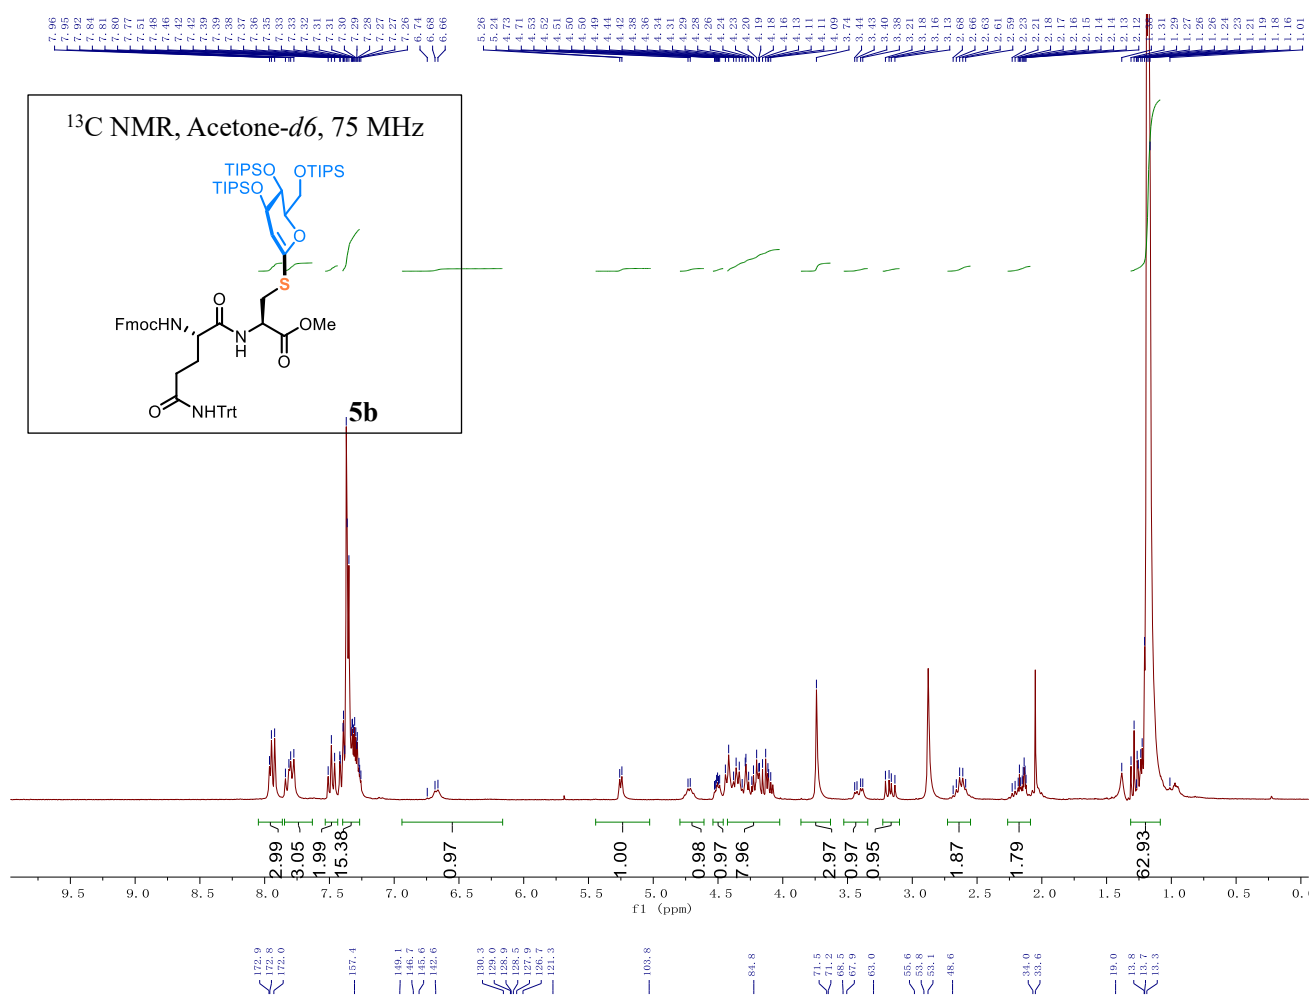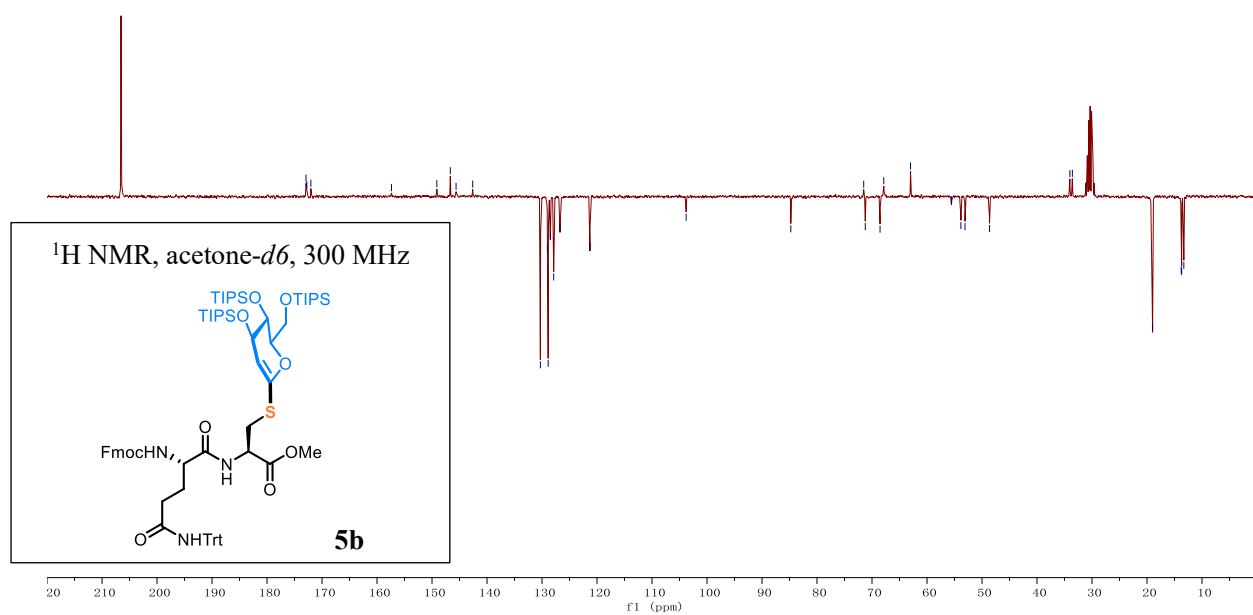

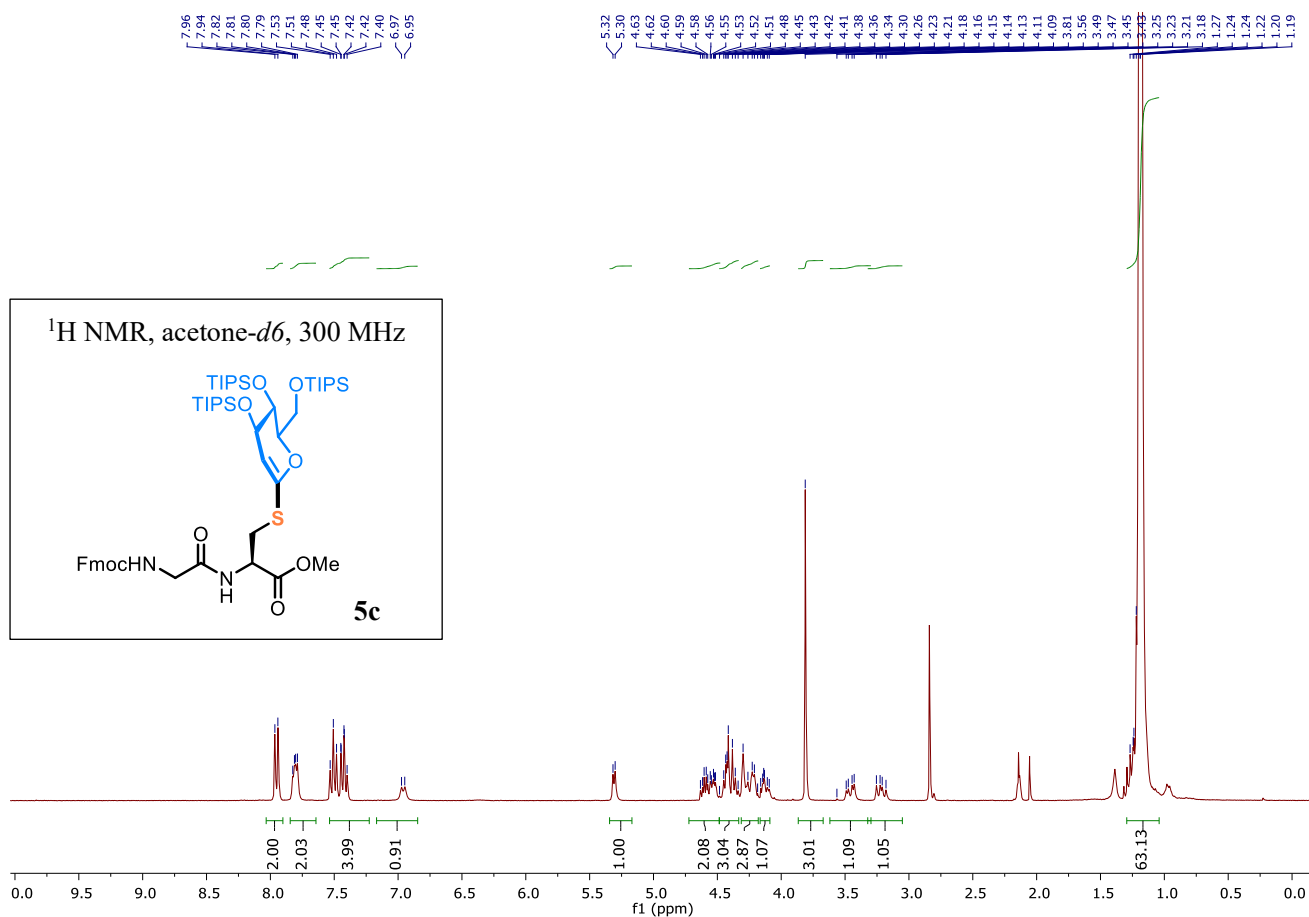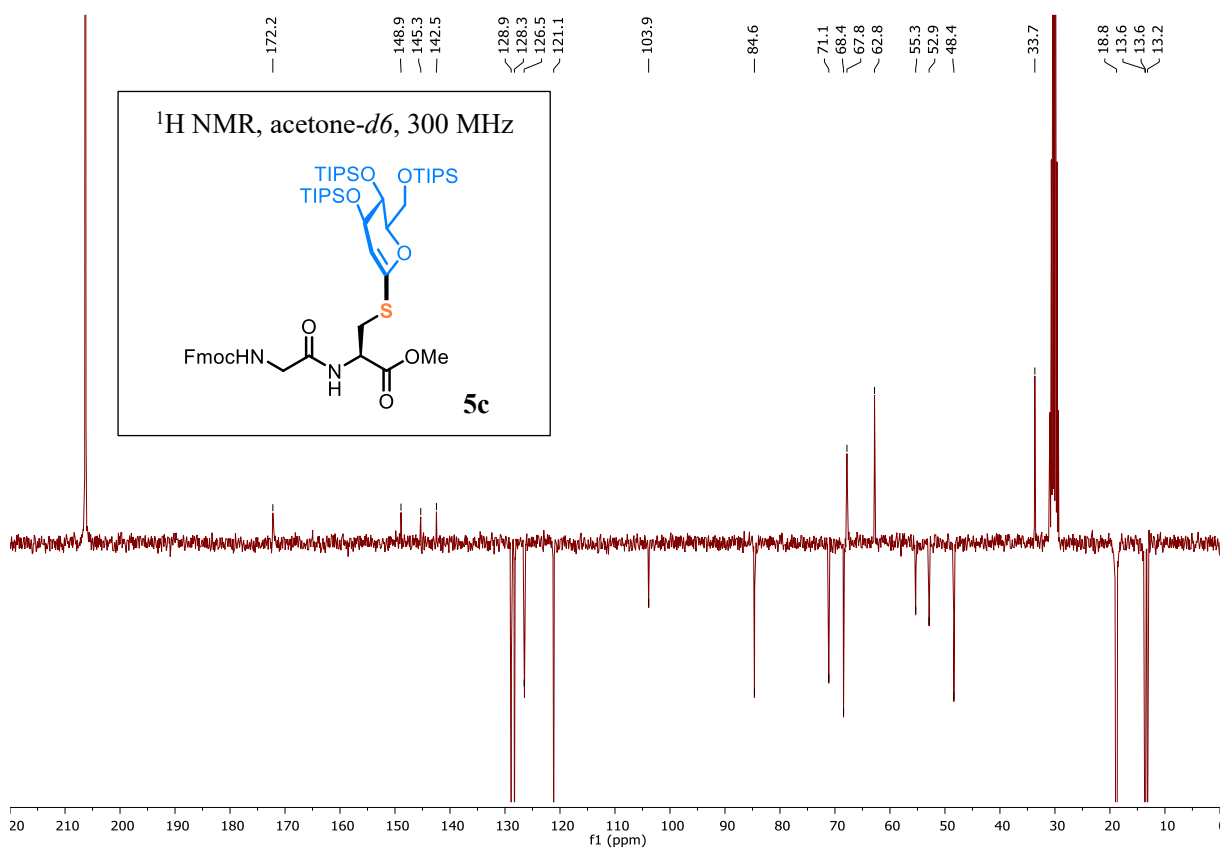

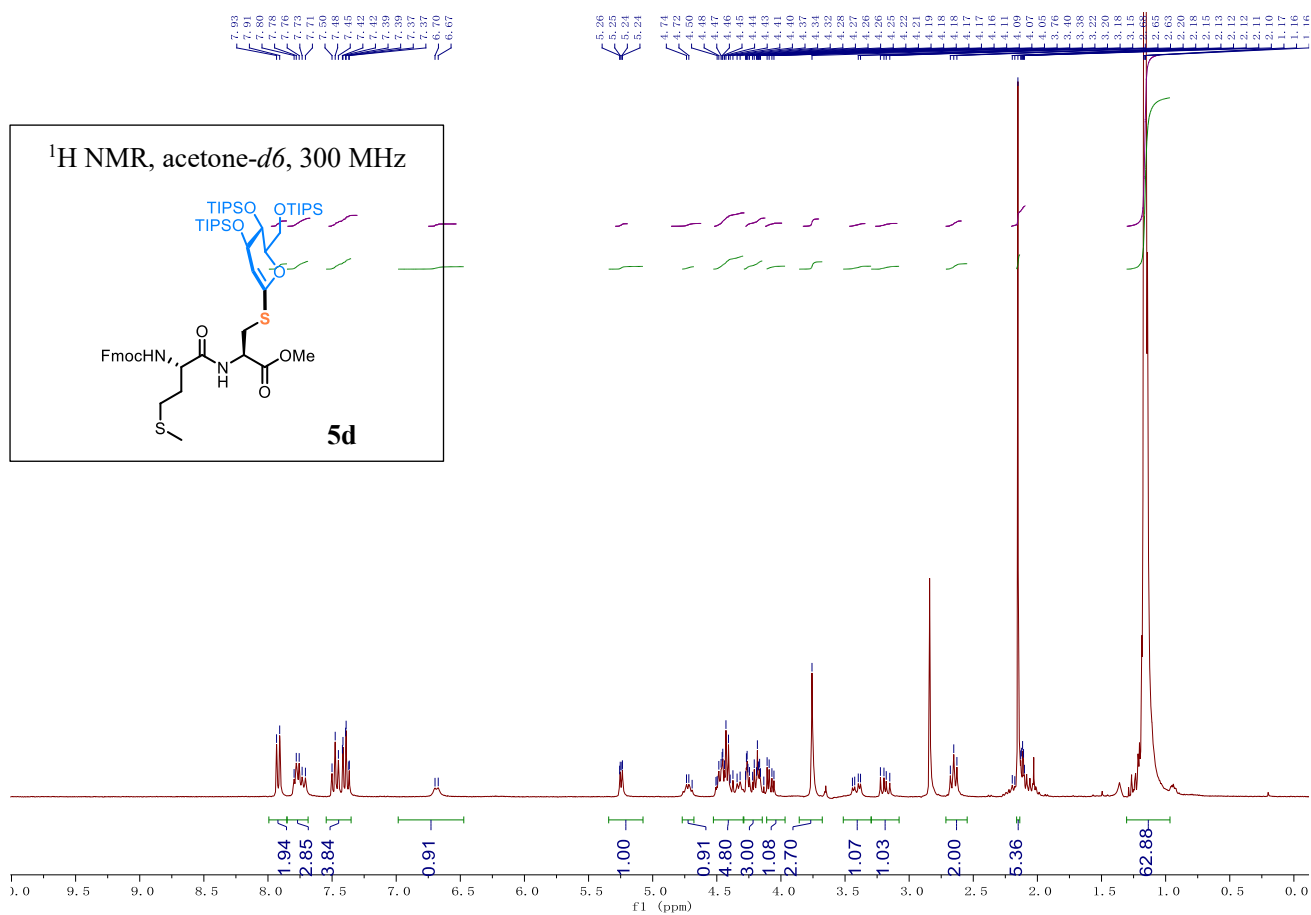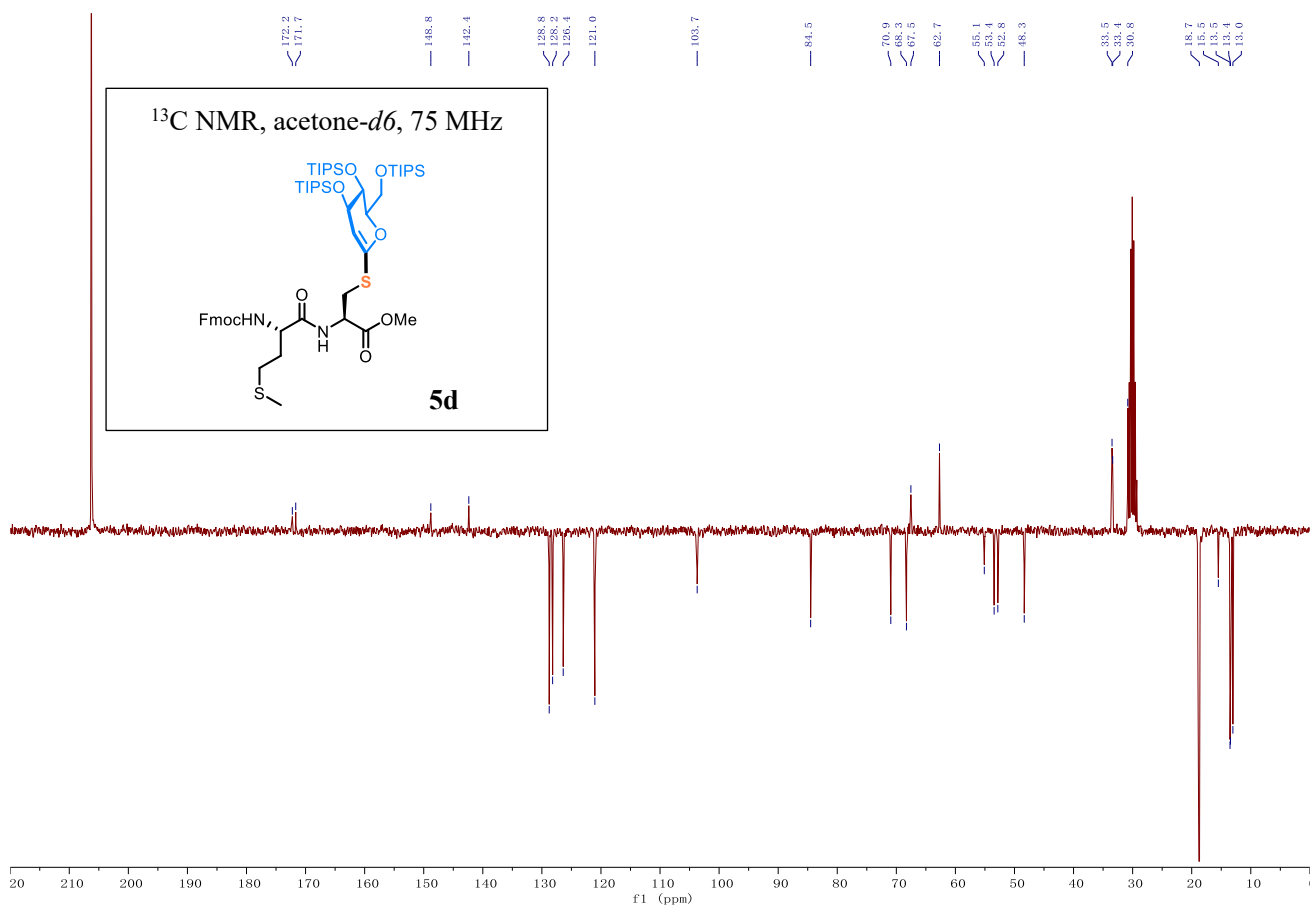

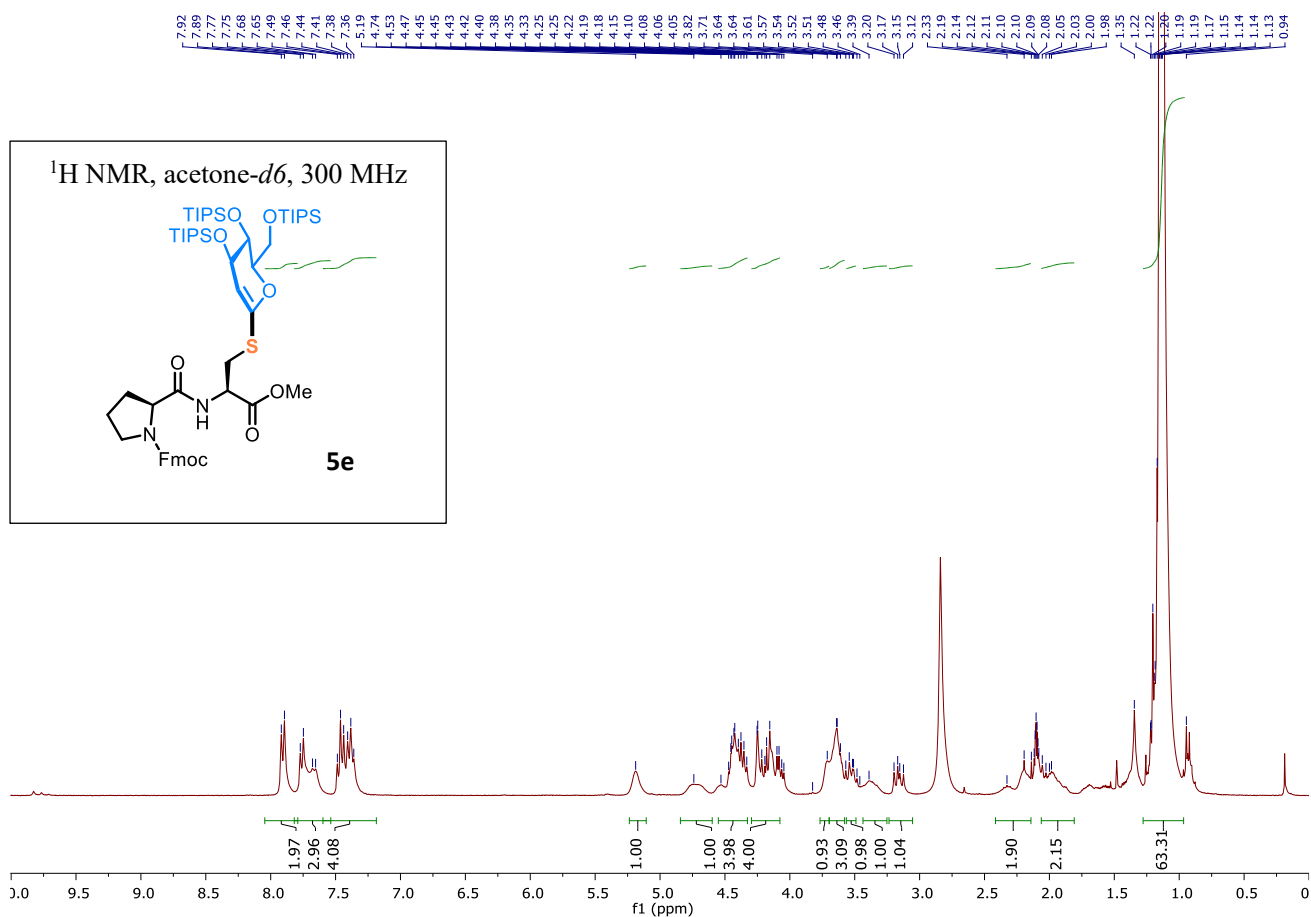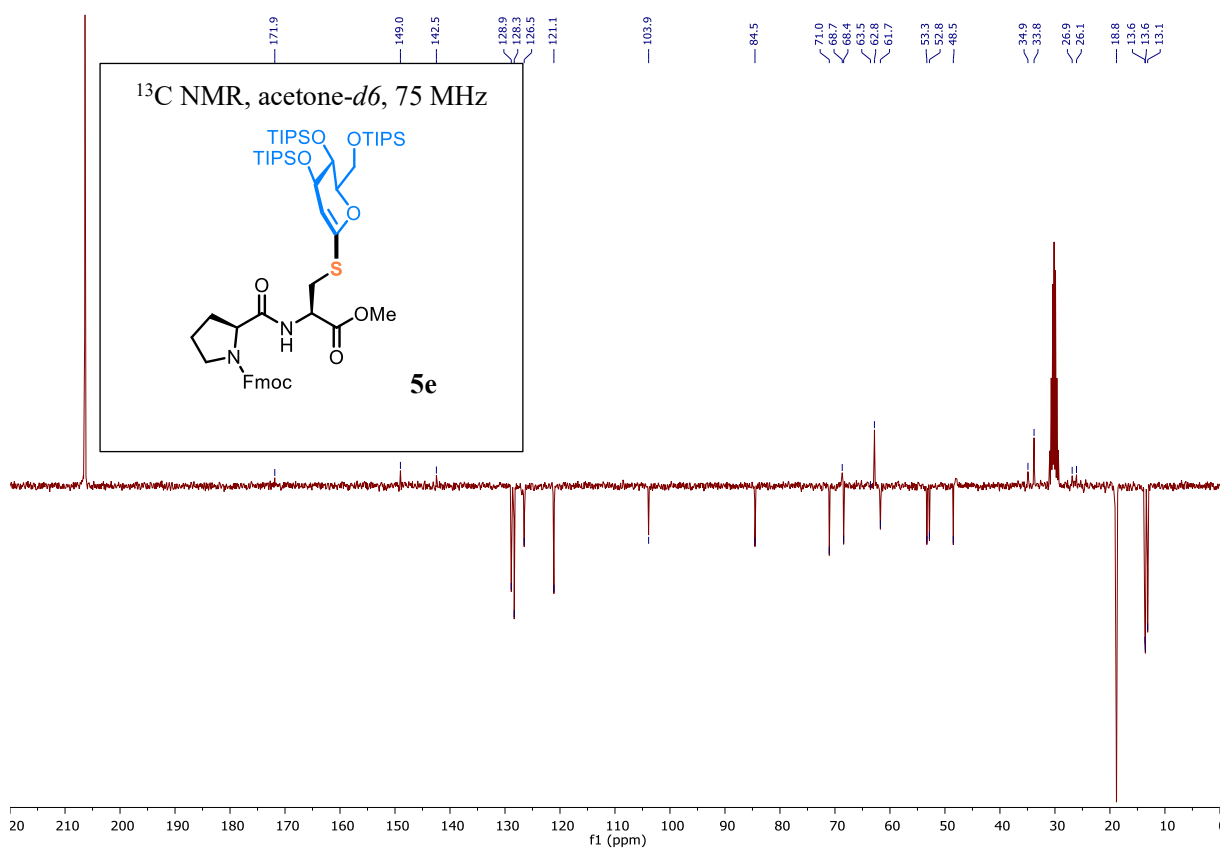

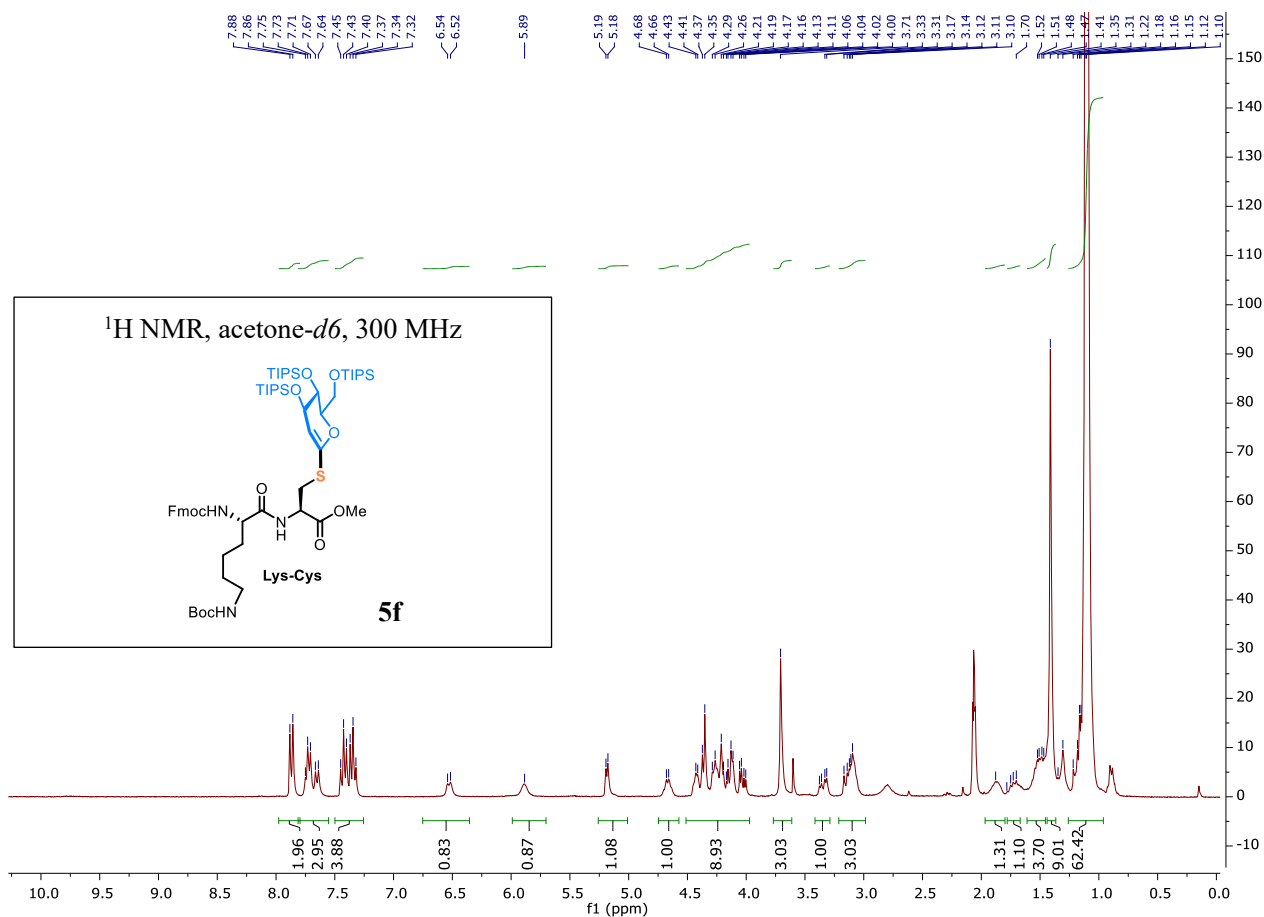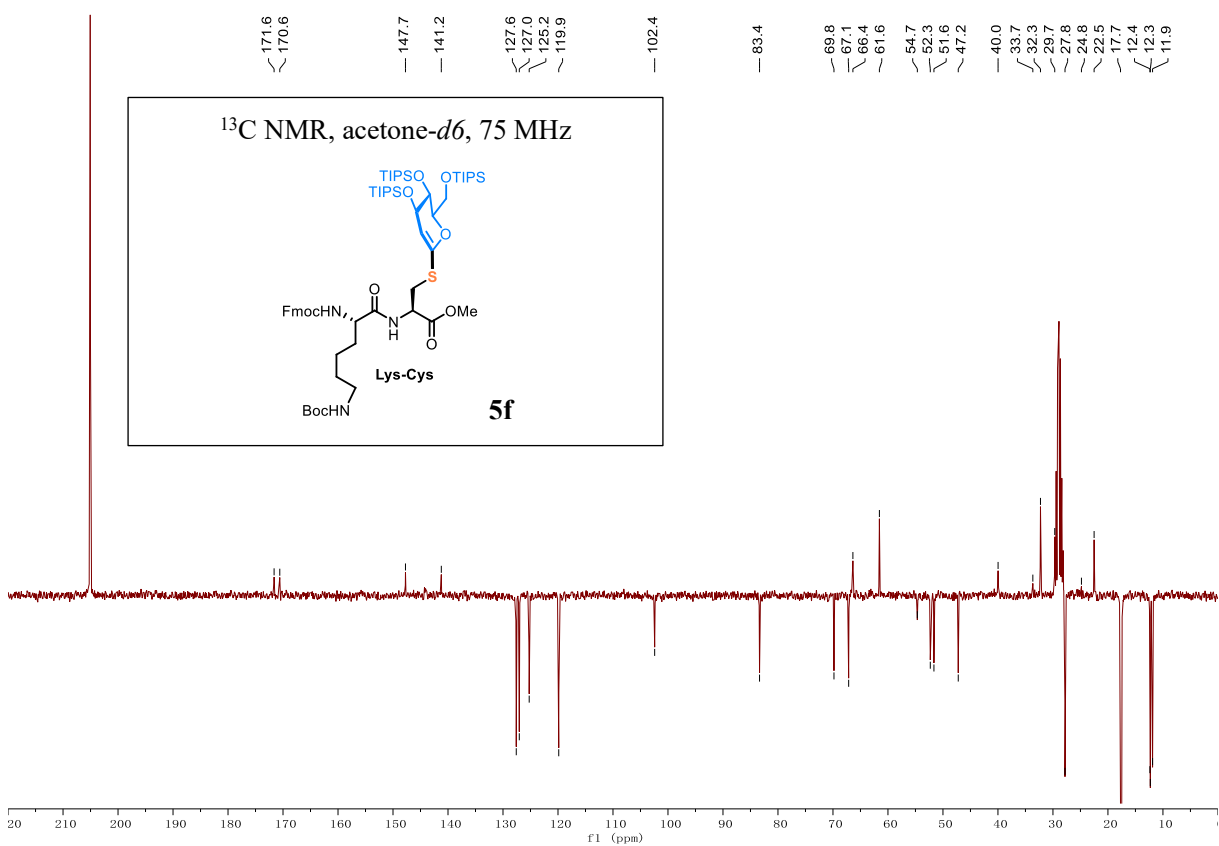

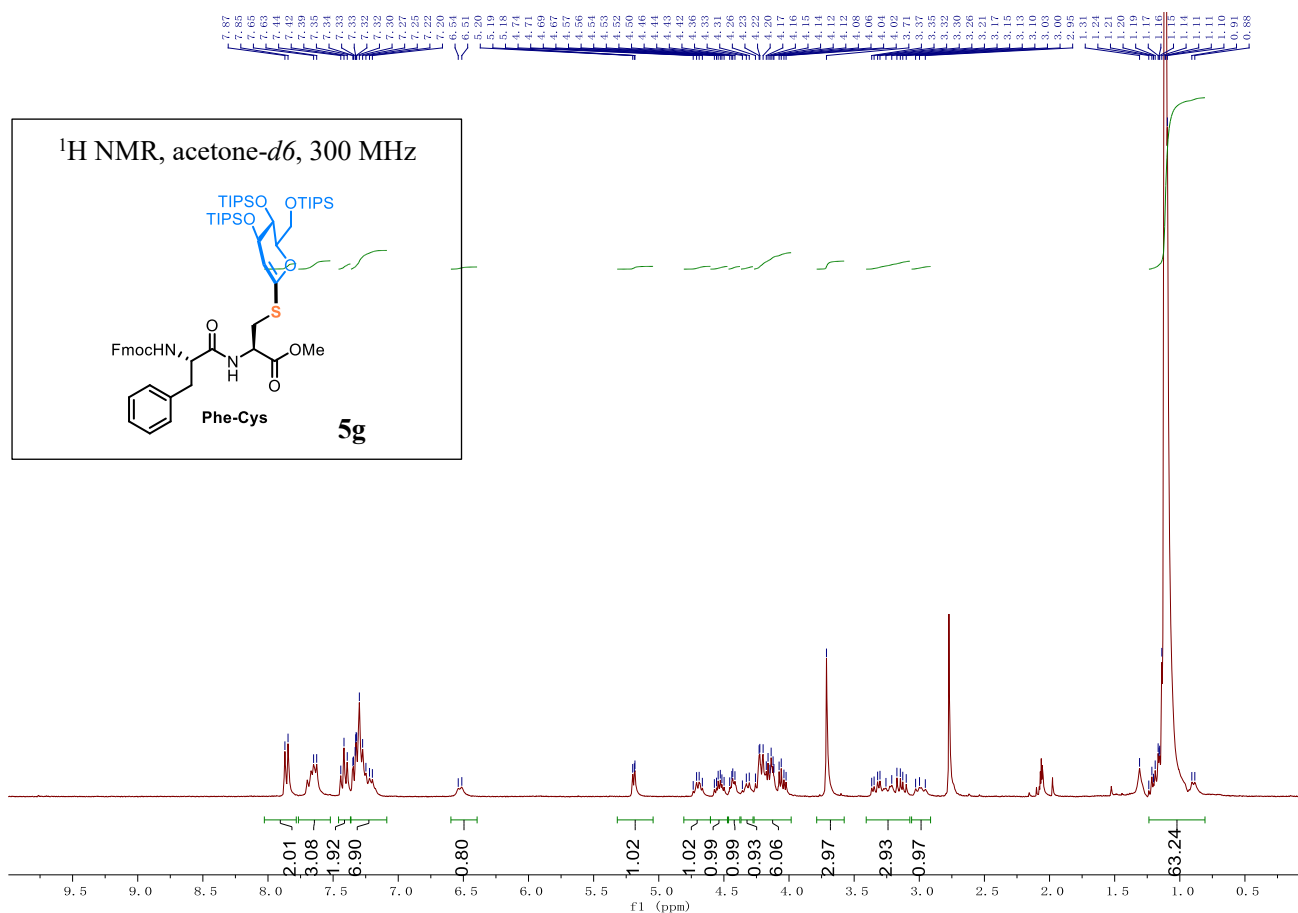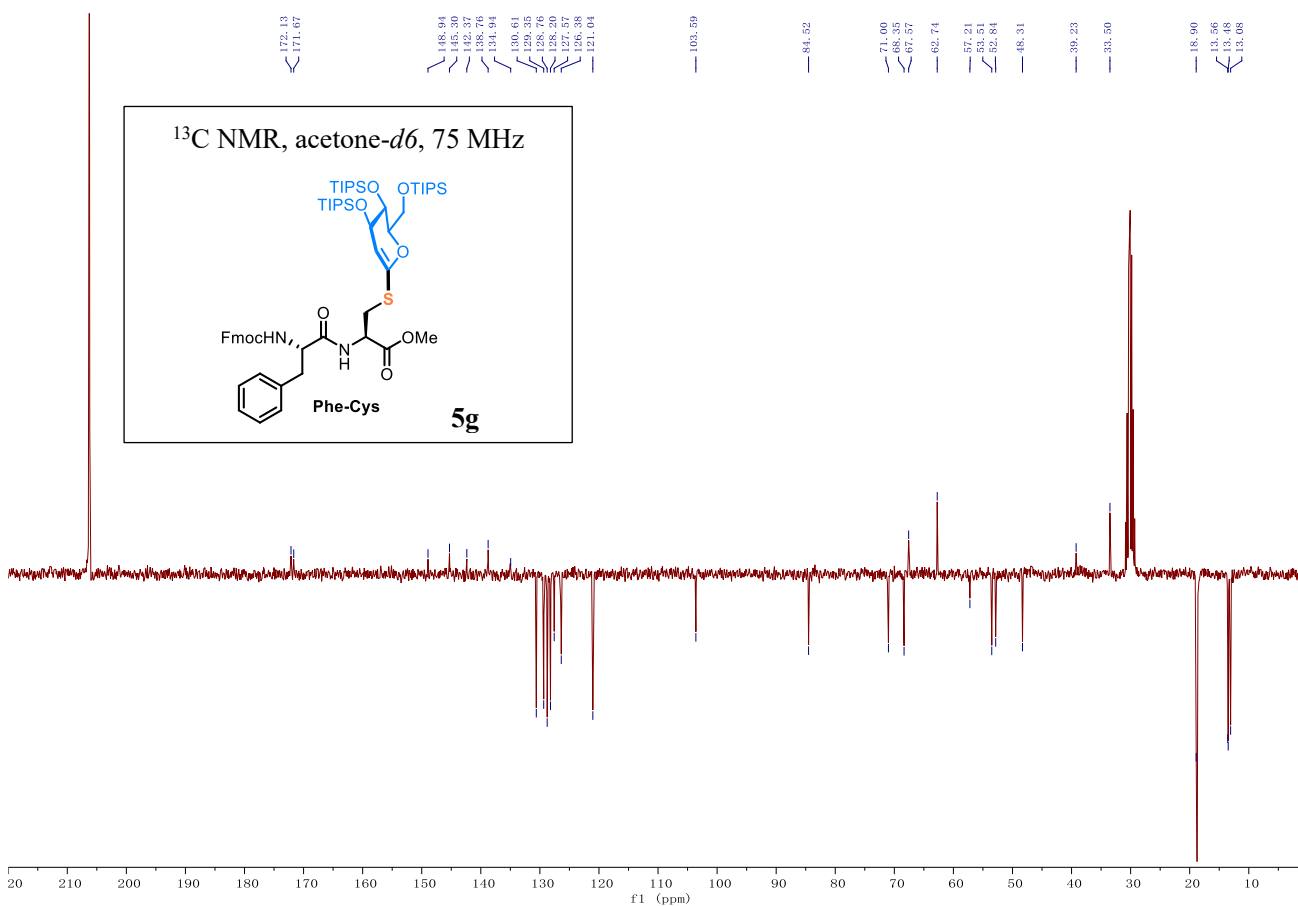

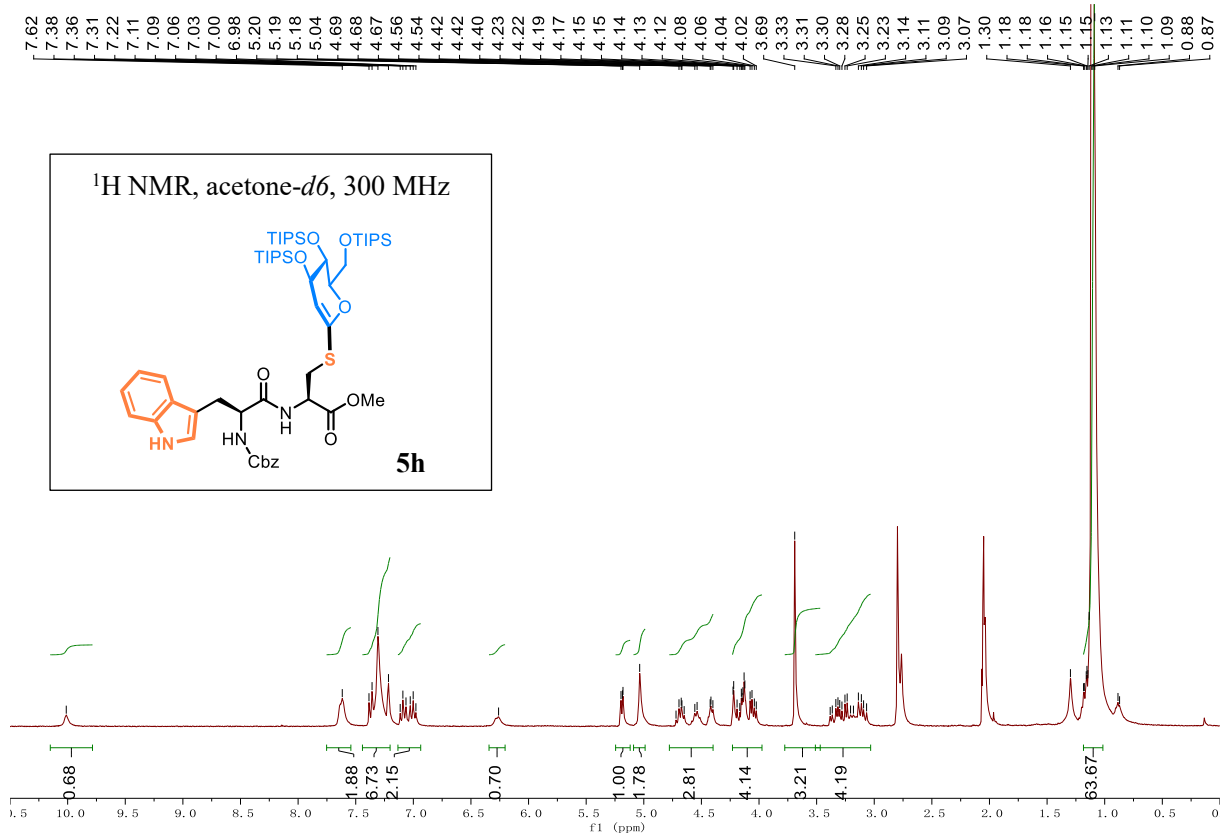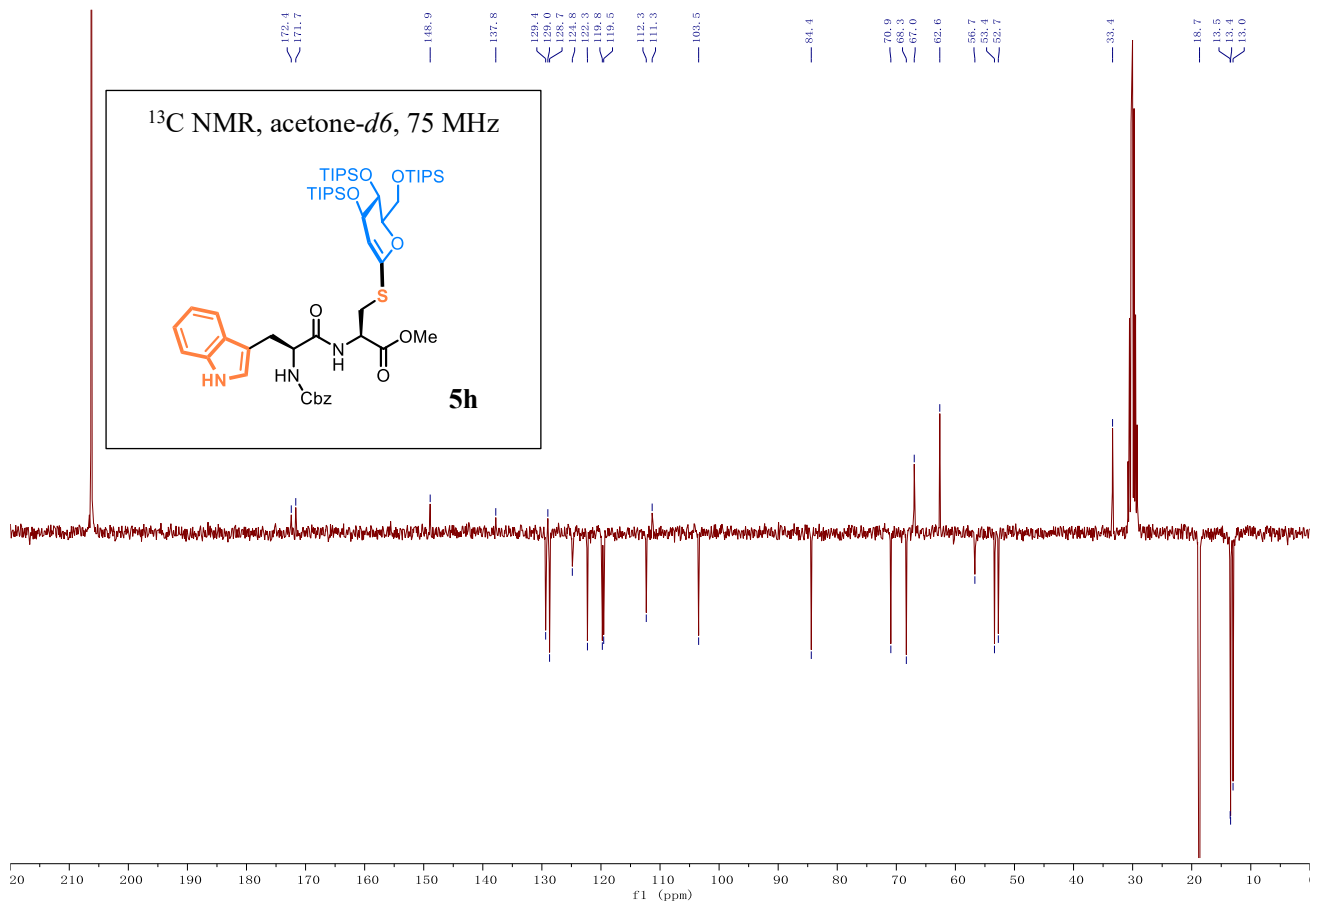



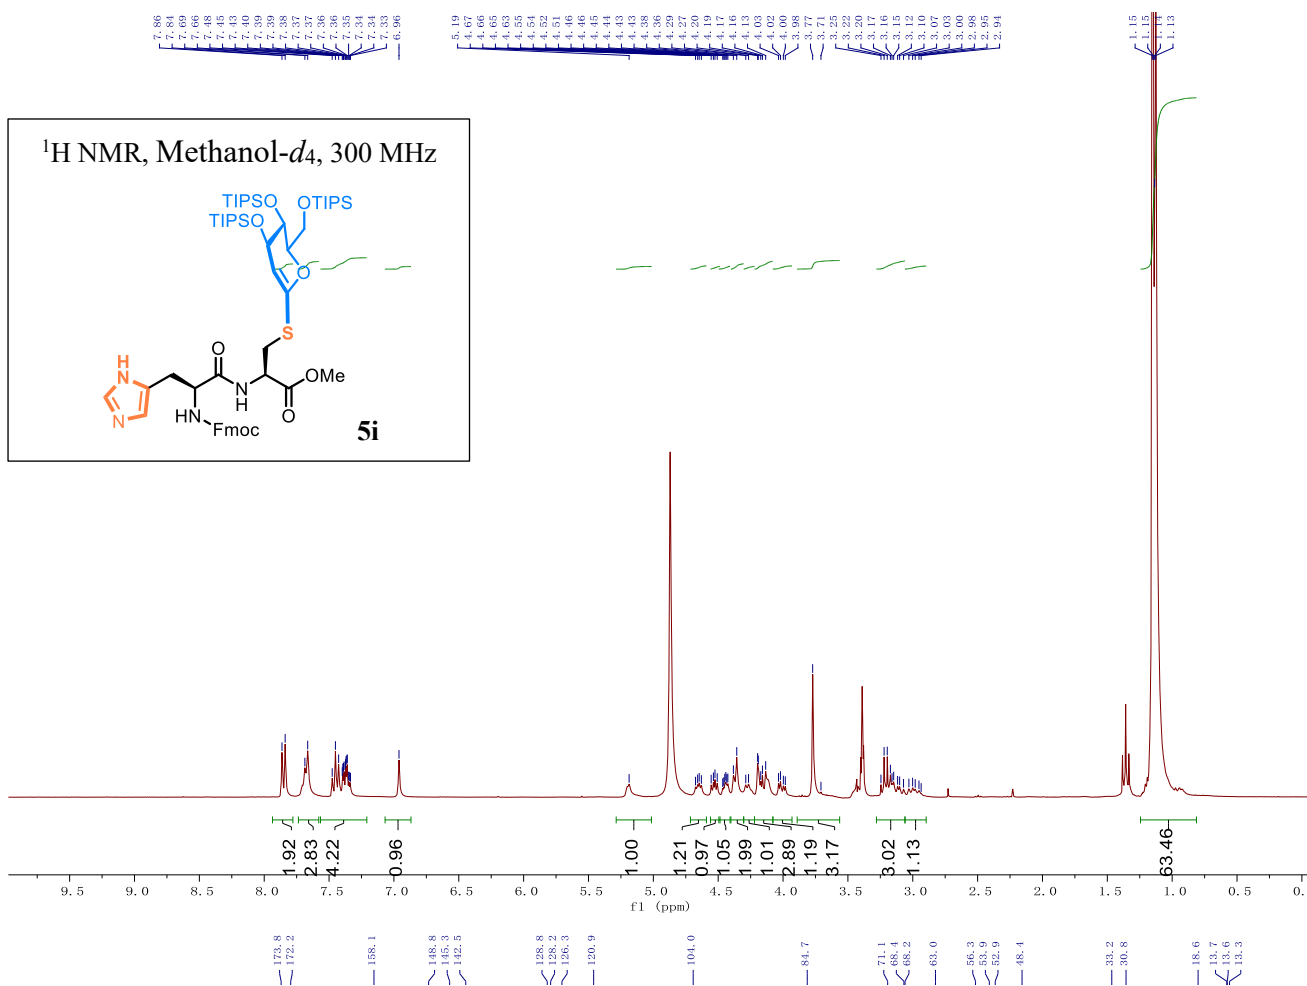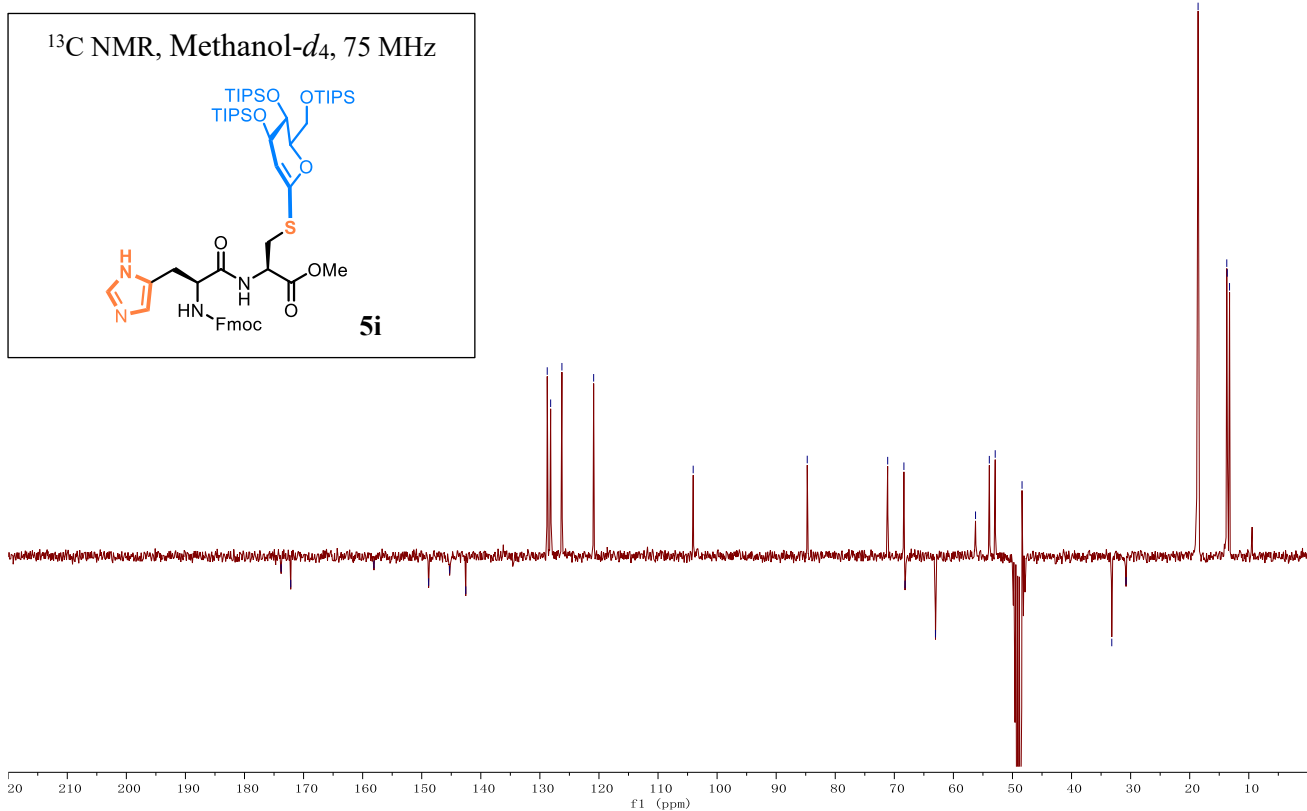

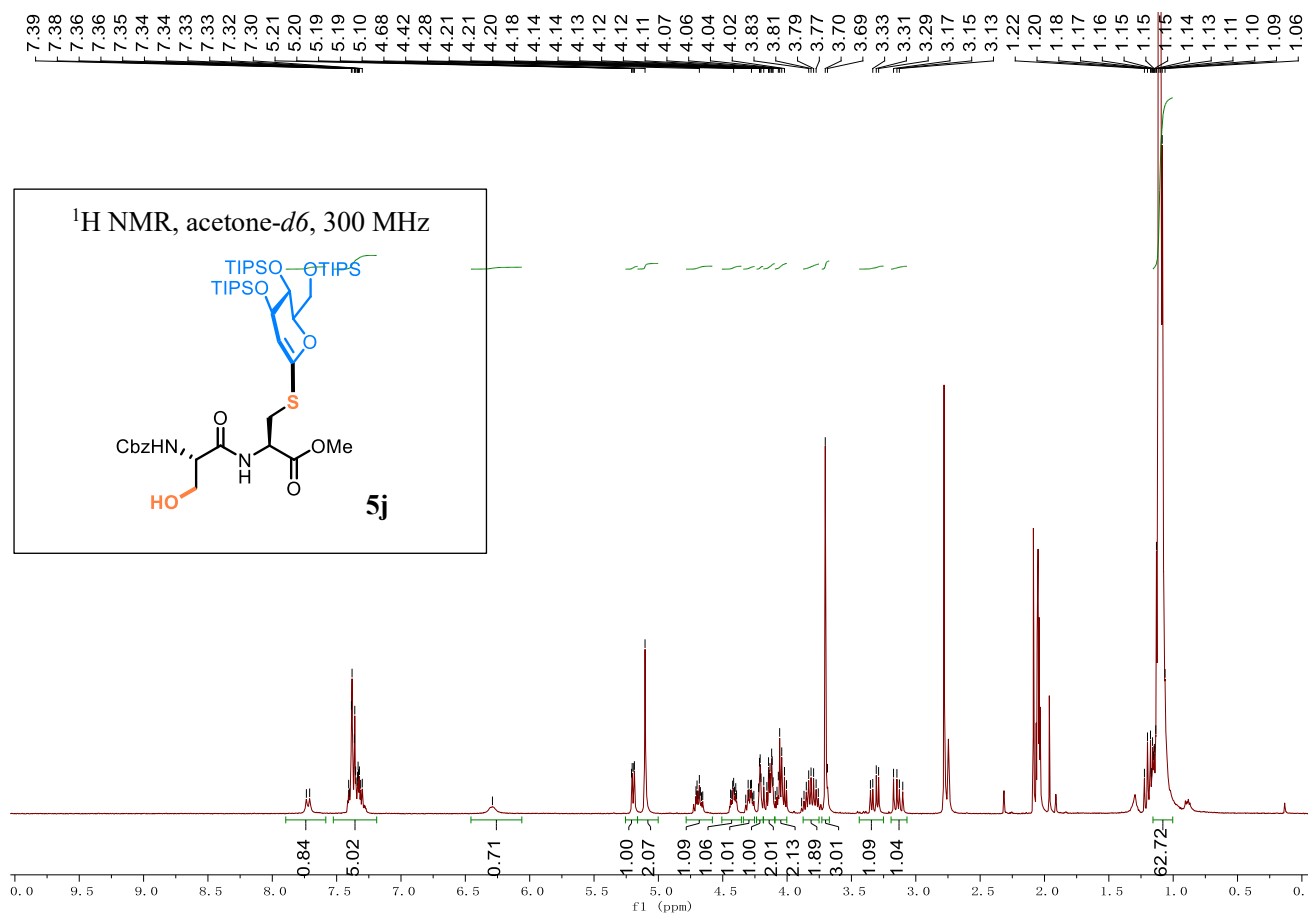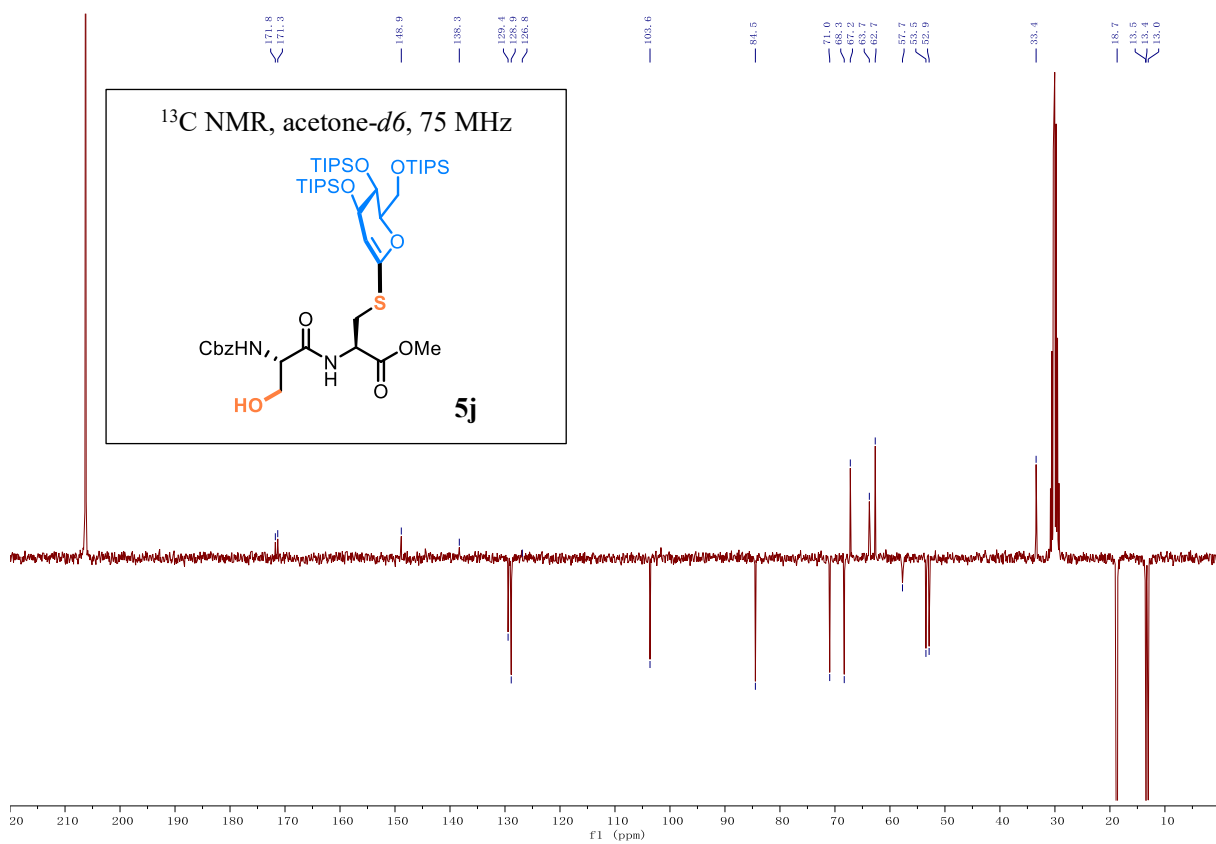

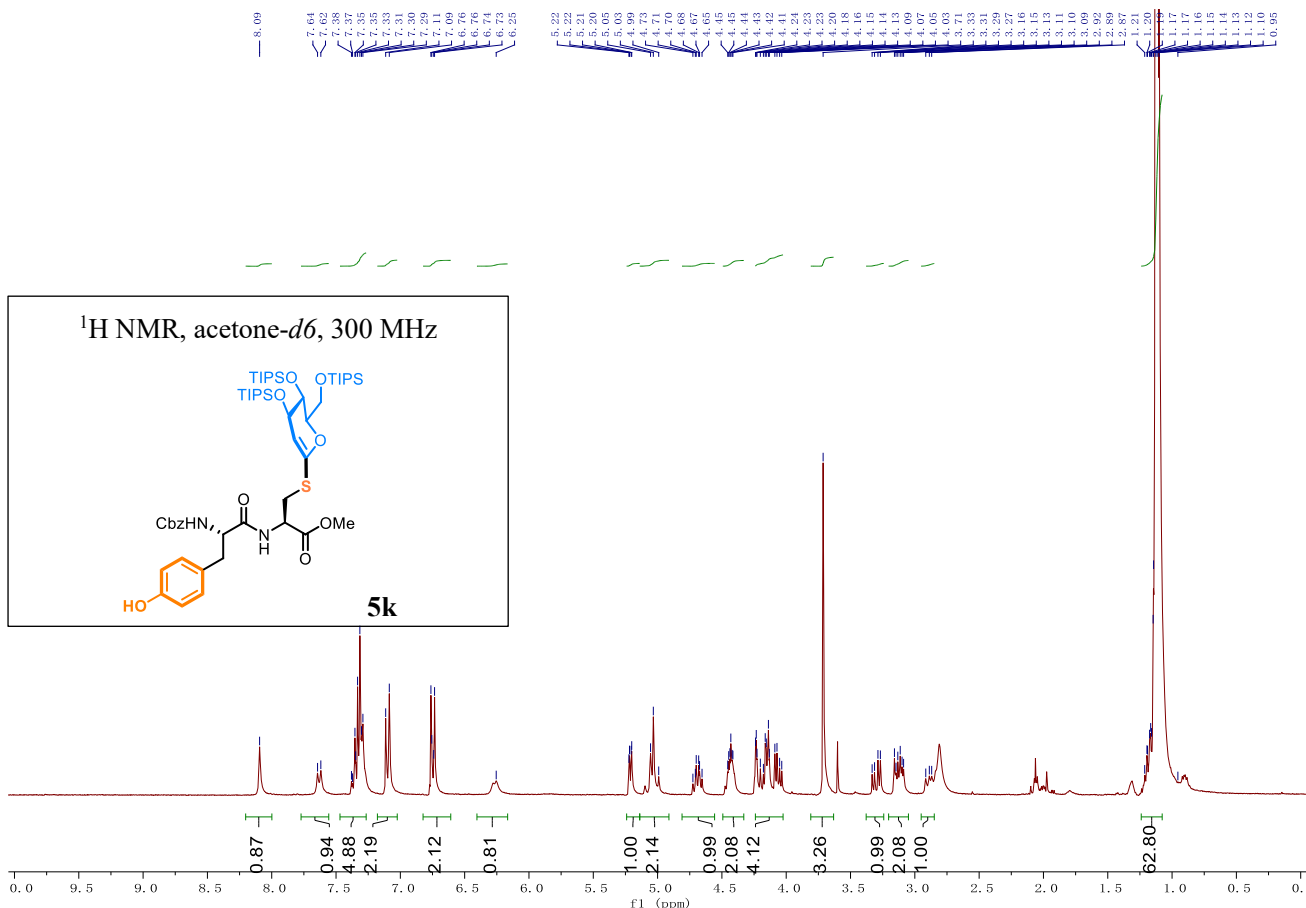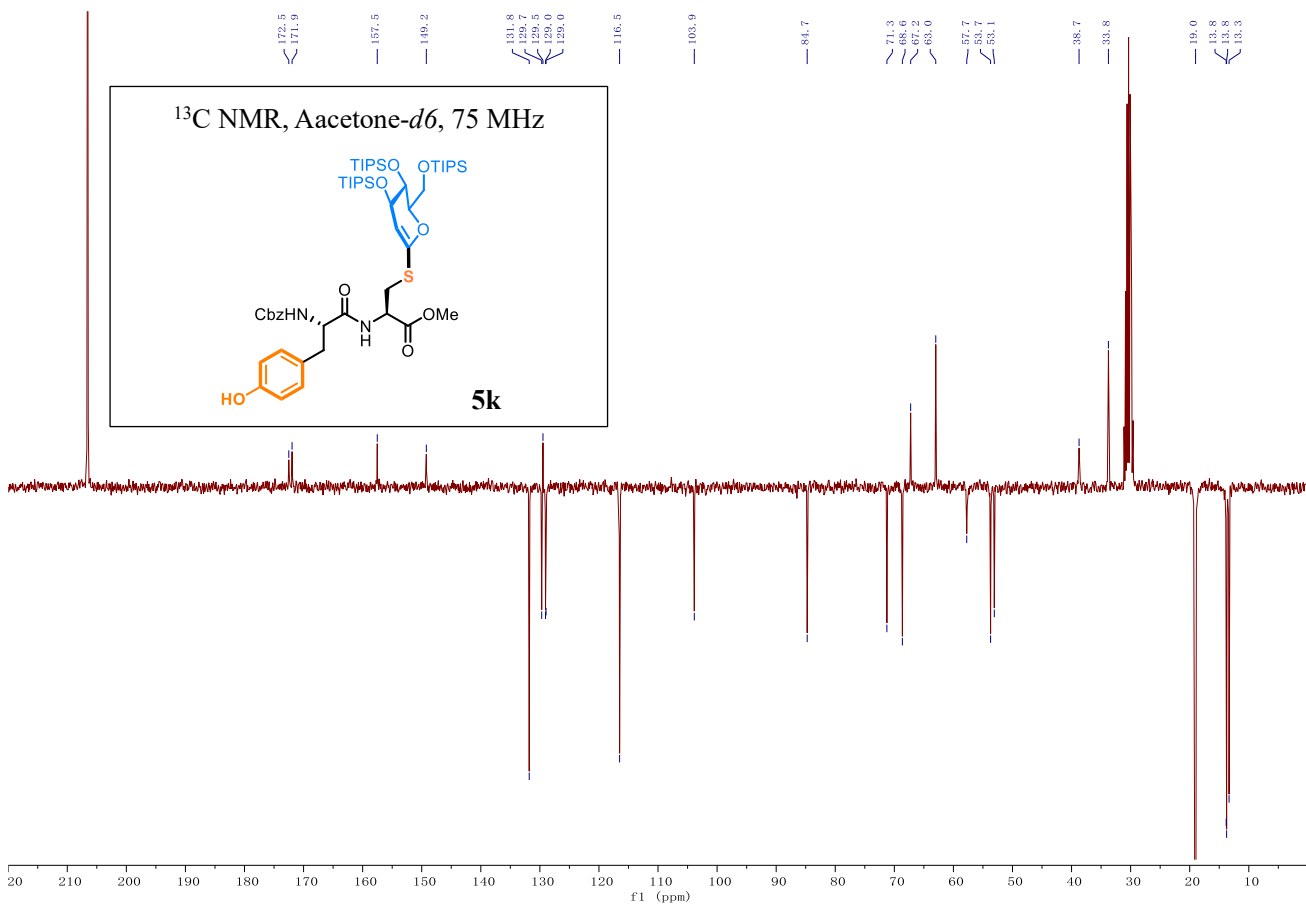

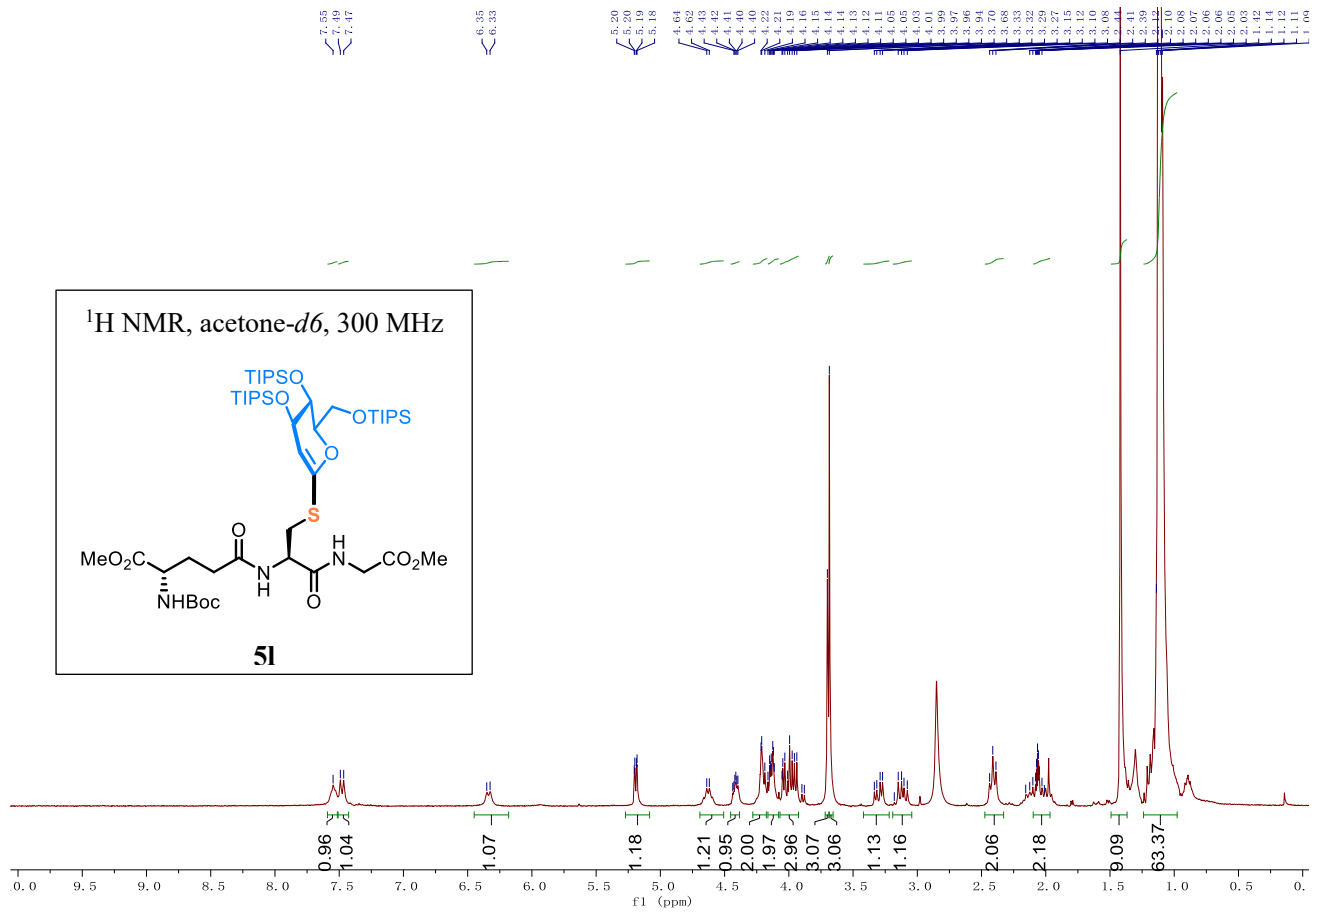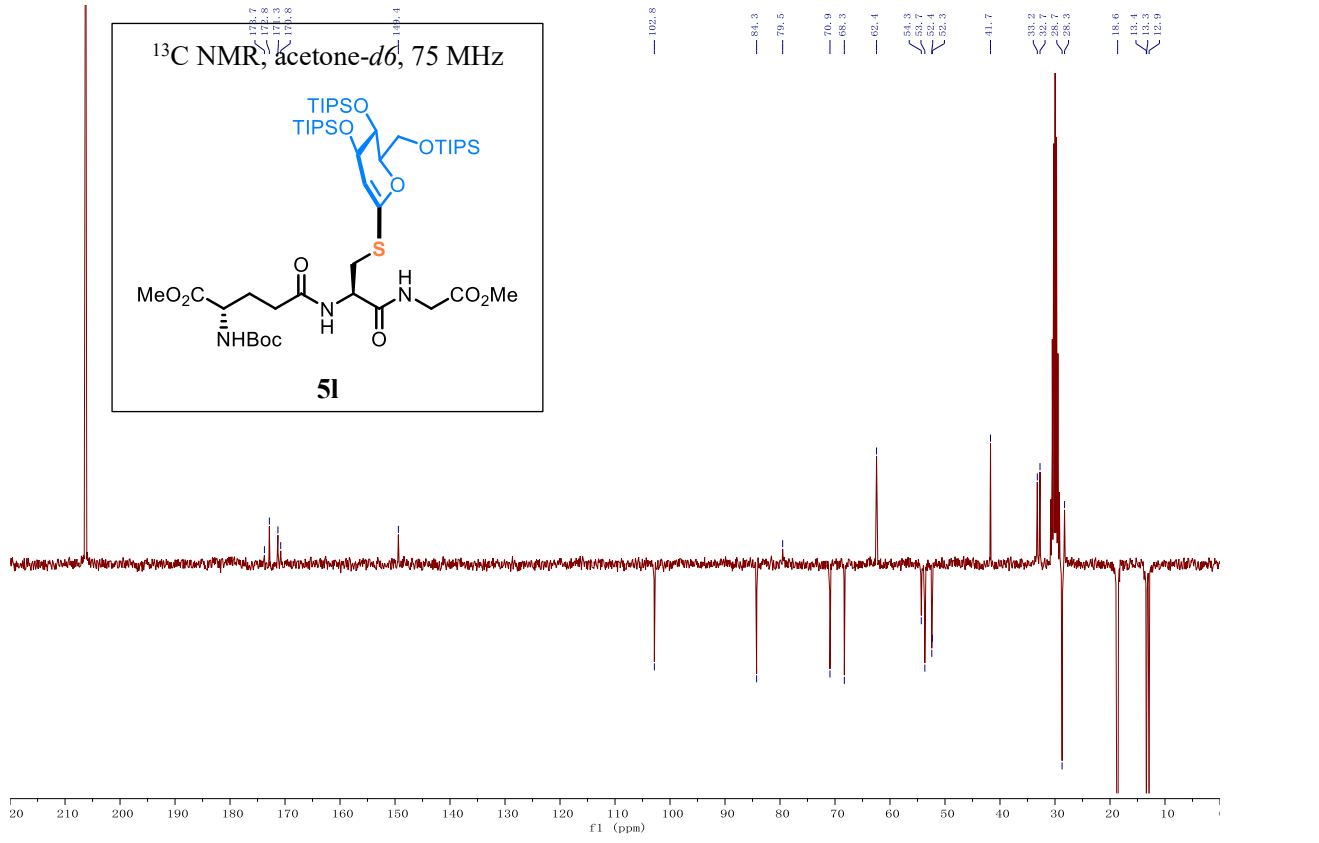

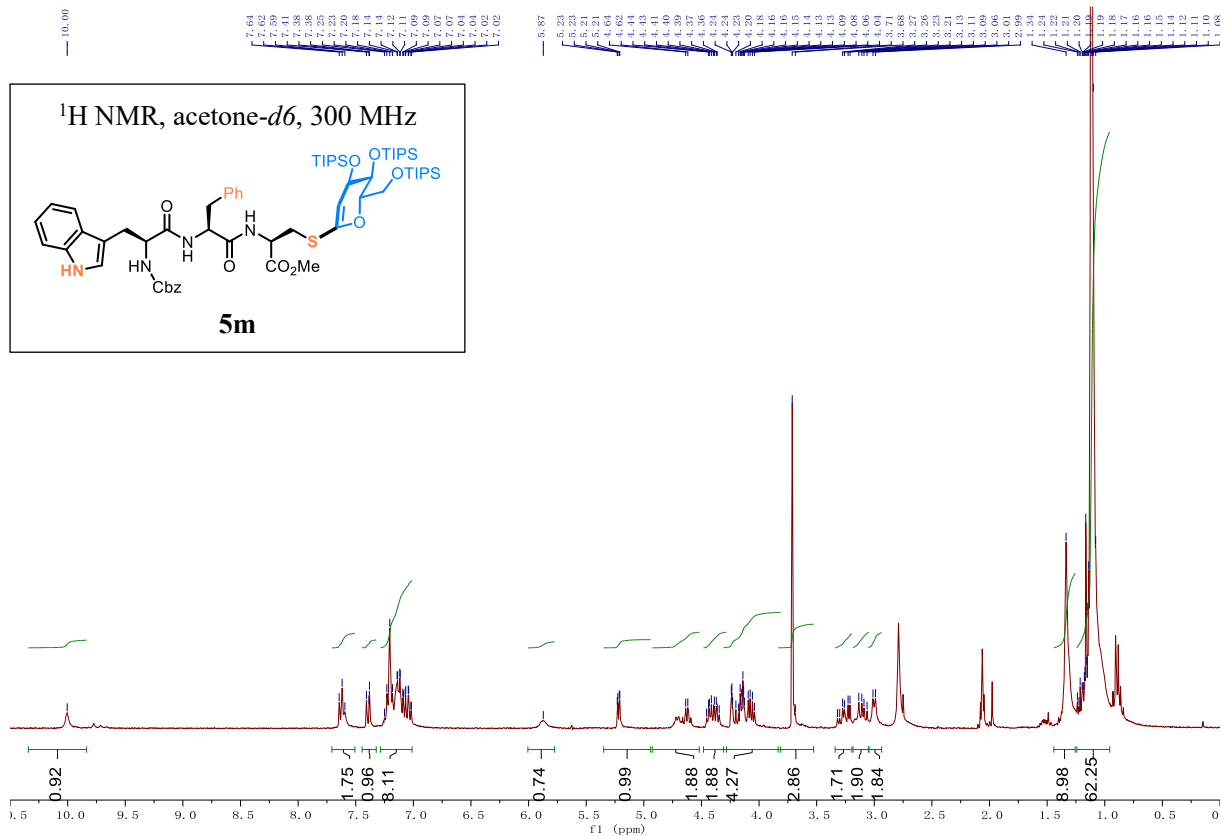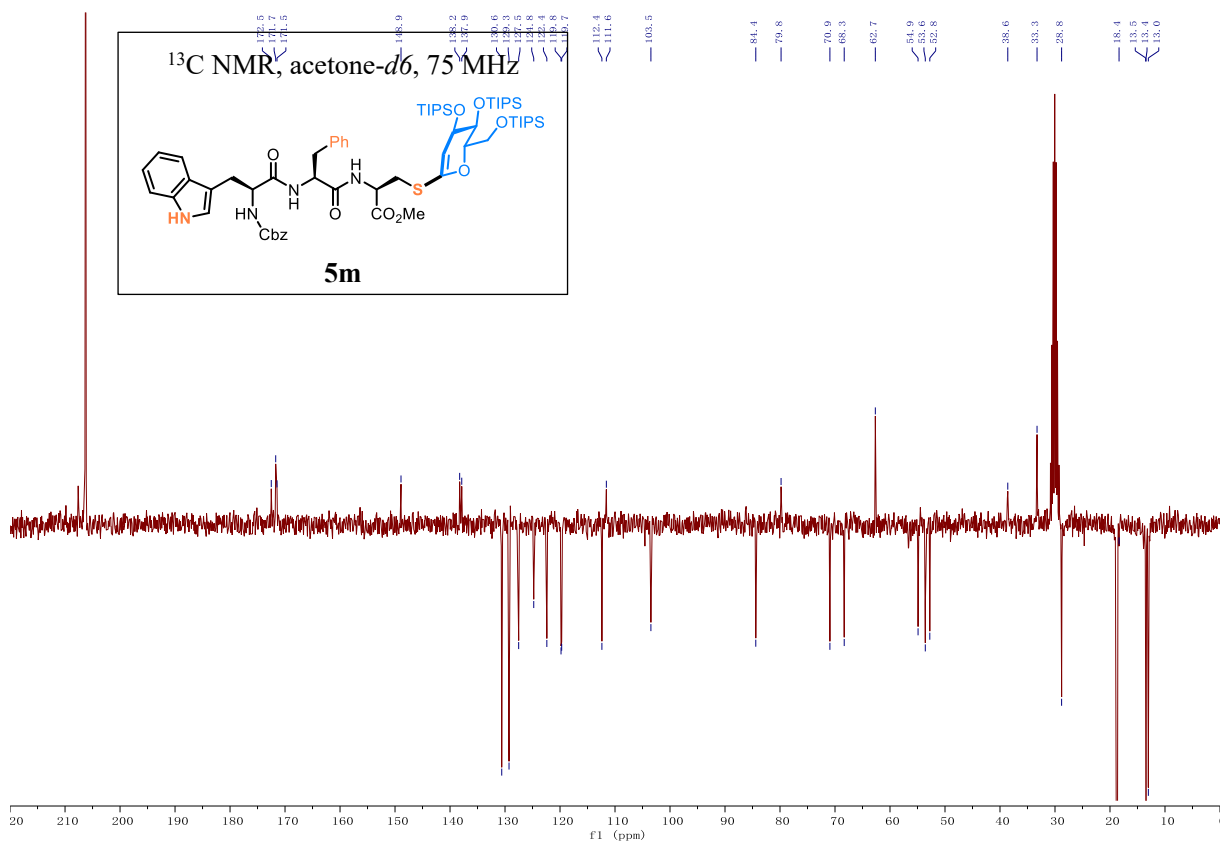

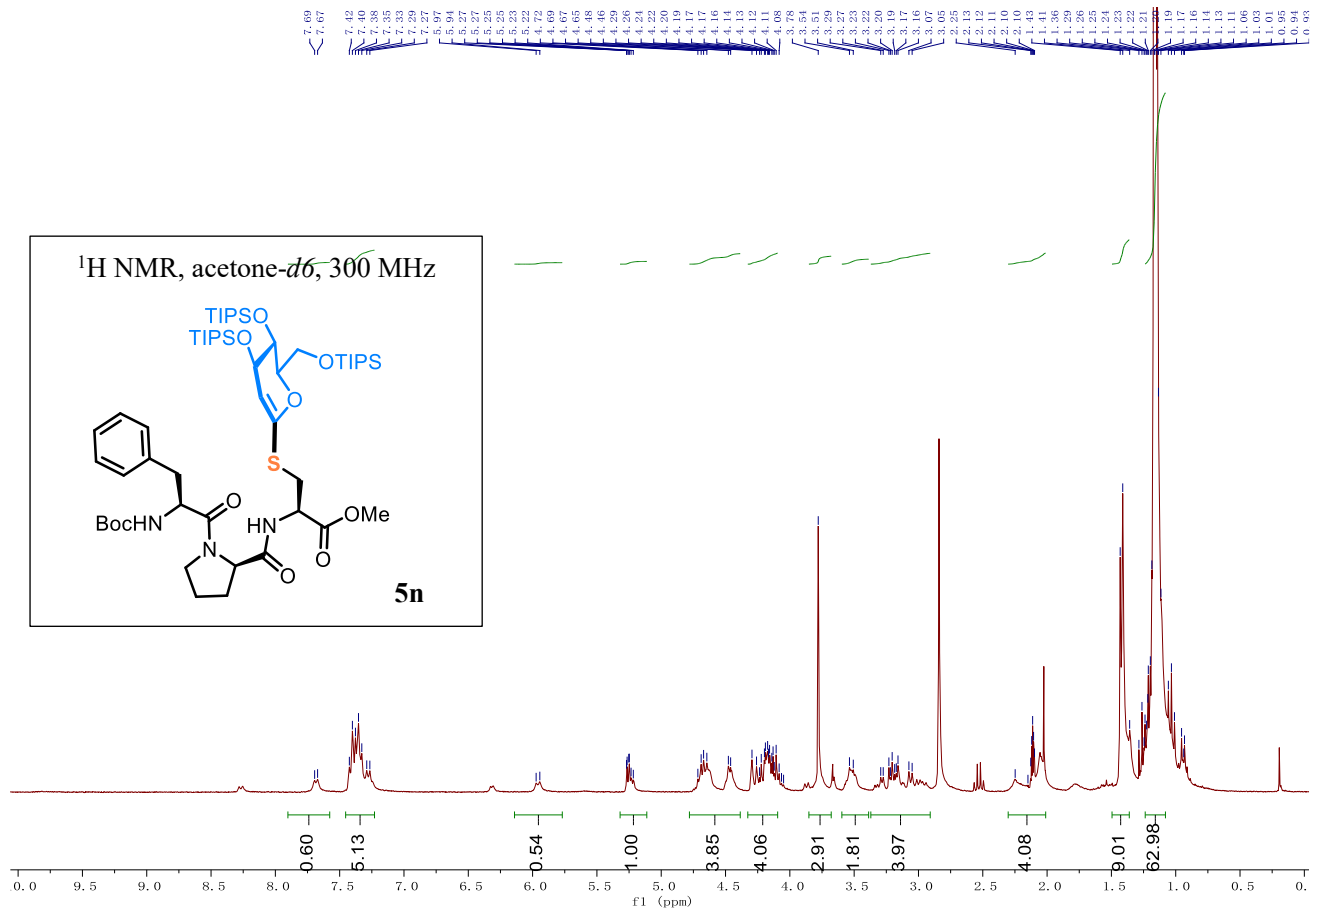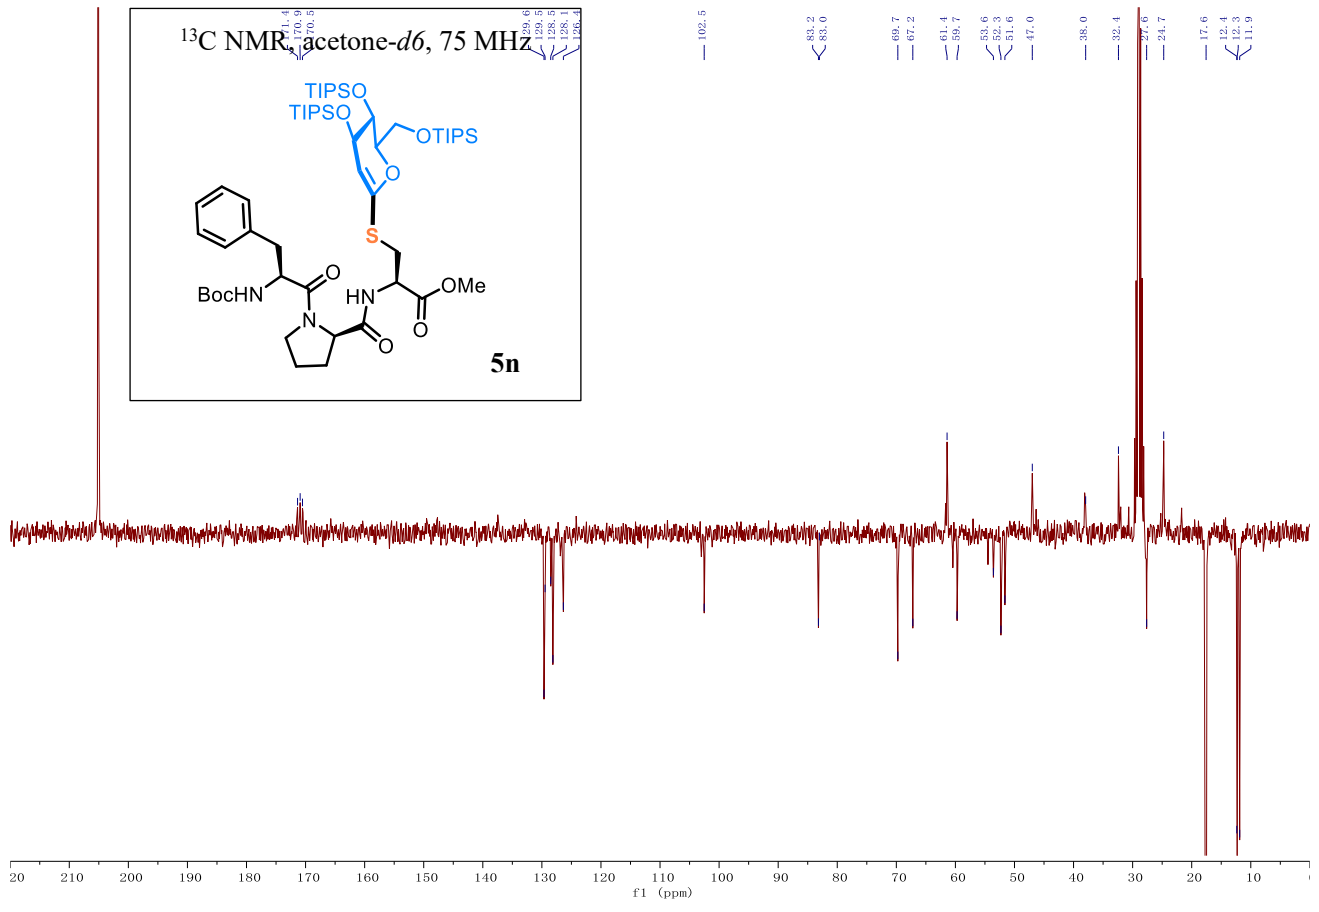

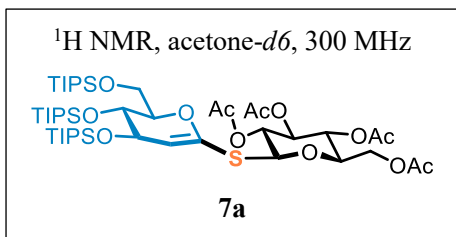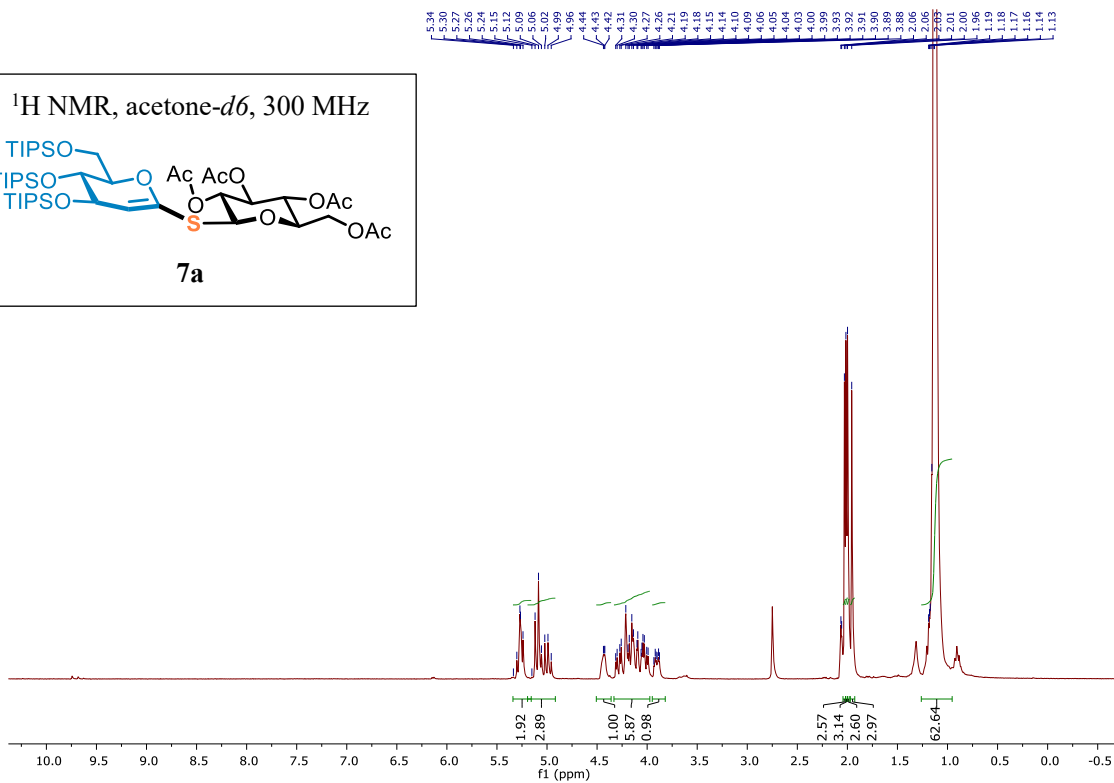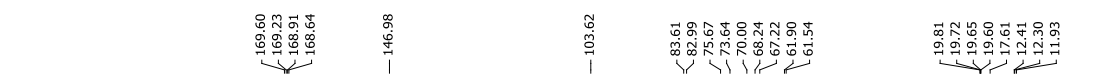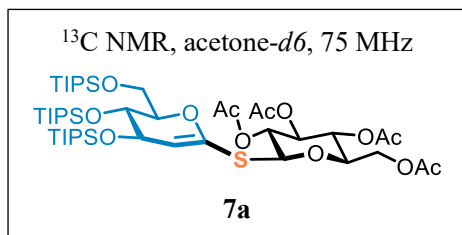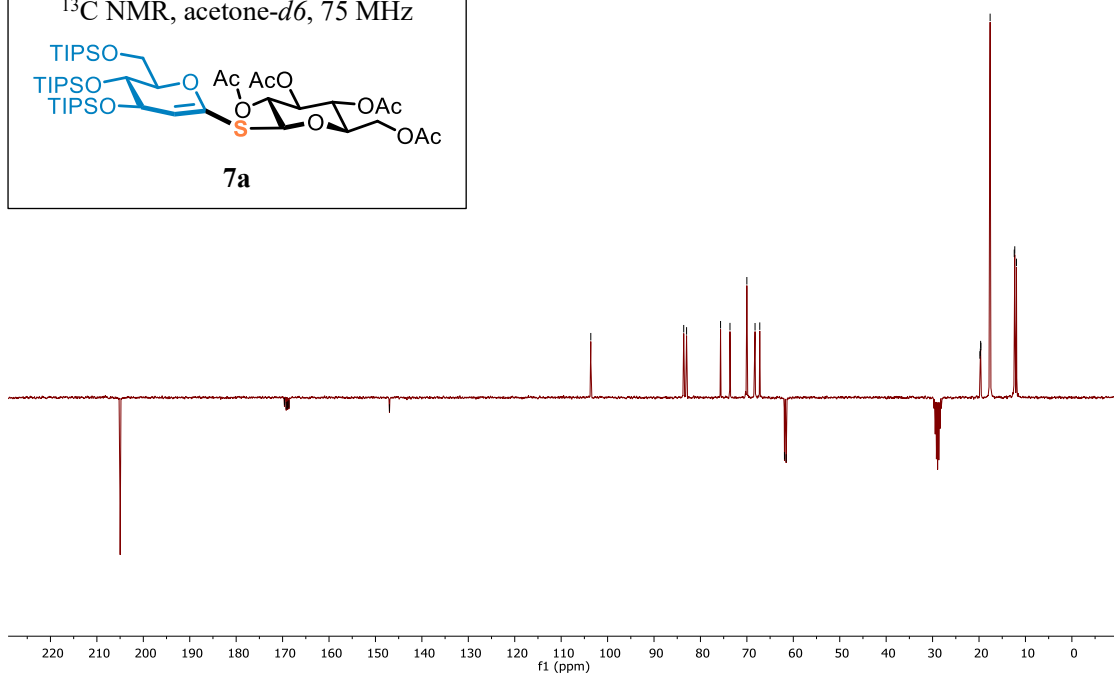

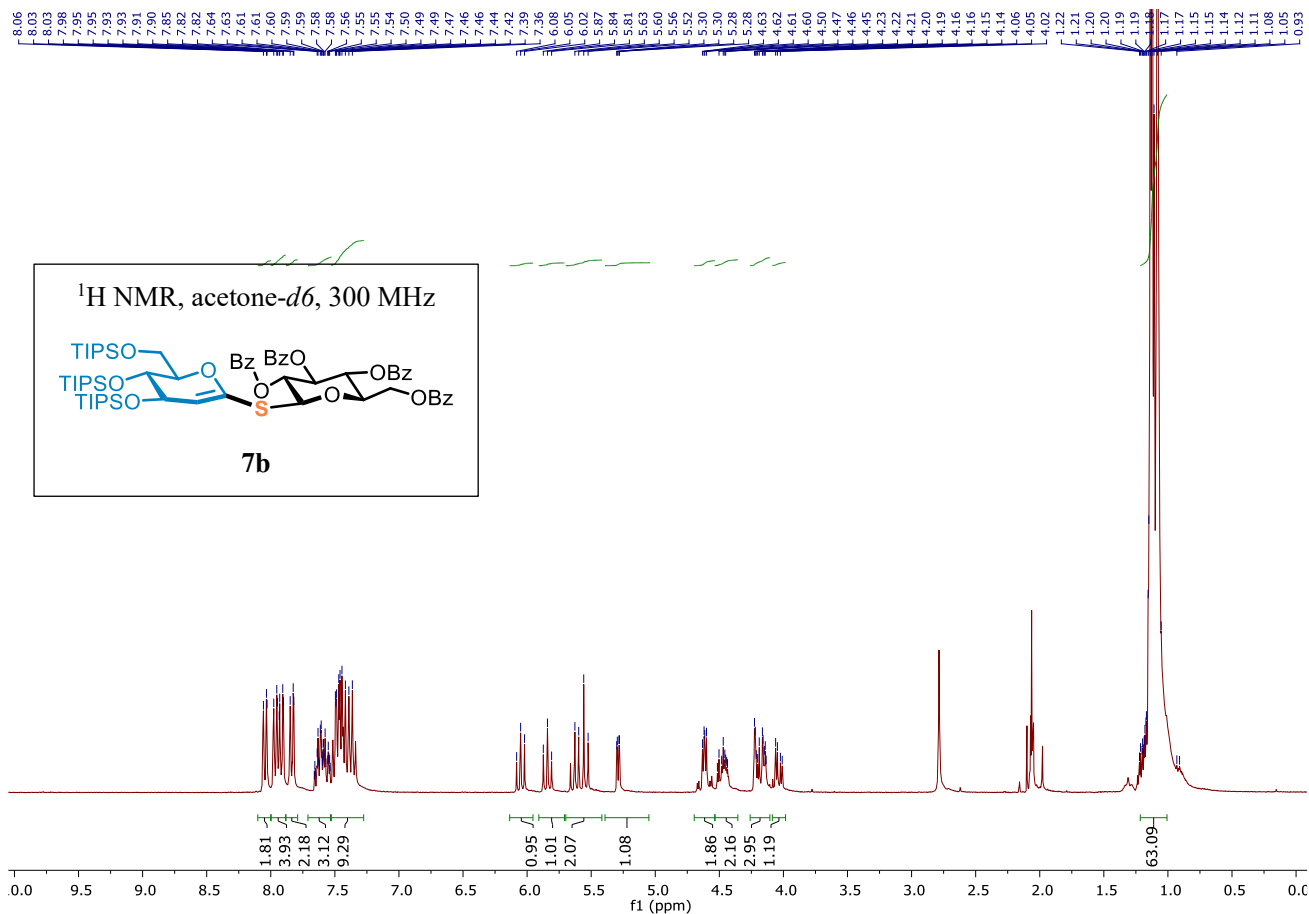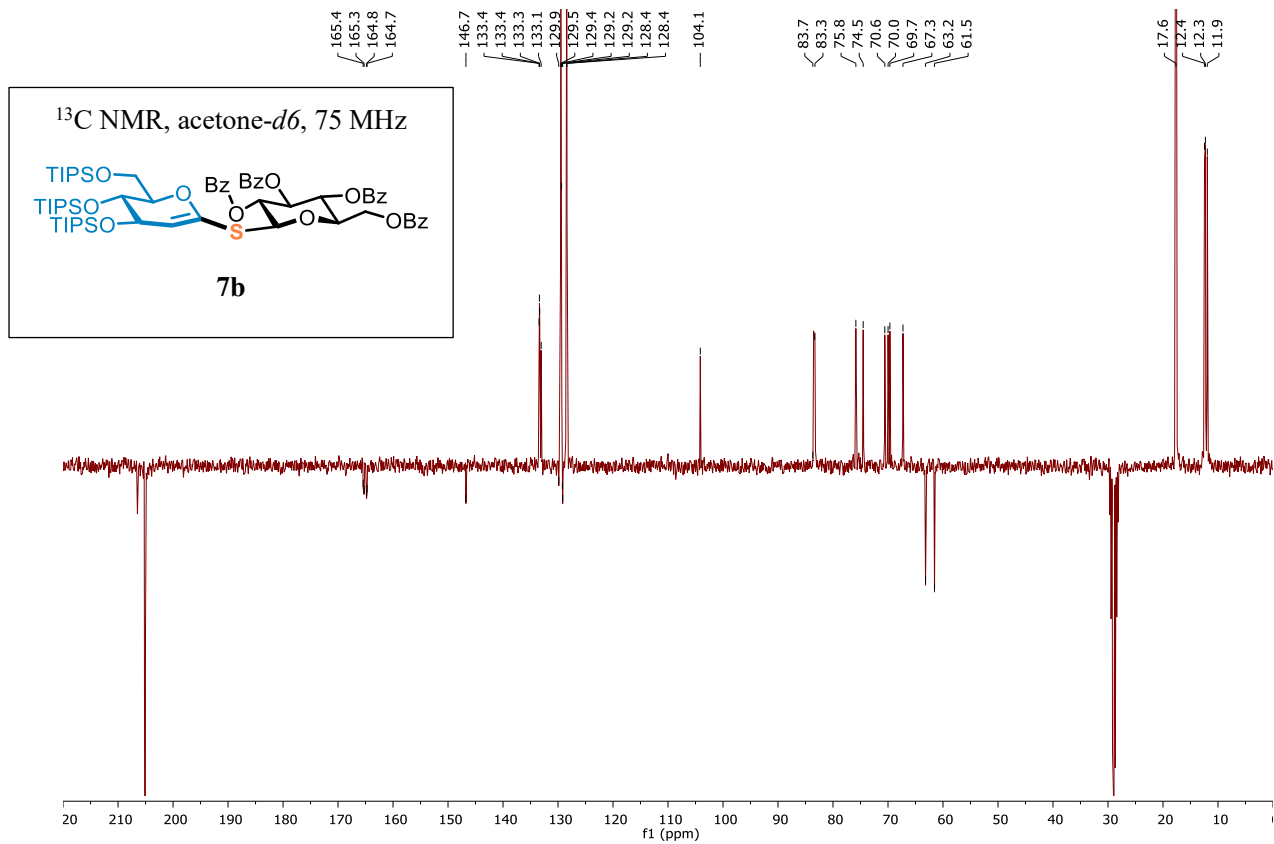



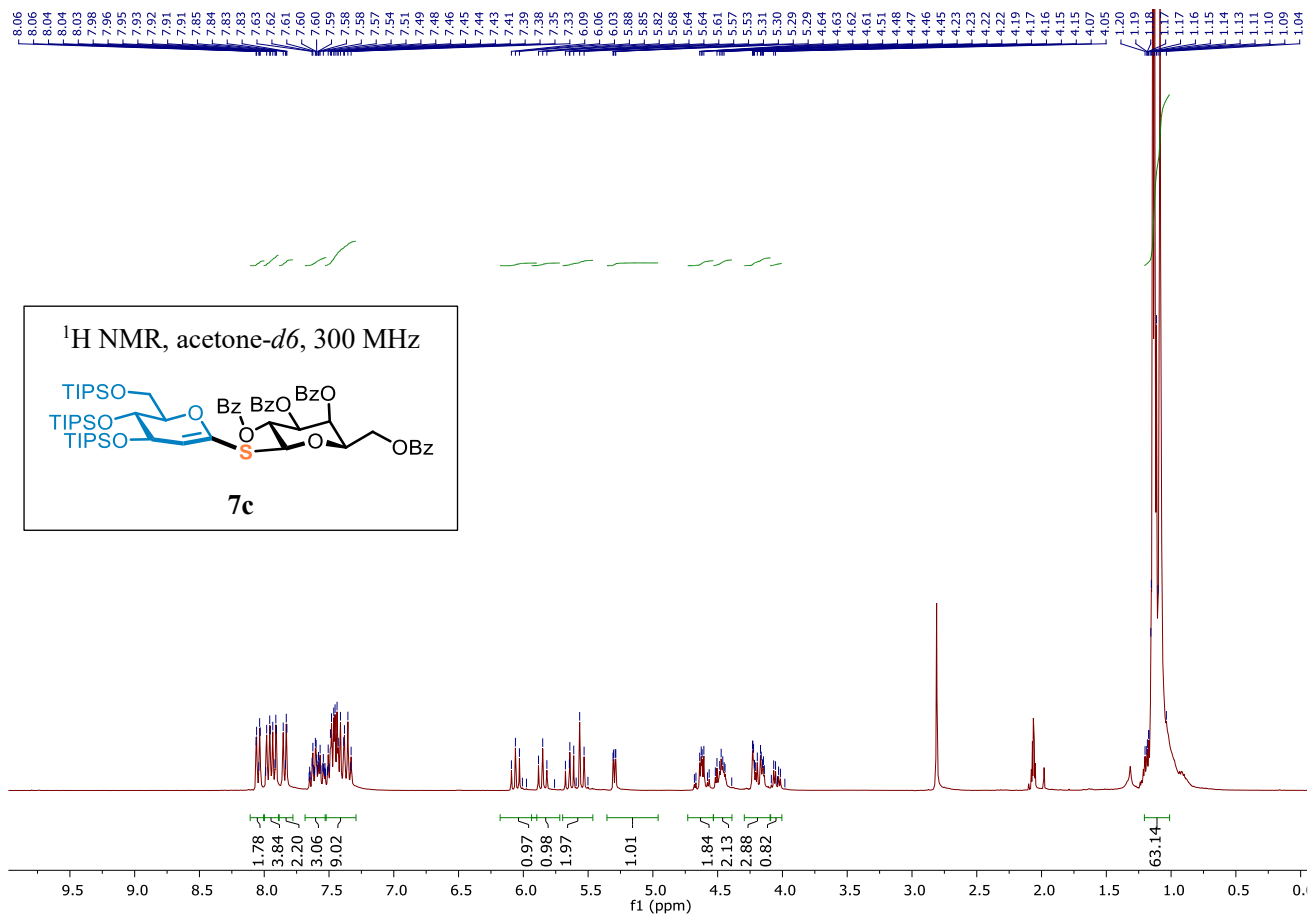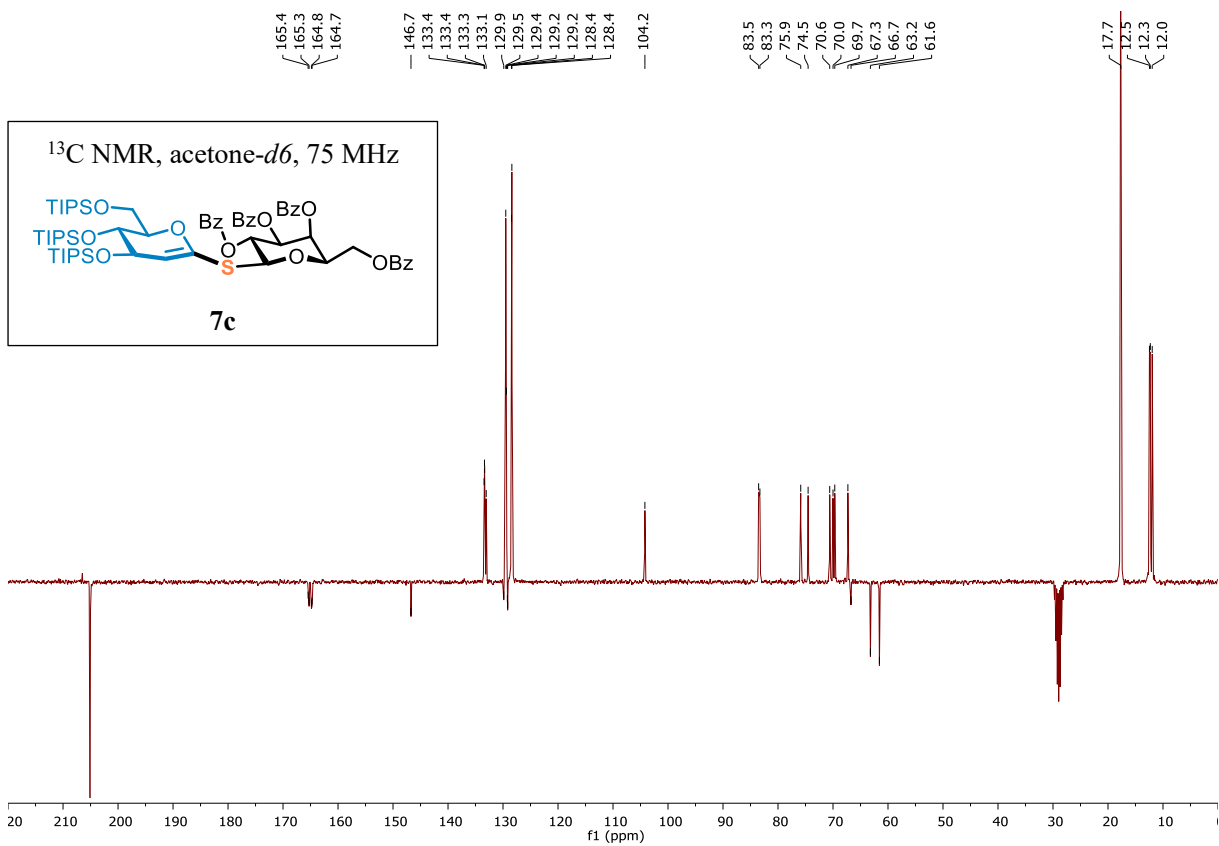

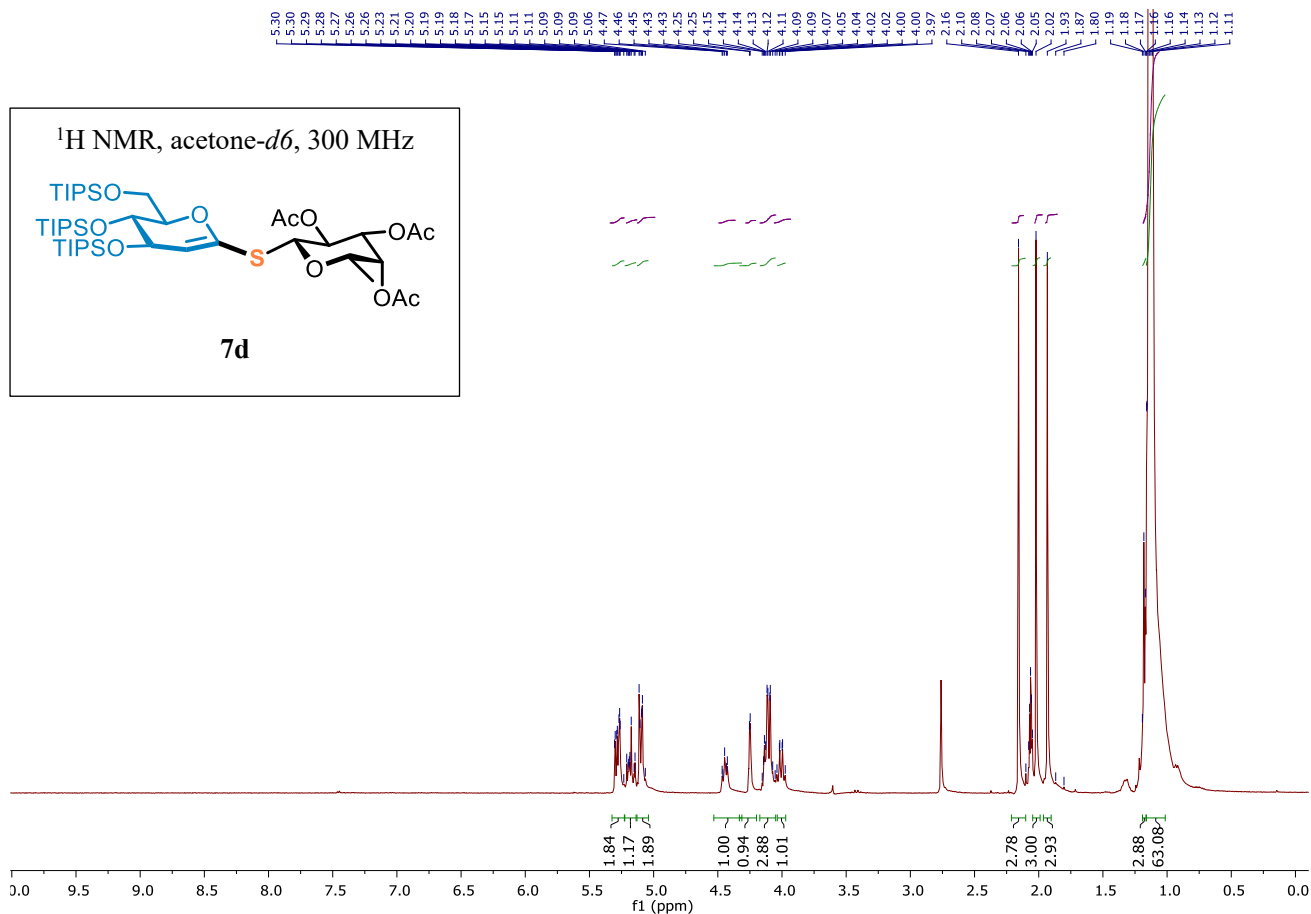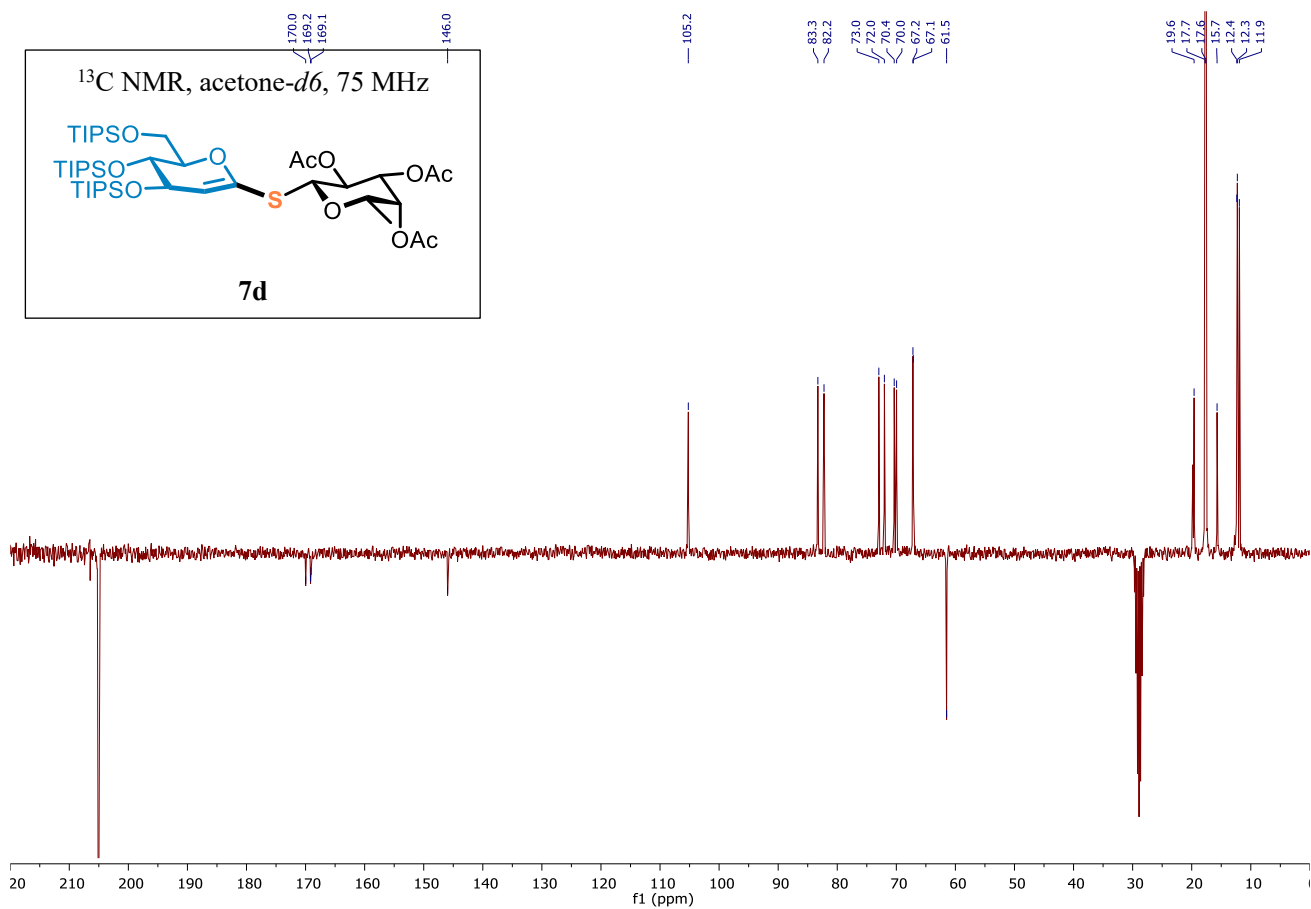

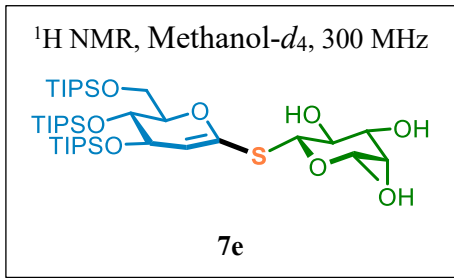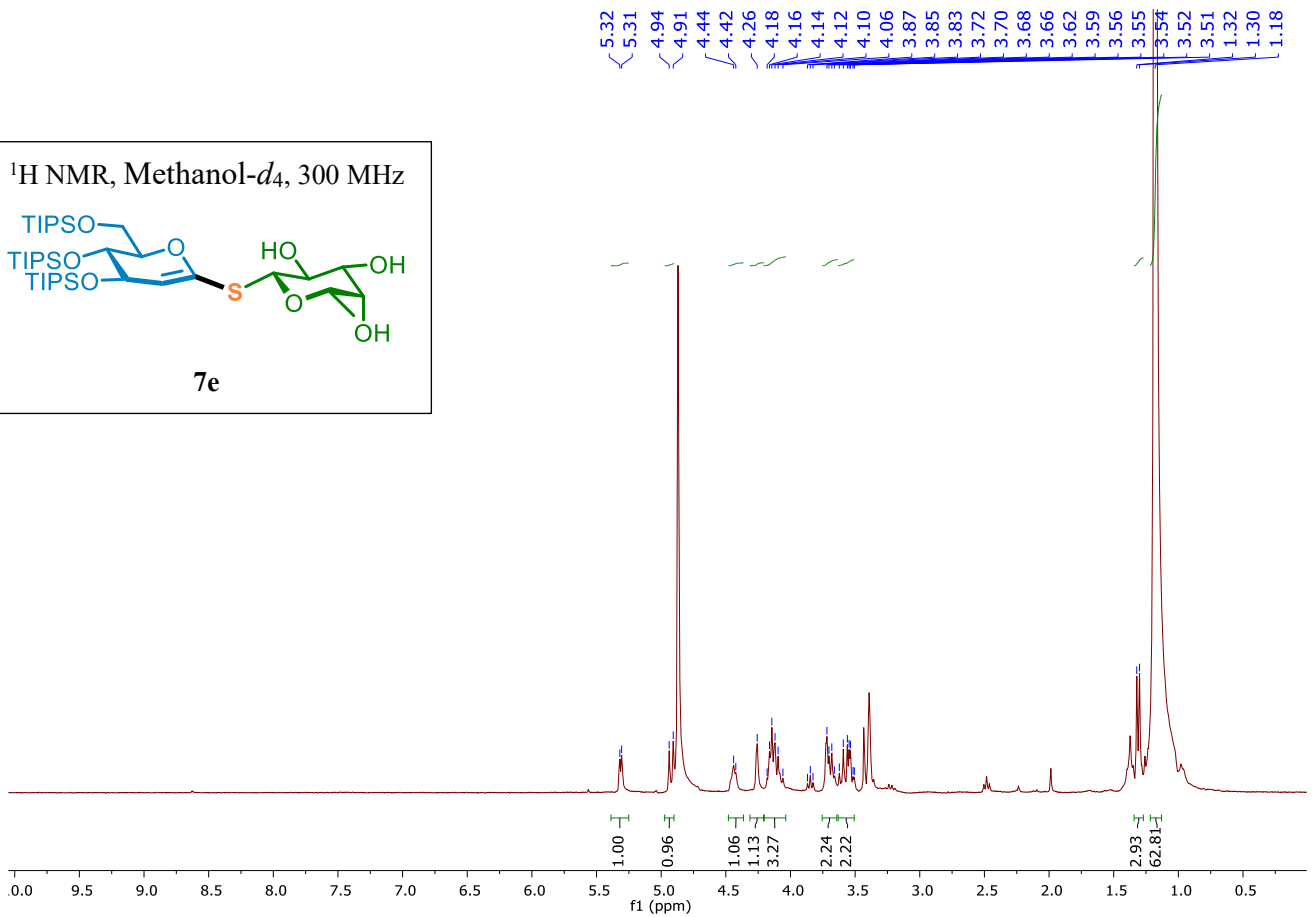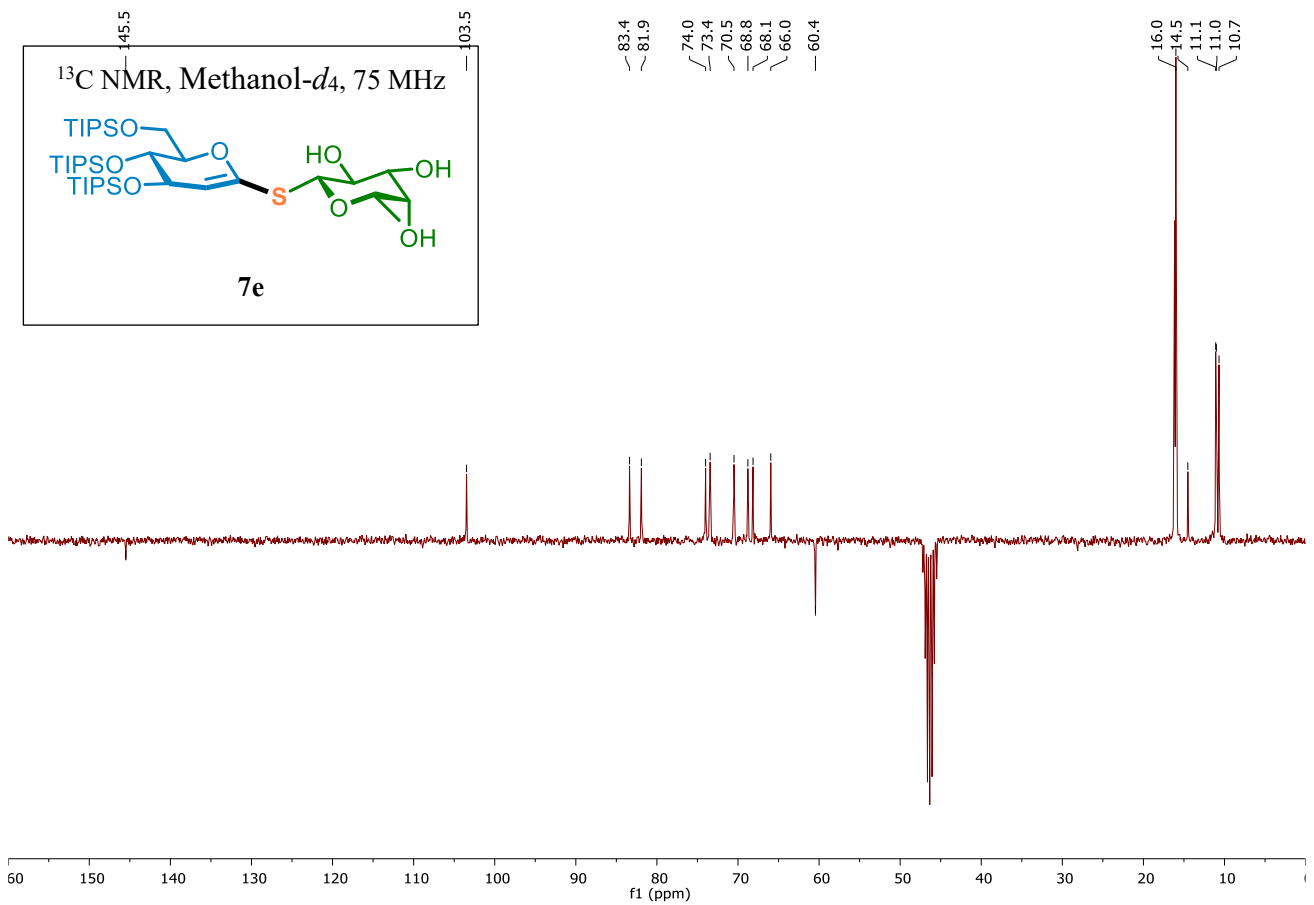

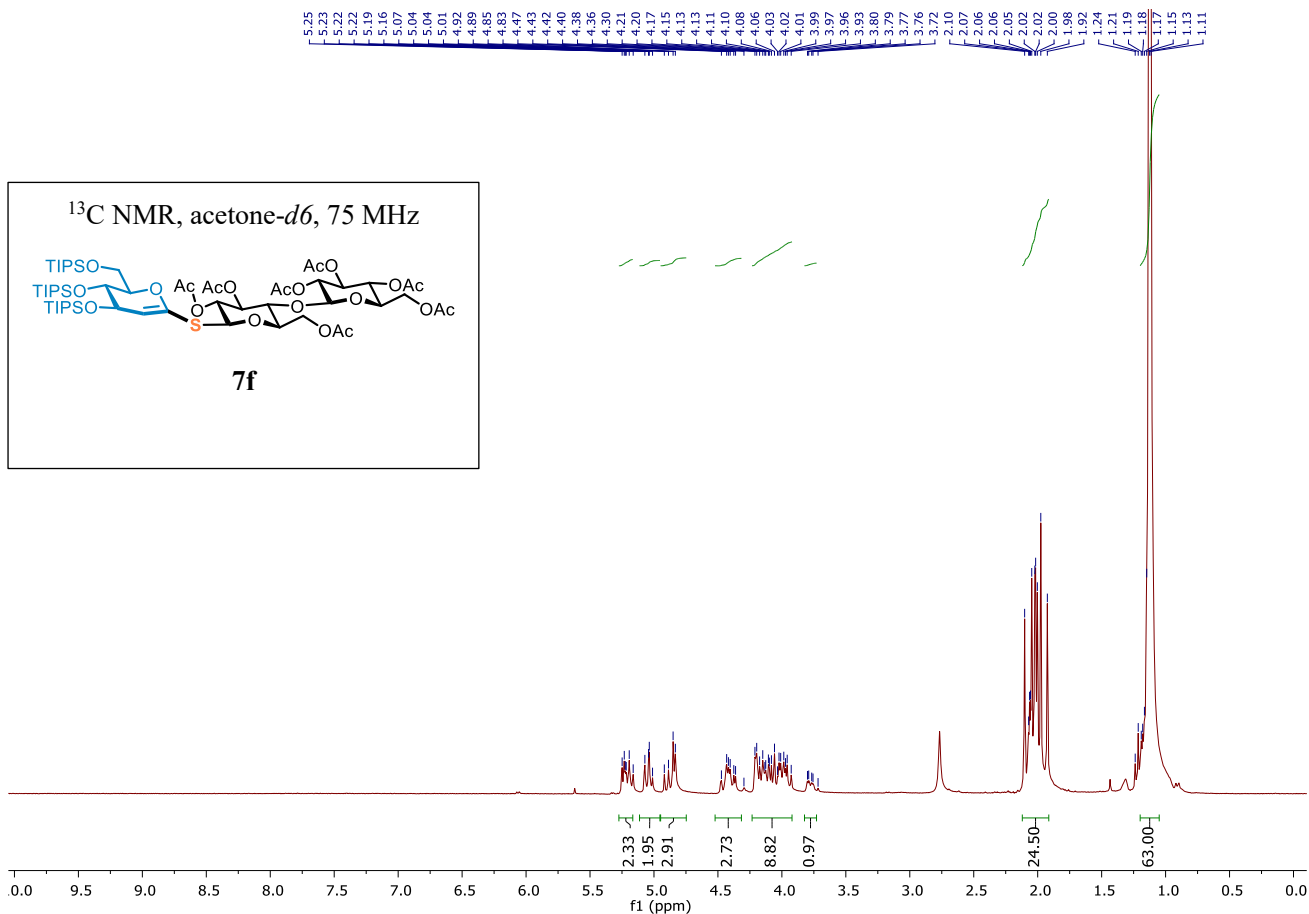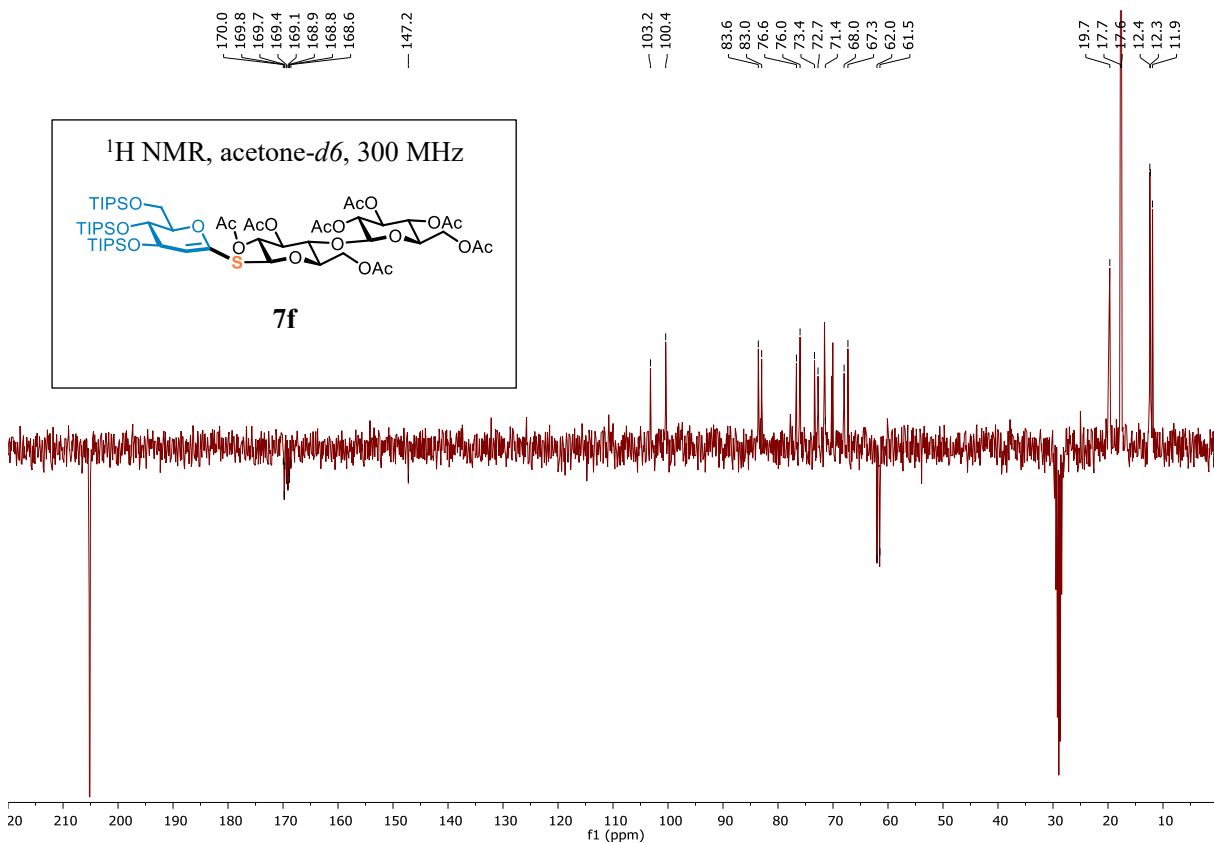

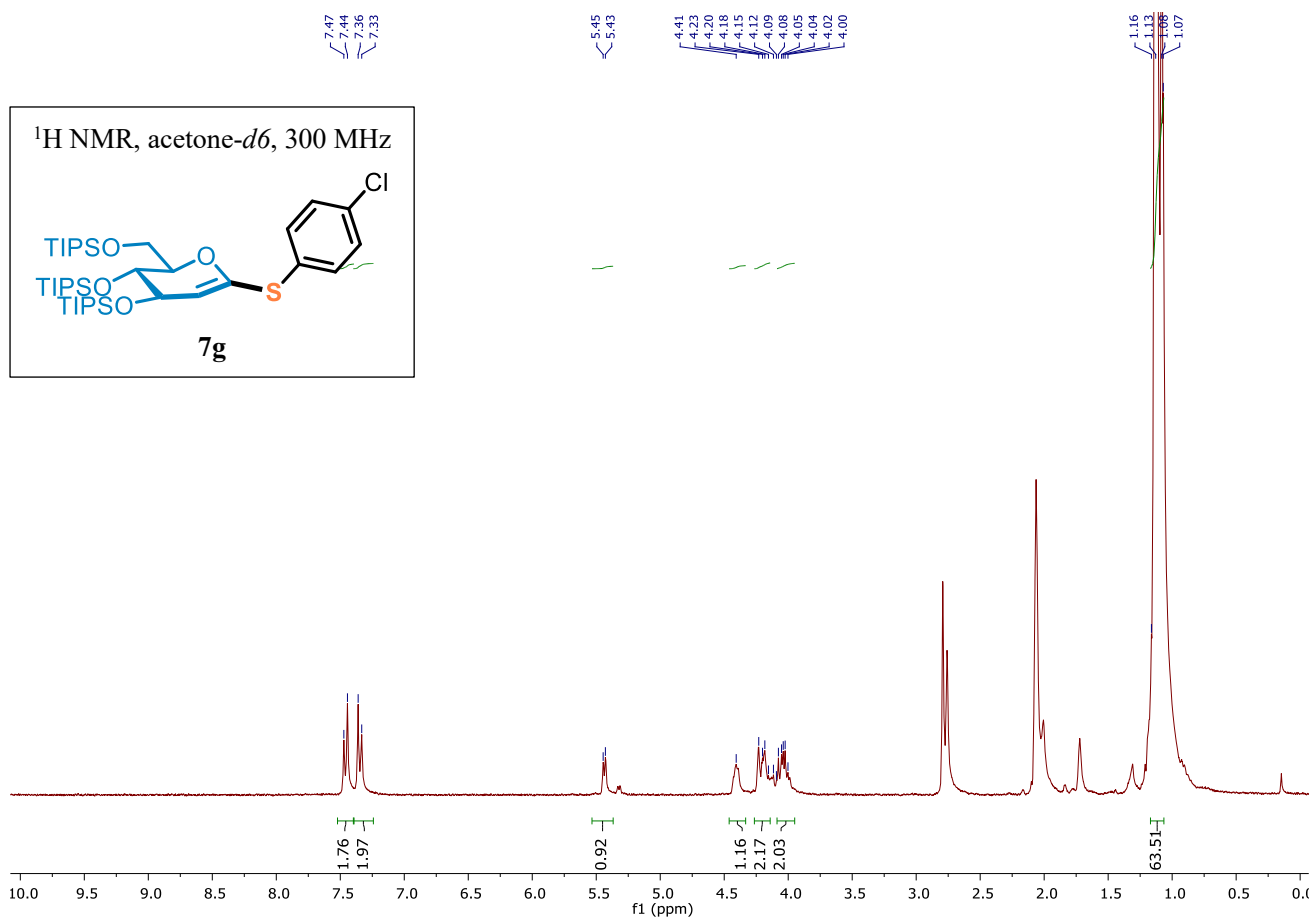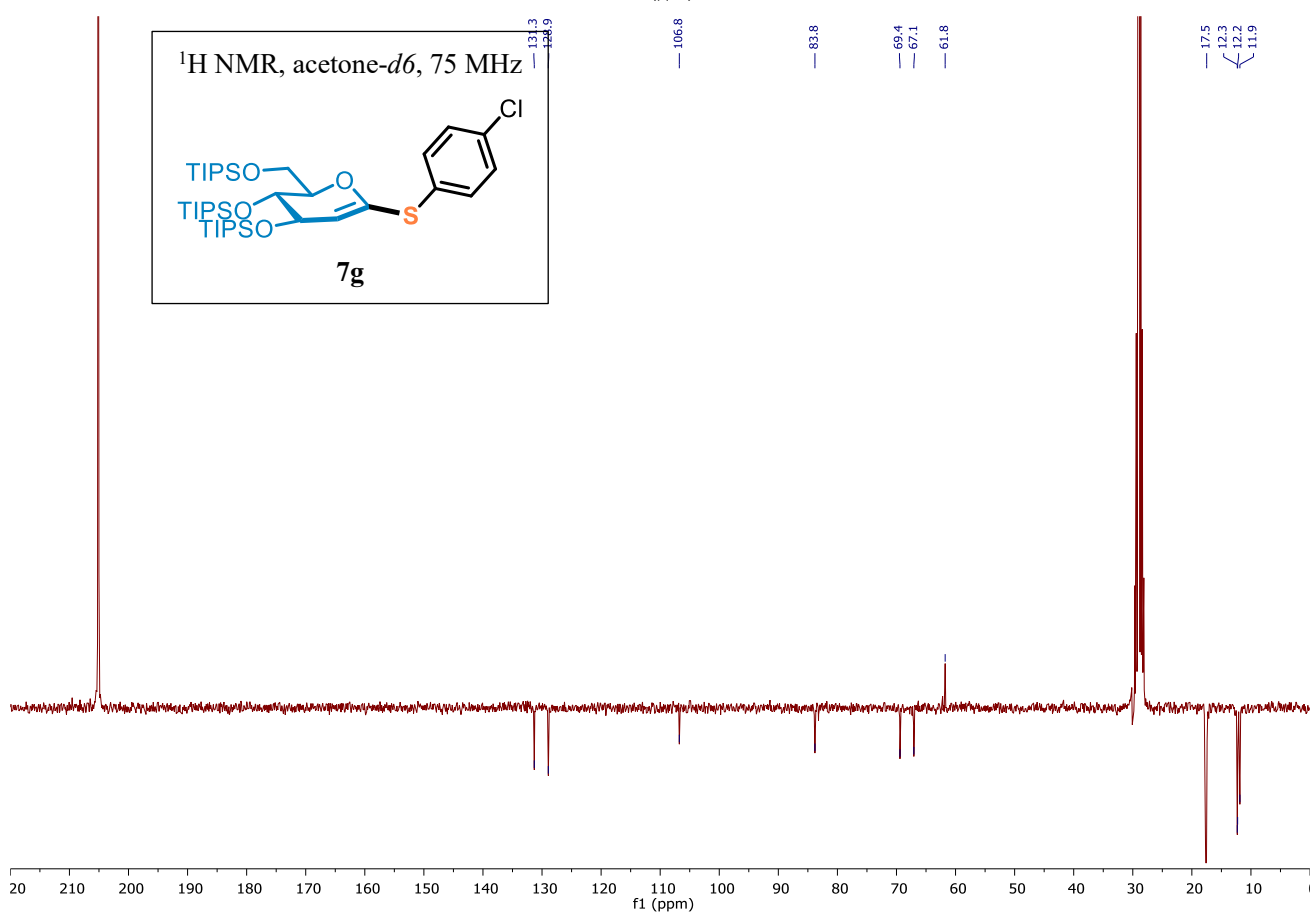

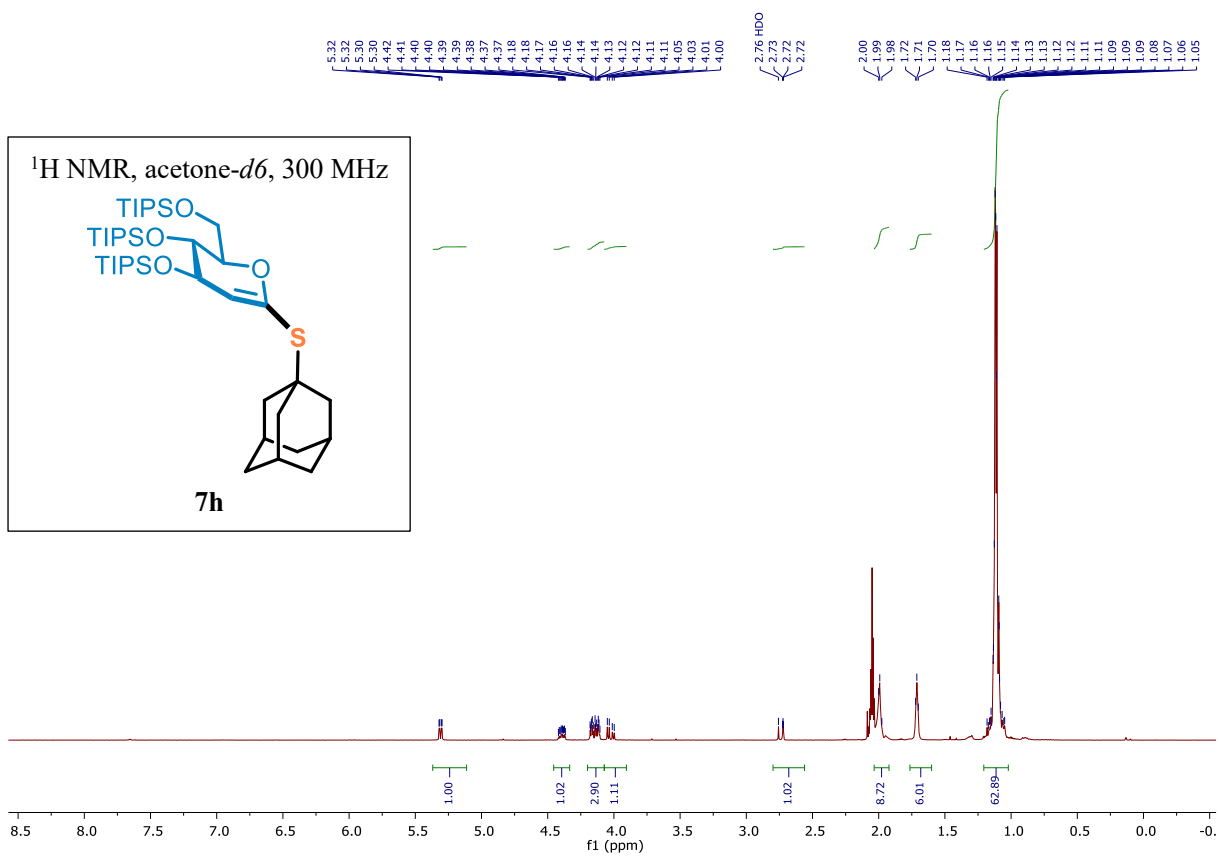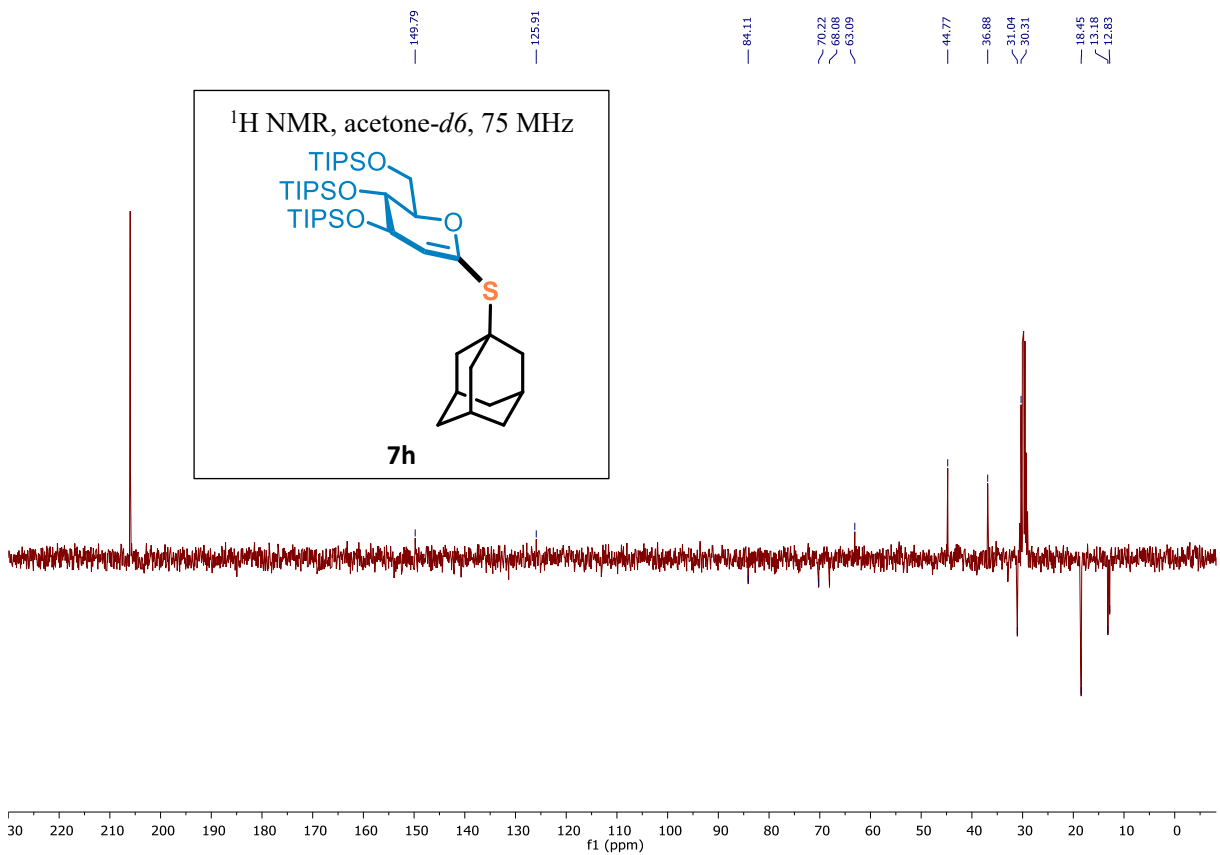

Supplement: d4qo01389a1.pdf [file d4qo01389a1.pdf]
